# Supplementary material for: Molecular cleft or tweezer compounds derived from trioxabicyclo[3.3.1]nonadiene diisocyanate and diacid dichloride
Source: publisher site journal article supplement (doi:10.3762/bjoc.11.1), 2015-01-02
Supplement: Additional file 1 [file 1860-5397-11-1-S1.pdf]

**Supporting Information**  
**for**  
**Molecular cleft or tweezer compounds derived from**  
**trioxabicyclo[3.3.1]nonadiene diisocyanate and diacid**  
**dichloride**

Gert Kollenz\*<sup>1</sup>, Ralf Smounig<sup>1</sup>, Ferdinand Belaj<sup>1</sup>, David Kvaskoff<sup>2</sup>, and Curt Wentrup\*<sup>2</sup>

Address: <sup>1</sup>Institute of Chemistry, Karl-Franzens University of Graz, Heinrichstrasse 28, A-8010 Graz, Austria and <sup>2</sup>School of Chemistry and Molecular Biosciences, The University of Queensland, Brisbane, Qld 4072, Australia

Email: Gert Kollenz\* - [gert.kollenz@uni-graz.at](mailto:gert.kollenz@uni-graz.at); Curt Wentrup\* - [wentrup@uq.edu.au](mailto:wentrup@uq.edu.au)

\*Corresponding author

Hydrogen bonding pattern in **5**, calculated structures of compounds **3**, **4**, **5**, **7a** and **7b**. X-ray structural data, bond lengths and bond angles for **4** and **5**, and preparative and computational details.

**Table of contents:**

|                                                                  |    |
|------------------------------------------------------------------|----|
| Figure S1. Plot of the hydrogen bonding scheme of <b>5</b> ..... | S2 |
| Figure S2. Calculated structures of <b>4</b> .....               | S3 |
| Figure S3. Calculated structure of <b>5</b> .....                | S4 |

|                                                                                                                  |     |
|------------------------------------------------------------------------------------------------------------------|-----|
| Figure S4. Calculated structure of <b>3</b> .....                                                                | S5  |
| Figure S5. Calculated structures of <b>7a</b> .....                                                              | S6  |
| Figure S6. Calculated structure of <b>7b</b> .....                                                               | S7  |
| Preparations .....                                                                                               | S8  |
| X-ray crystal data, structures, bond lengths, bond angles, and<br>hydrogen bonds for <b>4</b> and <b>5</b> ..... | S8  |
| Summary table of relative energies and harmonic frequencies,<br>calculated at the B3LYP/6-31G** level. ....      | S26 |
| Cartesian coordinates and energies calculated at the B3LYP/6-31G** level. ....                                   | S26 |
| References .....                                                                                                 | S60 |

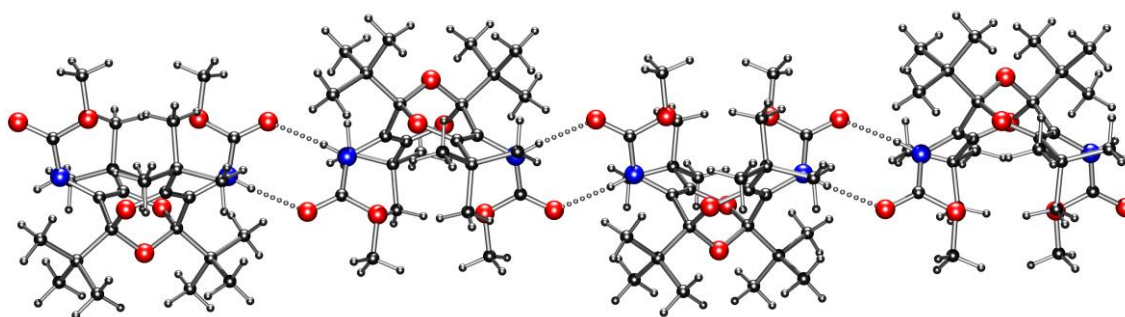

**Figure S1:** Plot of the hydrogen bonding scheme of **5**. The atoms are drawn with arbitrary radii, the hydrogen bonds are indicated by dotted lines.



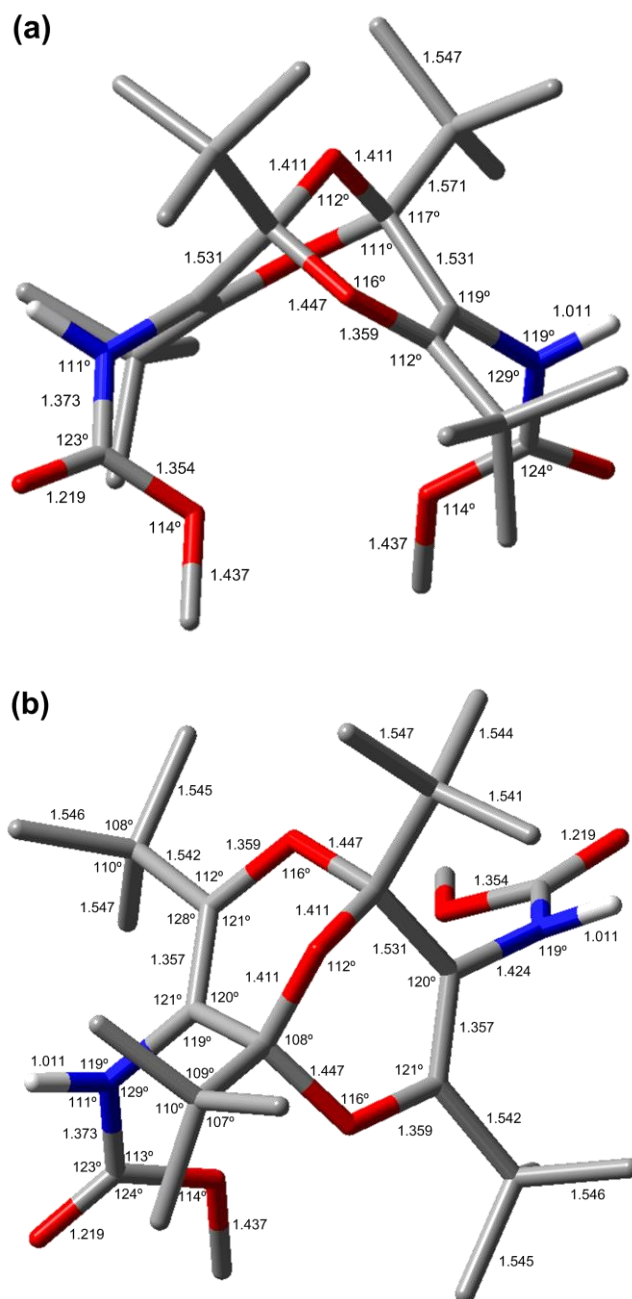

**Figure S3:** Two views of the calculated structure (B3LYP/6-31G\*\*) of dimethyl(1,3,5,7-tetra-*tert*-butyl-2,6,9-trioxabi-cyclo[3.3.1]nona-3,7-diene-4,8-diyl)biscarbamate (compound **5**, single isomer), including bond lengths [ $\text{\AA}$ ] and bond angles [ $^\circ$ ]. Methyl hydrogens omitted for clarity.

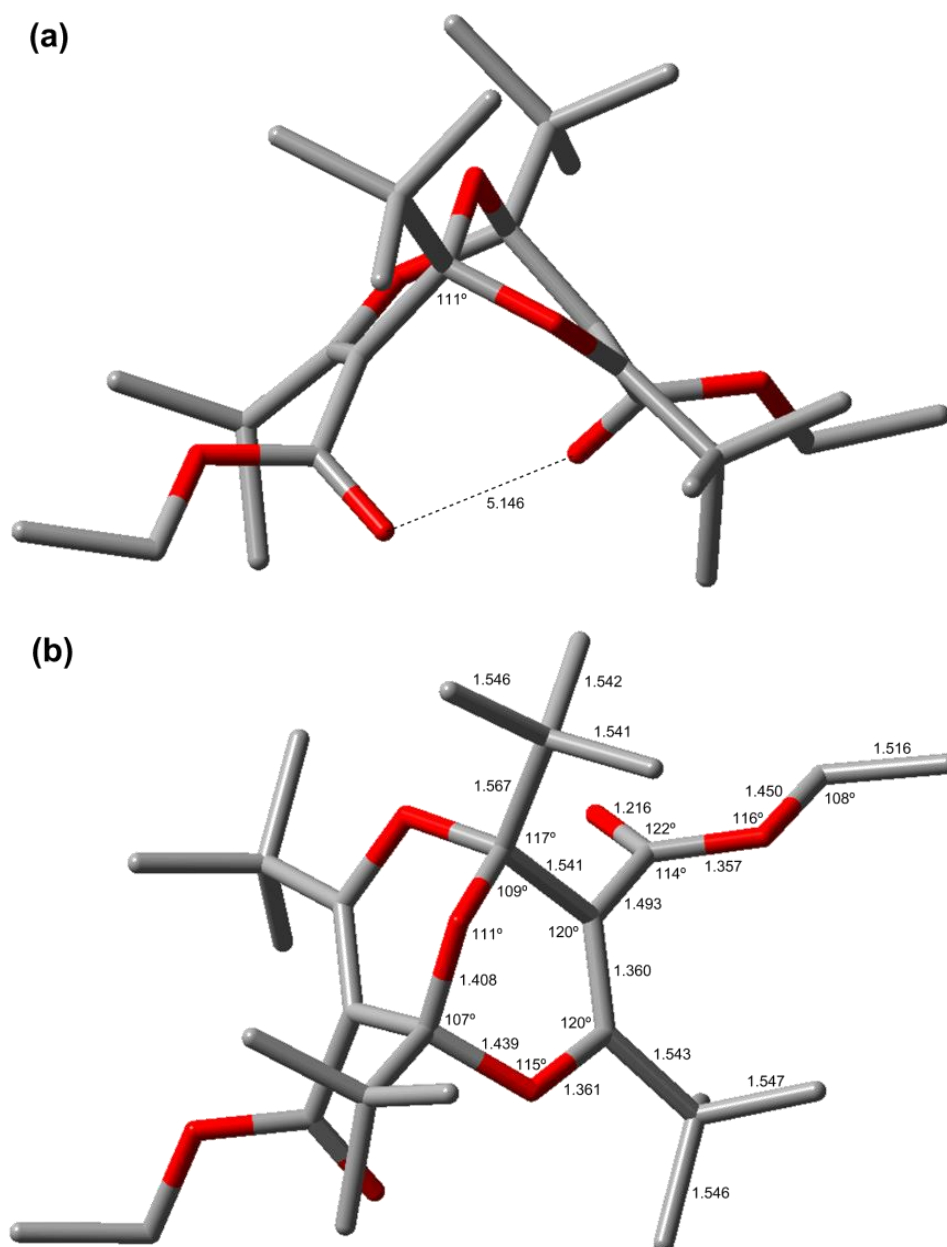

**Figure S4:** Two views of the calculated structure ( $C_2$  symmetry, B3LYP/6-31G\*\*) of diethyl ester **3**, including bond lengths [ $\text{\AA}$ ] and bond angles [ $^\circ$ ]. Methyl hydrogens omitted for clarity. The X-ray crystal structure of this compound is reported in reference [1].

(a)

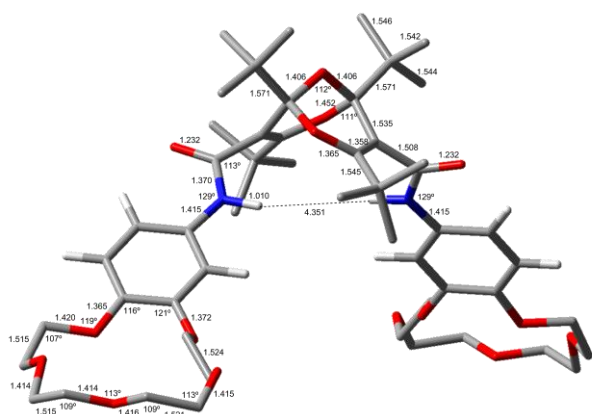

(b)

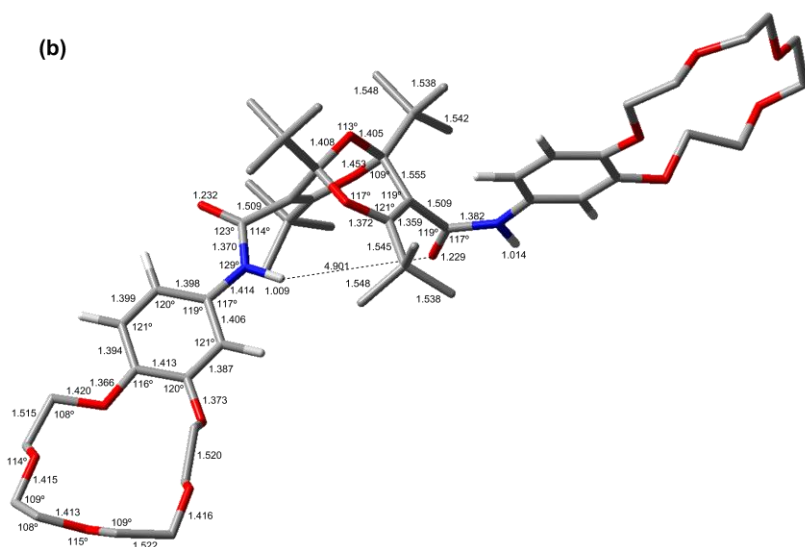

(c)

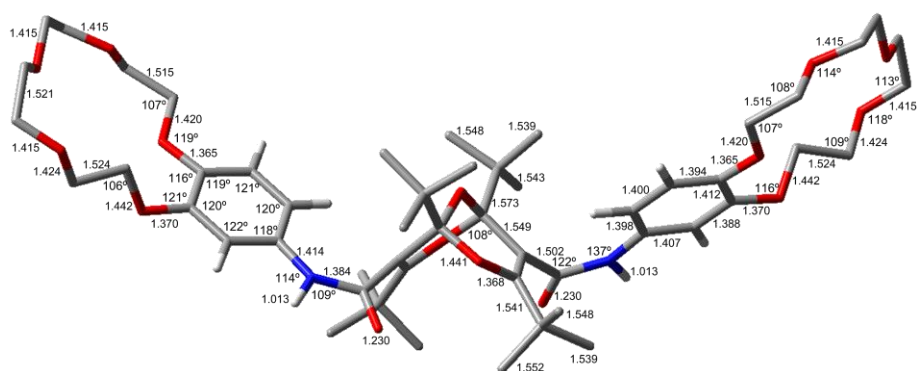

**Figure S5:** Calculated structures (B3LYP/6-31G\*\*) of **7a** (3 isomers **7a-a**, **7a-b**, and **7a-c**), including bond lengths [Å] and bond angles [°]. Methyl and methylene hydrogens omitted for clarity. **Relative energies** (see Table S7, p S26): **7a-a**: 0.0; **7a-b**: 12.2; **7a-c**: 21.0 kcal/mol.

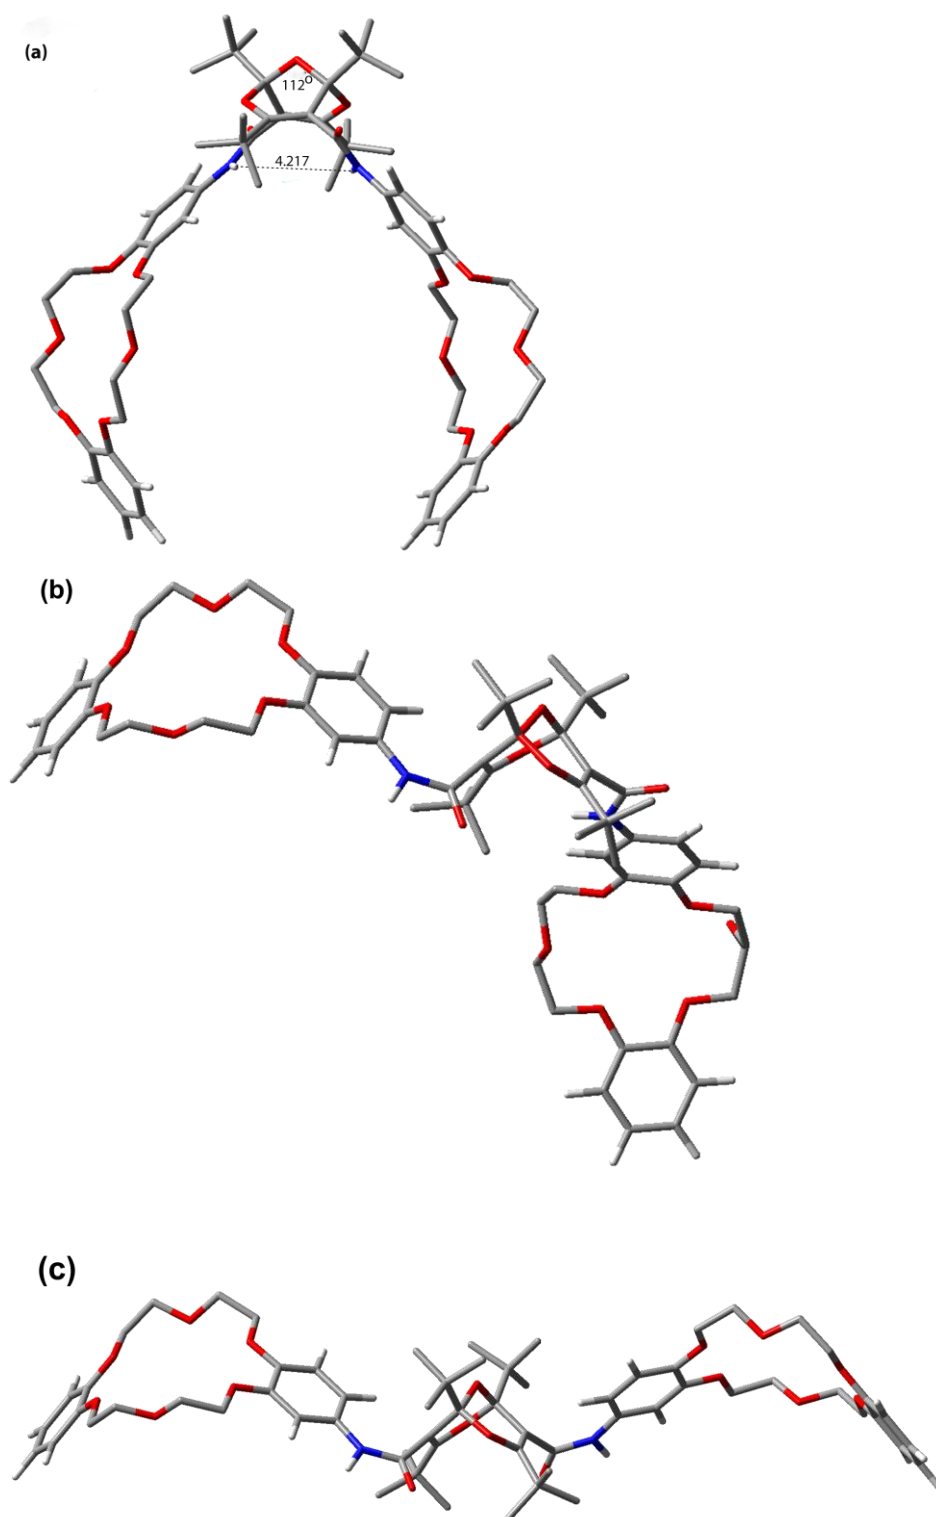

**Figure S6:** Calculated structures (B3LYP/6-31G\*\*) of **7b** (3 isomers, **7b-a**, **7b-b**, and **7b-c**), including bond lengths [ $\text{\AA}$ ] and bond angles [ $^\circ$ ]. Methyl and methylene hydrogens omitted for clarity. **Relative energies** (see Table S7, p S26): **7b-a** 0.0, **7b-b** 12.3, **7b-c** 16.8 kcal/mol.

## Preparations

Preparations of the di(hexylurea) **4**, the di(ethyl urethane) **5** and the diamides **7** were carried out as described in references [2-5].

### (1,3,5,7-Tetra-*tert*-butyl-2,6,9-trioxabicyclo[3.3.1]nona-3,7-diene)-4,8-dicarboxylic acid-(benzo-15-crown-5)-4'-yl-amide (**7a**)

Yield : 325 mg (80%); mp 100° C; IR (KBr): 3430 (NH), 304-2870 (CH), 1675 (C=O), 1610 (C=C) cm<sup>-1</sup>

<sup>1</sup>H-NMR(CDCl<sub>3</sub>): δ = 1.15, 1.4 (2s, 2x18H, *t*-Bu), 3.7-4.2 (m, 32H), 6.82 (b, 4H, Ar-H), 7.10 (s, 2H, Ar-H), 7.38 (s, 2NH) ppm;

<sup>13</sup>C-NMR (CDCl<sub>3</sub>): δ = 24.8, 29.4 (4C(CH<sub>3</sub>)<sub>3</sub>), 38.1, 40.3 (4C(CH<sub>3</sub>)<sub>3</sub>), 69.0, 69.5, 69.7, 69.8, 70.5, 70.7, 71.1, 71.2, (OCH<sub>2</sub>CH<sub>2</sub>), 98.2 (C-1/C-5), 106.7 (C-4/C-8), 111.8, 115.0, 132.0, 146.1, 149.6 (Ar-C), 161.8 (C-3/C-7), 165.8 (CO) ppm.

Anal.Calcd. for C<sub>52</sub>H<sub>76</sub>N<sub>2</sub>O<sub>15</sub> x H<sub>2</sub>O : C, 63.27; H, 7.90; N, 2.84; found : C, 63.50; H, 7.95; N, 2.95.

### (1,3,5,7-Tetra-*tert*-butyl-2,6,9-trioxabicyclo[3.3.1]nona-3,7-diene)-4,8-dicarboxylic acid-(dibenzo-18-crown-6)-4'-yl-amide (**7b**)

Yield: 410 mg (85%); mp 130°C; IR(KBr): 3420 (NH), 3000 – 2870 (CH), 1680 (C=O), 1610 (C=C) cm<sup>-1</sup>

<sup>1</sup>H-NMR (CDCl<sub>3</sub>): δ = 1.15, 1.4 (2s, 2x18H, *t*-Bu), 4.01 – 4.15 (m, 32H), 6.80-6.95 (m, 14H, Ar-H), 7.3 (s, 2NH) ppm.

Anal.Calcd. for C<sub>64</sub>H<sub>84</sub>N<sub>2</sub>O<sub>17</sub> x H<sub>2</sub>O : C, 65.62; H, 7.40; N, 2.39; found: C, 65.51; H, 7.15; N, 2.40.

**Table S1:** Crystal data and structure refinement for **4**.

#### Crystal data

|                                 |                                                               |
|---------------------------------|---------------------------------------------------------------|
| Identification code             | KRS91                                                         |
| Empirical formula               | C <sub>36</sub> H <sub>66</sub> N <sub>4</sub> O <sub>5</sub> |
| Formula weight                  | 634.93                                                        |
| Crystal description             | plate, colourless                                             |
| Crystal size                    | 0.32 x 0.27 x 0.09mm                                          |
| Crystal system, space group     | monoclinic, P 21/c                                            |
| Unit cell dimensions: a         | 21.0815(7)Å                                                   |
| b                               | 20.1551(6)Å                                                   |
| c                               | 17.9547(6)Å                                                   |
| β                               | 92.203(2)°                                                    |
| Volume                          | 7623.3(4)Å <sup>3</sup>                                       |
| Z                               | 8                                                             |
| Calculated density              | 1.106Mg/m <sup>3</sup>                                        |
| F(000)                          | 2800                                                          |
| Linear absorption coefficient μ | 0.073mm <sup>-1</sup>                                         |
| Absorption correction           | semi-empirical from equivalents                               |
| Max. and min. transmission      | 1.0000 and 0.7564                                             |
| Unit cell determination         | 2.49° < Θ < 26.19°<br>7734 reflections used at 100K           |

#### Data collection

|                             |                             |
|-----------------------------|-----------------------------|
| Temperature                 | 100K                        |
| Diffractometer              | Bruker APEX-II CCD          |
| Radiation source            | fine-focus sealed tube      |
| Radiation and wavelength    | MoK <sub>α</sub> , 0.71073Å |
| Monochromator               | graphite                    |
| Scan type                   | φ and ω scans               |
| Θ range for data collection | 2.18 to 25.00°              |



|                                |                                          |
|--------------------------------|------------------------------------------|
| Index ranges                   | -17 ≤ h ≤ 25, -23 ≤ k ≤ 23, -21 ≤ l ≤ 17 |
| Reflections collected / unique | 34296 / 13358                            |
| Significant unique reflections | 8670 with I > 2σ(I)                      |
| R(int), R(sigma)               | 0.0344, 0.0560                           |
| Completeness to Θ = 25.0°      | 99.5%                                    |

### Refinement

|                                   |                                                                                                                                                      |
|-----------------------------------|------------------------------------------------------------------------------------------------------------------------------------------------------|
| Refinement method                 | Full-matrix least-squares on F <sup>2</sup>                                                                                                          |
| Data / parameters / restraints    | 13358 / 902 / 37                                                                                                                                     |
| Goodness-of-fit on F <sup>2</sup> | 1.015                                                                                                                                                |
| Final R indices [I > 2σ(I)]       | R1 = 0.0670, wR2 = 0.1498                                                                                                                            |
| R indices (all data)              | R1 = 0.1112, wR2 = 0.1708                                                                                                                            |
| Extinction expression             | none                                                                                                                                                 |
| Weighting scheme                  | w = 1/[σ <sup>2</sup> (F <sub>o</sub> <sup>2</sup> )+(aP) <sup>2</sup> +bP] where P = (F <sub>o</sub> <sup>2</sup> +2F <sub>c</sub> <sup>2</sup> )/3 |
| Weighting scheme parameters a, b  | 0.0672, 6.5922                                                                                                                                       |
| Largest Δ/σ in last cycle         | 0.001                                                                                                                                                |
| Largest difference peak and hole  | 0.400 and -0.341e/Å <sup>3</sup>                                                                                                                     |
| Structure Solution Program        | SHELXS-97 (Sheldrick, 2008)                                                                                                                          |
| Structure Refinement Program      | SHELXL-97 (Sheldrick, 2008)                                                                                                                          |

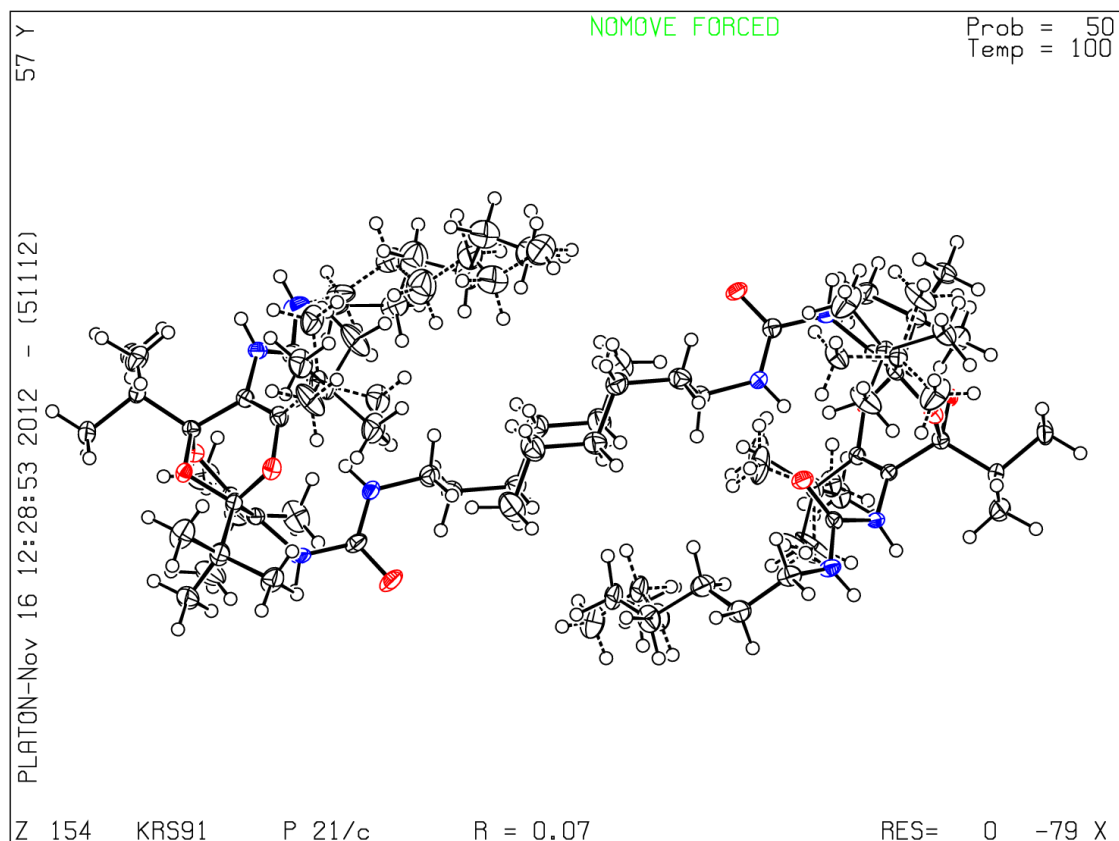

**Table S2:** Hydrogen bonds for **4 (KRS91)** [ $\text{\AA}$ ,  $^\circ$ ].

| D-H...A                            | d(D-H) | d(H...A)  | d(D...A) | $\angle(\text{DHA})$ |
|------------------------------------|--------|-----------|----------|----------------------|
| N(32)-H(32)...O(40)                | 0.88   | 1.970(14) | 2.763(3) | 149(2)               |
| N(41)-H(41)...O(30) <sup>i)</sup>  | 0.88   | 2.057(12) | 2.876(3) | 154(2)               |
| N(42)-H(42)...O(30) <sup>i)</sup>  | 0.88   | 2.131(13) | 2.935(3) | 151(2)               |
| N(82)-H(82)...O(90)                | 0.88   | 2.006(12) | 2.823(3) | 154(2)               |
| N(91)-H(91)...O(80) <sup>ii)</sup> | 0.88   | 2.043(13) | 2.852(3) | 152(2)               |
| N(92)-H(92)...O(80) <sup>ii)</sup> | 0.88   | 2.105(13) | 2.914(3) | 152(2)               |

Symmetry transformations used to generate equivalent atoms:

<sup>i)</sup>  $x, 3/2-y, z-1/2$     <sup>ii)</sup>  $x, 1/2-y, z+1/2$

**Table S3:** Full list of bond lengths [ $\text{\AA}$ ] and angles [ $^\circ$ ] for **4 (KRS91)**.

|               |           |               |           |
|---------------|-----------|---------------|-----------|
| C(1)-O(9)     | 1.414(3)  | C(117)-H(117) | 0.98      |
| C(1)-O(2)     | 1.434(3)  | C(117)-H(217) | 0.98      |
| C(1)-C(8)     | 1.520(3)  | C(117)-H(317) | 0.98      |
| C(1)-C(11)    | 1.555(3)  | C(118)-H(118) | 0.98      |
| O(2)-C(3)     | 1.373(3)  | C(118)-H(218) | 0.98      |
| C(3)-C(4)     | 1.338(4)  | C(118)-H(318) | 0.98      |
| C(3)-C(15)    | 1.533(4)  | C(19)-C(21)   | 1.534(4)  |
| C(3)-C(115)   | 1.537(10) | C(19)-C(20)   | 1.537(4)  |
| C(4)-N(31)    | 1.429(3)  | C(19)-C(22)   | 1.540(4)  |
| C(4)-C(5)     | 1.519(3)  | C(20)-H(201)  | 0.98      |
| C(5)-O(9)     | 1.406(3)  | C(20)-H(202)  | 0.98      |
| C(5)-O(6)     | 1.437(3)  | C(20)-H(203)  | 0.98      |
| C(5)-C(19)    | 1.561(3)  | C(21)-H(211)  | 0.98      |
| O(6)-C(7)     | 1.372(3)  | C(21)-H(212)  | 0.98      |
| C(7)-C(8)     | 1.347(3)  | C(21)-H(213)  | 0.98      |
| C(7)-C(123)   | 1.531(7)  | C(22)-H(221)  | 0.98      |
| C(7)-C(23)    | 1.531(5)  | C(22)-H(222)  | 0.98      |
| C(8)-N(41)    | 1.417(3)  | C(22)-H(223)  | 0.98      |
| C(11)-C(14)   | 1.534(4)  | C(23)-C(25)   | 1.574(13) |
| C(11)-C(13)   | 1.536(4)  | C(23)-C(26)   | 1.575(13) |
| C(11)-C(12)   | 1.540(4)  | C(23)-C(24)   | 1.575(13) |
| C(12)-H(121)  | 0.98      | C(24)-H(241)  | 0.98      |
| C(12)-H(122)  | 0.98      | C(24)-H(242)  | 0.98      |
| C(12)-H(123)  | 0.98      | C(24)-H(243)  | 0.98      |
| C(13)-H(131)  | 0.98      | C(25)-H(251)  | 0.98      |
| C(13)-H(132)  | 0.98      | C(25)-H(252)  | 0.98      |
| C(13)-H(133)  | 0.98      | C(25)-H(253)  | 0.98      |
| C(14)-H(141)  | 0.98      | C(26)-H(261)  | 0.98      |
| C(14)-H(142)  | 0.98      | C(26)-H(262)  | 0.98      |
| C(14)-H(143)  | 0.98      | C(26)-H(263)  | 0.98      |
| C(15)-C(17)   | 1.510(5)  | C(123)-C(125) | 1.41(3)   |
| C(15)-C(18)   | 1.532(5)  | C(123)-C(126) | 1.42(3)   |
| C(15)-C(16)   | 1.556(4)  | C(123)-C(124) | 1.47(3)   |
| C(16)-H(161)  | 0.98      | C(124)-H(124) | 0.98      |
| C(16)-H(162)  | 0.98      | C(124)-H(224) | 0.98      |
| C(16)-H(163)  | 0.98      | C(124)-H(324) | 0.98      |
| C(17)-H(171)  | 0.98      | C(125)-H(125) | 0.98      |
| C(17)-H(172)  | 0.98      | C(125)-H(225) | 0.98      |
| C(17)-H(173)  | 0.98      | C(125)-H(325) | 0.98      |
| C(18)-H(181)  | 0.98      | C(126)-H(126) | 0.98      |
| C(18)-H(182)  | 0.98      | C(126)-H(226) | 0.98      |
| C(18)-H(183)  | 0.98      | C(126)-H(326) | 0.98      |
| C(115)-C(117) | 1.542(12) | N(31)-C(30)   | 1.363(3)  |
| C(115)-C(118) | 1.543(12) | N(31)-H(31)   | 0.88      |
| C(115)-C(116) | 1.545(12) | C(30)-O(30)   | 1.248(3)  |
| C(116)-H(116) | 0.98      | C(30)-N(32)   | 1.333(3)  |
| C(116)-H(216) | 0.98      | N(32)-C(31)   | 1.456(3)  |
| C(116)-H(316) | 0.98      | N(32)-H(32)   | 0.88      |

|               |           |               |          |
|---------------|-----------|---------------|----------|
| C(31)-C(32)   | 1.525(4)  | C(146)-H(246) | 0.98     |
| C(31)-H(311)  | 0.99      | C(146)-H(346) | 0.98     |
| C(31)-H(312)  | 0.99      | C(51)-O(59)   | 1.410(3) |
| C(32)-C(33)   | 1.524(4)  | C(51)-O(52)   | 1.433(3) |
| C(32)-H(321)  | 0.99      | C(51)-C(58)   | 1.519(3) |
| C(32)-H(322)  | 0.99      | C(51)-C(61)   | 1.558(3) |
| C(33)-C(34)   | 1.513(4)  | O(52)-C(53)   | 1.364(3) |
| C(33)-H(331)  | 0.99      | C(53)-C(54)   | 1.336(4) |
| C(33)-H(332)  | 0.99      | C(53)-C(65)   | 1.529(4) |
| C(34)-C(35)   | 1.527(4)  | C(54)-N(81)   | 1.429(3) |
| C(34)-H(341)  | 0.99      | C(54)-C(55)   | 1.524(4) |
| C(34)-H(342)  | 0.99      | C(55)-O(59)   | 1.410(3) |
| C(35)-C(36)   | 1.505(4)  | C(55)-O(56)   | 1.442(3) |
| C(35)-H(351)  | 0.99      | C(55)-C(69)   | 1.561(4) |
| C(35)-H(352)  | 0.99      | O(56)-C(57)   | 1.367(3) |
| C(36)-H(361)  | 0.98      | C(57)-C(58)   | 1.344(3) |
| C(36)-H(362)  | 0.98      | C(57)-C(73)   | 1.536(5) |
| C(36)-H(363)  | 0.98      | C(57)-C(173)  | 1.537(8) |
| N(41)-C(40)   | 1.367(3)  | C(58)-N(91)   | 1.417(3) |
| N(41)-H(41)   | 0.88      | C(61)-C(64)   | 1.528(4) |
| C(40)-O(40)   | 1.240(3)  | C(61)-C(62)   | 1.531(4) |
| C(40)-N(42)   | 1.350(3)  | C(61)-C(63)   | 1.538(4) |
| N(42)-C(41)   | 1.449(3)  | C(62)-H(621)  | 0.98     |
| N(42)-H(42)   | 0.88      | C(62)-H(622)  | 0.98     |
| C(41)-C(42)   | 1.523(4)  | C(62)-H(623)  | 0.98     |
| C(41)-H(411)  | 0.99      | C(63)-H(631)  | 0.98     |
| C(41)-H(412)  | 0.99      | C(63)-H(632)  | 0.98     |
| C(42)-C(43)   | 1.516(4)  | C(63)-H(633)  | 0.98     |
| C(42)-H(421)  | 0.99      | C(64)-H(641)  | 0.98     |
| C(42)-H(422)  | 0.99      | C(64)-H(642)  | 0.98     |
| C(43)-C(144)  | 1.527(10) | C(64)-H(643)  | 0.98     |
| C(43)-C(44)   | 1.534(4)  | C(65)-C(67)   | 1.515(4) |
| C(43)-H(431)  | 0.99      | C(65)-C(66)   | 1.540(4) |
| C(43)-H(432)  | 0.99      | C(65)-C(68)   | 1.541(4) |
| C(44)-C(45)   | 1.544(5)  | C(66)-H(661)  | 0.98     |
| C(44)-H(441)  | 0.99      | C(66)-H(662)  | 0.98     |
| C(44)-H(442)  | 0.99      | C(66)-H(663)  | 0.98     |
| C(45)-C(46)   | 1.503(5)  | C(67)-H(671)  | 0.98     |
| C(45)-H(451)  | 0.99      | C(67)-H(672)  | 0.98     |
| C(45)-H(452)  | 0.99      | C(67)-H(673)  | 0.98     |
| C(46)-H(461)  | 0.98      | C(68)-H(681)  | 0.98     |
| C(46)-H(462)  | 0.98      | C(68)-H(682)  | 0.98     |
| C(46)-H(463)  | 0.98      | C(68)-H(683)  | 0.98     |
| C(144)-C(145) | 1.541(11) | C(69)-C(72)   | 1.530(4) |
| C(144)-H(144) | 0.99      | C(69)-C(70)   | 1.539(4) |
| C(144)-H(244) | 0.99      | C(69)-C(71)   | 1.541(4) |
| C(145)-C(146) | 1.506(10) | C(70)-H(701)  | 0.98     |
| C(145)-H(145) | 0.99      | C(70)-H(702)  | 0.98     |
| C(145)-H(245) | 0.99      | C(70)-H(703)  | 0.98     |
| C(146)-H(146) | 0.98      | C(71)-H(711)  | 0.98     |

|               |          |                |            |
|---------------|----------|----------------|------------|
| C(71)-H(712)  | 0.98     | C(86)-H(861)   | 0.98       |
| C(71)-H(713)  | 0.98     | C(86)-H(862)   | 0.98       |
| C(72)-H(721)  | 0.98     | C(86)-H(863)   | 0.98       |
| C(72)-H(722)  | 0.98     | N(91)-C(90)    | 1.364(3)   |
| C(72)-H(723)  | 0.98     | N(91)-H(91)    | 0.88       |
| C(73)-C(76)   | 1.524(6) | C(90)-O(90)    | 1.242(3)   |
| C(73)-C(74)   | 1.531(5) | C(90)-N(92)    | 1.348(3)   |
| C(73)-C(75)   | 1.535(5) | N(92)-C(191)   | 1.458(6)   |
| C(74)-H(741)  | 0.98     | N(92)-C(91)    | 1.463(6)   |
| C(74)-H(742)  | 0.98     | N(92)-H(92)    | 0.88       |
| C(74)-H(743)  | 0.98     | C(91)-C(92)    | 1.525(11)  |
| C(75)-H(751)  | 0.98     | C(91)-H(911)   | 0.99       |
| C(75)-H(752)  | 0.98     | C(91)-H(912)   | 0.99       |
| C(75)-H(753)  | 0.98     | C(92)-C(93)    | 1.486(8)   |
| C(76)-H(761)  | 0.98     | C(92)-H(921)   | 0.99       |
| C(76)-H(762)  | 0.98     | C(92)-H(922)   | 0.99       |
| C(76)-H(763)  | 0.98     | C(93)-C(94)    | 1.539(9)   |
| C(173)-C(175) | 1.513(8) | C(93)-H(931)   | 0.99       |
| C(173)-C(174) | 1.517(8) | C(93)-H(932)   | 0.99       |
| C(173)-C(176) | 1.518(8) | C(94)-C(95)    | 1.479(8)   |
| C(174)-H(174) | 0.98     | C(94)-H(941)   | 0.99       |
| C(174)-H(274) | 0.98     | C(94)-H(942)   | 0.99       |
| C(174)-H(374) | 0.98     | C(95)-C(96)    | 1.48(2)    |
| C(175)-H(175) | 0.98     | C(95)-H(951)   | 0.99       |
| C(175)-H(275) | 0.98     | C(95)-H(952)   | 0.99       |
| C(175)-H(375) | 0.98     | C(96)-H(961)   | 0.98       |
| C(176)-H(176) | 0.98     | C(96)-H(962)   | 0.98       |
| C(176)-H(276) | 0.98     | C(96)-H(963)   | 0.98       |
| C(176)-H(376) | 0.98     | C(191)-C(192)  | 1.523(10)  |
| N(81)-C(80)   | 1.371(3) | C(191)-H(191)  | 0.99       |
| N(81)-H(81)   | 0.88     | C(191)-H(291)  | 0.99       |
| C(80)-O(80)   | 1.248(3) | C(192)-C(193)  | 1.485(8)   |
| C(80)-N(82)   | 1.335(3) | C(192)-H(192)  | 0.99       |
| N(82)-C(81)   | 1.455(3) | C(192)-H(292)  | 0.99       |
| N(82)-H(82)   | 0.88     | C(193)-C(194)  | 1.534(9)   |
| C(81)-C(82)   | 1.521(4) | C(193)-H(193)  | 0.99       |
| C(81)-H(811)  | 0.99     | C(193)-H(293)  | 0.99       |
| C(81)-H(812)  | 0.99     | C(194)-C(195)  | 1.491(10)  |
| C(82)-C(83)   | 1.526(4) | C(194)-H(194)  | 0.99       |
| C(82)-H(821)  | 0.99     | C(194)-H(294)  | 0.99       |
| C(82)-H(822)  | 0.99     | C(195)-C(196)  | 1.48(2)    |
| C(83)-C(84)   | 1.519(4) | C(195)-H(195)  | 0.99       |
| C(83)-H(831)  | 0.99     | C(195)-H(295)  | 0.99       |
| C(83)-H(832)  | 0.99     | C(196)-H(196)  | 0.98       |
| C(84)-C(85)   | 1.526(4) | C(196)-H(296)  | 0.98       |
| C(84)-H(841)  | 0.99     | C(196)-H(396)  | 0.98       |
| C(84)-H(842)  | 0.99     |                |            |
| C(85)-C(86)   | 1.511(4) | O(9)-C(1)-O(2) | 107.67(18) |
| C(85)-H(851)  | 0.99     | O(9)-C(1)-C(8) | 108.51(19) |
| C(85)-H(852)  | 0.99     | O(2)-C(1)-C(8) | 111.41(19) |

|                     |            |                      |           |
|---------------------|------------|----------------------|-----------|
| O(9)-C(1)-C(11)     | 105.90(19) | H(141)-C(14)-H(143)  | 109.5     |
| O(2)-C(1)-C(11)     | 106.57(19) | H(142)-C(14)-H(143)  | 109.5     |
| C(8)-C(1)-C(11)     | 116.3(2)   | C(17)-C(15)-C(18)    | 109.5(3)  |
| C(3)-O(2)-C(1)      | 114.33(18) | C(17)-C(15)-C(3)     | 116.7(3)  |
| C(4)-C(3)-O(2)      | 119.4(2)   | C(18)-C(15)-C(3)     | 109.3(3)  |
| C(4)-C(3)-C(15)     | 130.4(2)   | C(17)-C(15)-C(16)    | 108.1(3)  |
| O(2)-C(3)-C(15)     | 110.1(2)   | C(18)-C(15)-C(16)    | 107.9(3)  |
| C(4)-C(3)-C(115)    | 141.9(6)   | C(3)-C(15)-C(16)     | 105.0(2)  |
| O(2)-C(3)-C(115)    | 98.1(6)    | C(15)-C(16)-H(161)   | 109.5     |
| C(3)-C(4)-N(31)     | 121.9(2)   | C(15)-C(16)-H(162)   | 109.5     |
| C(3)-C(4)-C(5)      | 121.5(2)   | H(161)-C(16)-H(162)  | 109.5     |
| N(31)-C(4)-C(5)     | 116.5(2)   | C(15)-C(16)-H(163)   | 109.5     |
| O(9)-C(5)-O(6)      | 107.49(18) | H(161)-C(16)-H(163)  | 109.5     |
| O(9)-C(5)-C(4)      | 108.48(19) | H(162)-C(16)-H(163)  | 109.5     |
| O(6)-C(5)-C(4)      | 112.11(19) | C(15)-C(17)-H(171)   | 109.5     |
| O(9)-C(5)-C(19)     | 105.98(19) | C(15)-C(17)-H(172)   | 109.5     |
| O(6)-C(5)-C(19)     | 106.48(19) | H(171)-C(17)-H(172)  | 109.5     |
| C(4)-C(5)-C(19)     | 115.8(2)   | C(15)-C(17)-H(173)   | 109.5     |
| C(7)-O(6)-C(5)      | 113.78(18) | H(171)-C(17)-H(173)  | 109.5     |
| C(8)-C(7)-O(6)      | 119.9(2)   | H(172)-C(17)-H(173)  | 109.5     |
| C(8)-C(7)-C(123)    | 131.5(5)   | C(15)-C(18)-H(181)   | 109.5     |
| O(6)-C(7)-C(123)    | 108.4(5)   | C(15)-C(18)-H(182)   | 109.5     |
| C(8)-C(7)-C(23)     | 130.1(3)   | H(181)-C(18)-H(182)  | 109.5     |
| O(6)-C(7)-C(23)     | 109.9(3)   | C(15)-C(18)-H(183)   | 109.5     |
| C(7)-C(8)-N(41)     | 122.4(2)   | H(181)-C(18)-H(183)  | 109.5     |
| C(7)-C(8)-C(1)      | 121.0(2)   | H(182)-C(18)-H(183)  | 109.5     |
| N(41)-C(8)-C(1)     | 116.5(2)   | C(3)-C(115)-C(117)   | 117.4(11) |
| C(5)-O(9)-C(1)      | 110.19(18) | C(3)-C(115)-C(118)   | 105.5(10) |
| C(14)-C(11)-C(13)   | 108.8(2)   | C(117)-C(115)-C(118) | 108.3(14) |
| C(14)-C(11)-C(12)   | 107.3(2)   | C(3)-C(115)-C(116)   | 105.7(10) |
| C(13)-C(11)-C(12)   | 110.2(2)   | C(117)-C(115)-C(116) | 111.5(13) |
| C(14)-C(11)-C(1)    | 108.7(2)   | C(118)-C(115)-C(116) | 108.0(13) |
| C(13)-C(11)-C(1)    | 109.3(2)   | C(115)-C(116)-H(116) | 109.5     |
| C(12)-C(11)-C(1)    | 112.4(2)   | C(115)-C(116)-H(216) | 109.5     |
| C(11)-C(12)-H(121)  | 109.5      | H(116)-C(116)-H(216) | 109.5     |
| C(11)-C(12)-H(122)  | 109.5      | C(115)-C(116)-H(316) | 109.5     |
| H(121)-C(12)-H(122) | 109.5      | H(116)-C(116)-H(316) | 109.5     |
| C(11)-C(12)-H(123)  | 109.5      | H(216)-C(116)-H(316) | 109.5     |
| H(121)-C(12)-H(123) | 109.5      | C(115)-C(117)-H(117) | 109.5     |
| H(122)-C(12)-H(123) | 109.5      | C(115)-C(117)-H(217) | 109.5     |
| C(11)-C(13)-H(131)  | 109.5      | H(117)-C(117)-H(217) | 109.5     |
| C(11)-C(13)-H(132)  | 109.5      | C(115)-C(117)-H(317) | 109.5     |
| H(131)-C(13)-H(132) | 109.5      | H(117)-C(117)-H(317) | 109.5     |
| C(11)-C(13)-H(133)  | 109.5      | H(217)-C(117)-H(317) | 109.5     |
| H(131)-C(13)-H(133) | 109.5      | C(115)-C(118)-H(118) | 109.5     |
| H(132)-C(13)-H(133) | 109.5      | C(115)-C(118)-H(218) | 109.5     |
| C(11)-C(14)-H(141)  | 109.5      | H(118)-C(118)-H(218) | 109.5     |
| C(11)-C(14)-H(142)  | 109.5      | C(115)-C(118)-H(318) | 109.5     |
| H(141)-C(14)-H(142) | 109.5      | H(118)-C(118)-H(318) | 109.5     |
| C(11)-C(14)-H(143)  | 109.5      | H(218)-C(118)-H(318) | 109.5     |

|                      |           |                      |           |
|----------------------|-----------|----------------------|-----------|
| C(21)-C(19)-C(20)    | 111.0(2)  | C(126)-C(123)-C(124) | 110(2)    |
| C(21)-C(19)-C(22)    | 108.6(2)  | C(125)-C(123)-C(7)   | 108.0(17) |
| C(20)-C(19)-C(22)    | 107.4(2)  | C(126)-C(123)-C(7)   | 111(2)    |
| C(21)-C(19)-C(5)     | 108.9(2)  | C(124)-C(123)-C(7)   | 111.4(17) |
| C(20)-C(19)-C(5)     | 112.5(2)  | C(123)-C(124)-H(124) | 109.5     |
| C(22)-C(19)-C(5)     | 108.3(2)  | C(123)-C(124)-H(224) | 109.5     |
| C(19)-C(20)-H(201)   | 109.5     | H(124)-C(124)-H(224) | 109.5     |
| C(19)-C(20)-H(202)   | 109.5     | C(123)-C(124)-H(324) | 109.5     |
| H(201)-C(20)-H(202)  | 109.5     | H(124)-C(124)-H(324) | 109.5     |
| C(19)-C(20)-H(203)   | 109.5     | H(224)-C(124)-H(324) | 109.5     |
| H(201)-C(20)-H(203)  | 109.5     | C(123)-C(125)-H(125) | 109.5     |
| H(202)-C(20)-H(203)  | 109.5     | C(123)-C(125)-H(225) | 109.5     |
| C(19)-C(21)-H(211)   | 109.5     | H(125)-C(125)-H(225) | 109.5     |
| C(19)-C(21)-H(212)   | 109.5     | C(123)-C(125)-H(325) | 109.5     |
| H(211)-C(21)-H(212)  | 109.5     | H(125)-C(125)-H(325) | 109.5     |
| C(19)-C(21)-H(213)   | 109.5     | H(225)-C(125)-H(325) | 109.5     |
| H(211)-C(21)-H(213)  | 109.5     | C(123)-C(126)-H(126) | 109.5     |
| H(212)-C(21)-H(213)  | 109.5     | C(123)-C(126)-H(226) | 109.5     |
| C(19)-C(22)-H(221)   | 109.5     | H(126)-C(126)-H(226) | 109.5     |
| C(19)-C(22)-H(222)   | 109.5     | C(123)-C(126)-H(326) | 109.5     |
| H(221)-C(22)-H(222)  | 109.5     | H(126)-C(126)-H(326) | 109.5     |
| C(19)-C(22)-H(223)   | 109.5     | H(226)-C(126)-H(326) | 109.5     |
| H(221)-C(22)-H(223)  | 109.5     | C(30)-N(31)-C(4)     | 127.5(2)  |
| H(222)-C(22)-H(223)  | 109.5     | C(30)-N(31)-H(31)    | 111.5(17) |
| C(7)-C(23)-C(25)     | 106.2(8)  | C(4)-N(31)-H(31)     | 120.8(17) |
| C(7)-C(23)-C(26)     | 110.4(10) | O(30)-C(30)-N(32)    | 122.8(2)  |
| C(25)-C(23)-C(26)    | 108.0(9)  | O(30)-C(30)-N(31)    | 119.3(2)  |
| C(7)-C(23)-C(24)     | 115.3(8)  | N(32)-C(30)-N(31)    | 117.9(2)  |
| C(25)-C(23)-C(24)    | 108.2(8)  | C(30)-N(32)-C(31)    | 120.6(2)  |
| C(26)-C(23)-C(24)    | 108.5(11) | C(30)-N(32)-H(32)    | 123.0(17) |
| C(23)-C(24)-H(241)   | 109.5     | C(31)-N(32)-H(32)    | 116.3(18) |
| C(23)-C(24)-H(242)   | 109.5     | N(32)-C(31)-C(32)    | 112.9(2)  |
| H(241)-C(24)-H(242)  | 109.5     | N(32)-C(31)-H(311)   | 109.0     |
| C(23)-C(24)-H(243)   | 109.5     | C(32)-C(31)-H(311)   | 109.0     |
| H(241)-C(24)-H(243)  | 109.5     | N(32)-C(31)-H(312)   | 109.0     |
| H(242)-C(24)-H(243)  | 109.5     | C(32)-C(31)-H(312)   | 109.0     |
| C(23)-C(25)-H(251)   | 109.5     | H(311)-C(31)-H(312)  | 107.8     |
| C(23)-C(25)-H(252)   | 109.5     | C(33)-C(32)-C(31)    | 113.3(2)  |
| H(251)-C(25)-H(252)  | 109.5     | C(33)-C(32)-H(321)   | 108.9     |
| C(23)-C(25)-H(253)   | 109.5     | C(31)-C(32)-H(321)   | 108.9     |
| H(251)-C(25)-H(253)  | 109.5     | C(33)-C(32)-H(322)   | 108.9     |
| H(252)-C(25)-H(253)  | 109.5     | C(31)-C(32)-H(322)   | 108.9     |
| C(23)-C(26)-H(261)   | 109.5     | H(321)-C(32)-H(322)  | 107.7     |
| C(23)-C(26)-H(262)   | 109.5     | C(34)-C(33)-C(32)    | 114.6(2)  |
| H(261)-C(26)-H(262)  | 109.5     | C(34)-C(33)-H(331)   | 108.6     |
| C(23)-C(26)-H(263)   | 109.5     | C(32)-C(33)-H(331)   | 108.6     |
| H(261)-C(26)-H(263)  | 109.5     | C(34)-C(33)-H(332)   | 108.6     |
| H(262)-C(26)-H(263)  | 109.5     | C(32)-C(33)-H(332)   | 108.6     |
| C(125)-C(123)-C(126) | 112(2)    | H(331)-C(33)-H(332)  | 107.6     |
| C(125)-C(123)-C(124) | 104.4(17) | C(33)-C(34)-C(35)    | 113.8(2)  |

|                     |           |                      |            |
|---------------------|-----------|----------------------|------------|
| C(33)-C(34)-H(341)  | 108.8     | C(43)-C(44)-H(442)   | 108.9      |
| C(35)-C(34)-H(341)  | 108.8     | C(45)-C(44)-H(442)   | 108.9      |
| C(33)-C(34)-H(342)  | 108.8     | H(441)-C(44)-H(442)  | 107.7      |
| C(35)-C(34)-H(342)  | 108.8     | C(46)-C(45)-C(44)    | 115.0(3)   |
| H(341)-C(34)-H(342) | 107.7     | C(46)-C(45)-H(451)   | 108.5      |
| C(36)-C(35)-C(34)   | 113.2(3)  | C(44)-C(45)-H(451)   | 108.5      |
| C(36)-C(35)-H(351)  | 108.9     | C(46)-C(45)-H(452)   | 108.5      |
| C(34)-C(35)-H(351)  | 108.9     | C(44)-C(45)-H(452)   | 108.5      |
| C(36)-C(35)-H(352)  | 108.9     | H(451)-C(45)-H(452)  | 107.5      |
| C(34)-C(35)-H(352)  | 108.9     | C(45)-C(46)-H(461)   | 109.5      |
| H(351)-C(35)-H(352) | 107.8     | C(45)-C(46)-H(462)   | 109.5      |
| C(35)-C(36)-H(361)  | 109.5     | H(461)-C(46)-H(462)  | 109.5      |
| C(35)-C(36)-H(362)  | 109.5     | C(45)-C(46)-H(463)   | 109.5      |
| H(361)-C(36)-H(362) | 109.5     | H(461)-C(46)-H(463)  | 109.5      |
| C(35)-C(36)-H(363)  | 109.5     | H(462)-C(46)-H(463)  | 109.5      |
| H(361)-C(36)-H(363) | 109.5     | C(43)-C(144)-C(145)  | 115.3(11)  |
| H(362)-C(36)-H(363) | 109.5     | C(43)-C(144)-H(144)  | 108.5      |
| C(40)-N(41)-C(8)    | 122.5(2)  | C(145)-C(144)-H(144) | 108.5      |
| C(40)-N(41)-H(41)   | 118.5(18) | C(43)-C(144)-H(244)  | 108.5      |
| C(8)-N(41)-H(41)    | 118.9(18) | C(145)-C(144)-H(244) | 108.5      |
| O(40)-C(40)-N(42)   | 122.6(2)  | H(144)-C(144)-H(244) | 107.5      |
| O(40)-C(40)-N(41)   | 123.0(2)  | C(146)-C(145)-C(144) | 110.6(13)  |
| N(42)-C(40)-N(41)   | 114.4(2)  | C(146)-C(145)-H(145) | 109.5      |
| C(40)-N(42)-C(41)   | 122.8(2)  | C(144)-C(145)-H(145) | 109.5      |
| C(40)-N(42)-H(42)   | 118.1(18) | C(146)-C(145)-H(245) | 109.5      |
| C(41)-N(42)-H(42)   | 119.0(18) | C(144)-C(145)-H(245) | 109.5      |
| N(42)-C(41)-C(42)   | 114.4(2)  | H(145)-C(145)-H(245) | 108.1      |
| N(42)-C(41)-H(411)  | 108.7     | C(145)-C(146)-H(146) | 109.5      |
| C(42)-C(41)-H(411)  | 108.7     | C(145)-C(146)-H(246) | 109.5      |
| N(42)-C(41)-H(412)  | 108.7     | H(146)-C(146)-H(246) | 109.5      |
| C(42)-C(41)-H(412)  | 108.7     | C(145)-C(146)-H(346) | 109.5      |
| H(411)-C(41)-H(412) | 107.6     | H(146)-C(146)-H(346) | 109.5      |
| C(43)-C(42)-C(41)   | 114.3(2)  | H(246)-C(146)-H(346) | 109.5      |
| C(43)-C(42)-H(421)  | 108.7     | O(59)-C(51)-O(52)    | 108.06(18) |
| C(41)-C(42)-H(421)  | 108.7     | O(59)-C(51)-C(58)    | 108.70(19) |
| C(43)-C(42)-H(422)  | 108.7     | O(52)-C(51)-C(58)    | 111.02(19) |
| C(41)-C(42)-H(422)  | 108.7     | O(59)-C(51)-C(61)    | 106.21(19) |
| H(421)-C(42)-H(422) | 107.6     | O(52)-C(51)-C(61)    | 106.79(19) |
| C(42)-C(43)-C(144)  | 124.7(8)  | C(58)-C(51)-C(61)    | 115.7(2)   |
| C(42)-C(43)-C(44)   | 112.5(3)  | C(53)-O(52)-C(51)    | 113.81(18) |
| C(42)-C(43)-H(431)  | 109.1     | C(54)-C(53)-O(52)    | 119.8(2)   |
| C(144)-C(43)-H(431) | 86.9      | C(54)-C(53)-C(65)    | 129.1(2)   |
| C(44)-C(43)-H(431)  | 109.1     | O(52)-C(53)-C(65)    | 110.9(2)   |
| C(42)-C(43)-H(432)  | 109.1     | C(53)-C(54)-N(81)    | 121.0(2)   |
| C(144)-C(43)-H(432) | 115.6     | C(53)-C(54)-C(55)    | 121.8(2)   |
| C(44)-C(43)-H(432)  | 109.1     | N(81)-C(54)-C(55)    | 117.1(2)   |
| H(431)-C(43)-H(432) | 107.8     | O(59)-C(55)-O(56)    | 107.12(19) |
| C(43)-C(44)-C(45)   | 113.5(3)  | O(59)-C(55)-C(54)    | 107.9(2)   |
| C(43)-C(44)-H(441)  | 108.9     | O(56)-C(55)-C(54)    | 113.1(2)   |
| C(45)-C(44)-H(441)  | 108.9     | O(59)-C(55)-C(69)    | 106.2(2)   |



|                     |            |                     |          |
|---------------------|------------|---------------------|----------|
| O(56)-C(55)-C(69)   | 106.0(2)   | H(671)-C(67)-H(672) | 109.5    |
| C(54)-C(55)-C(69)   | 116.1(2)   | C(65)-C(67)-H(673)  | 109.5    |
| C(57)-O(56)-C(55)   | 113.37(18) | H(671)-C(67)-H(673) | 109.5    |
| C(58)-C(57)-O(56)   | 120.0(2)   | H(672)-C(67)-H(673) | 109.5    |
| C(58)-C(57)-C(73)   | 130.3(3)   | C(65)-C(68)-H(681)  | 109.5    |
| O(56)-C(57)-C(73)   | 109.8(3)   | C(65)-C(68)-H(682)  | 109.5    |
| C(58)-C(57)-C(173)  | 128.8(4)   | H(681)-C(68)-H(682) | 109.5    |
| O(56)-C(57)-C(173)  | 109.7(4)   | C(65)-C(68)-H(683)  | 109.5    |
| C(57)-C(58)-N(91)   | 122.4(2)   | H(681)-C(68)-H(683) | 109.5    |
| C(57)-C(58)-C(51)   | 121.0(2)   | H(682)-C(68)-H(683) | 109.5    |
| N(91)-C(58)-C(51)   | 116.6(2)   | C(72)-C(69)-C(70)   | 110.9(2) |
| C(55)-O(59)-C(51)   | 109.92(18) | C(72)-C(69)-C(71)   | 108.9(2) |
| C(64)-C(61)-C(62)   | 110.3(2)   | C(70)-C(69)-C(71)   | 107.1(2) |
| C(64)-C(61)-C(63)   | 109.3(2)   | C(72)-C(69)-C(55)   | 109.7(2) |
| C(62)-C(61)-C(63)   | 107.2(2)   | C(70)-C(69)-C(55)   | 112.0(2) |
| C(64)-C(61)-C(51)   | 109.3(2)   | C(71)-C(69)-C(55)   | 108.2(2) |
| C(62)-C(61)-C(51)   | 112.4(2)   | C(69)-C(70)-H(701)  | 109.5    |
| C(63)-C(61)-C(51)   | 108.2(2)   | C(69)-C(70)-H(702)  | 109.5    |
| C(61)-C(62)-H(621)  | 109.5      | H(701)-C(70)-H(702) | 109.5    |
| C(61)-C(62)-H(622)  | 109.5      | C(69)-C(70)-H(703)  | 109.5    |
| H(621)-C(62)-H(622) | 109.5      | H(701)-C(70)-H(703) | 109.5    |
| C(61)-C(62)-H(623)  | 109.5      | H(702)-C(70)-H(703) | 109.5    |
| H(621)-C(62)-H(623) | 109.5      | C(69)-C(71)-H(711)  | 109.5    |
| H(622)-C(62)-H(623) | 109.5      | C(69)-C(71)-H(712)  | 109.5    |
| C(61)-C(63)-H(631)  | 109.5      | H(711)-C(71)-H(712) | 109.5    |
| C(61)-C(63)-H(632)  | 109.5      | C(69)-C(71)-H(713)  | 109.5    |
| H(631)-C(63)-H(632) | 109.5      | H(711)-C(71)-H(713) | 109.5    |
| C(61)-C(63)-H(633)  | 109.5      | H(712)-C(71)-H(713) | 109.5    |
| H(631)-C(63)-H(633) | 109.5      | C(69)-C(72)-H(721)  | 109.5    |
| H(632)-C(63)-H(633) | 109.5      | C(69)-C(72)-H(722)  | 109.5    |
| C(61)-C(64)-H(641)  | 109.5      | H(721)-C(72)-H(722) | 109.5    |
| C(61)-C(64)-H(642)  | 109.5      | C(69)-C(72)-H(723)  | 109.5    |
| H(641)-C(64)-H(642) | 109.5      | H(721)-C(72)-H(723) | 109.5    |
| C(61)-C(64)-H(643)  | 109.5      | H(722)-C(72)-H(723) | 109.5    |
| H(641)-C(64)-H(643) | 109.5      | C(76)-C(73)-C(74)   | 109.6(4) |
| H(642)-C(64)-H(643) | 109.5      | C(76)-C(73)-C(75)   | 107.9(4) |
| C(67)-C(65)-C(53)   | 114.1(2)   | C(74)-C(73)-C(75)   | 107.6(4) |
| C(67)-C(65)-C(66)   | 107.5(3)   | C(76)-C(73)-C(57)   | 115.3(4) |
| C(53)-C(65)-C(66)   | 110.0(2)   | C(74)-C(73)-C(57)   | 103.8(3) |
| C(67)-C(65)-C(68)   | 109.8(2)   | C(75)-C(73)-C(57)   | 112.3(4) |
| C(53)-C(65)-C(68)   | 107.6(2)   | C(73)-C(74)-H(741)  | 109.5    |
| C(66)-C(65)-C(68)   | 107.6(2)   | C(73)-C(74)-H(742)  | 109.5    |
| C(65)-C(66)-H(661)  | 109.5      | H(741)-C(74)-H(742) | 109.5    |
| C(65)-C(66)-H(662)  | 109.5      | C(73)-C(74)-H(743)  | 109.5    |
| H(661)-C(66)-H(662) | 109.5      | H(741)-C(74)-H(743) | 109.5    |
| C(65)-C(66)-H(663)  | 109.5      | H(742)-C(74)-H(743) | 109.5    |
| H(661)-C(66)-H(663) | 109.5      | C(73)-C(75)-H(751)  | 109.5    |
| H(662)-C(66)-H(663) | 109.5      | C(73)-C(75)-H(752)  | 109.5    |
| C(65)-C(67)-H(671)  | 109.5      | H(751)-C(75)-H(752) | 109.5    |
| C(65)-C(67)-H(672)  | 109.5      | C(73)-C(75)-H(753)  | 109.5    |

|                      |           |                     |           |
|----------------------|-----------|---------------------|-----------|
| H(751)-C(75)-H(753)  | 109.5     | C(81)-C(82)-H(822)  | 108.9     |
| H(752)-C(75)-H(753)  | 109.5     | C(83)-C(82)-H(822)  | 108.9     |
| C(73)-C(76)-H(761)   | 109.5     | H(821)-C(82)-H(822) | 107.7     |
| C(73)-C(76)-H(762)   | 109.5     | C(84)-C(83)-C(82)   | 114.6(2)  |
| H(761)-C(76)-H(762)  | 109.5     | C(84)-C(83)-H(831)  | 108.6     |
| C(73)-C(76)-H(763)   | 109.5     | C(82)-C(83)-H(831)  | 108.6     |
| H(761)-C(76)-H(763)  | 109.5     | C(84)-C(83)-H(832)  | 108.6     |
| H(762)-C(76)-H(763)  | 109.5     | C(82)-C(83)-H(832)  | 108.6     |
| C(175)-C(173)-C(174) | 109.5(7)  | H(831)-C(83)-H(832) | 107.6     |
| C(175)-C(173)-C(176) | 108.3(8)  | C(83)-C(84)-C(85)   | 113.8(2)  |
| C(174)-C(173)-C(176) | 107.8(8)  | C(83)-C(84)-H(841)  | 108.8     |
| C(175)-C(173)-C(57)  | 114.9(6)  | C(85)-C(84)-H(841)  | 108.8     |
| C(174)-C(173)-C(57)  | 106.7(6)  | C(83)-C(84)-H(842)  | 108.8     |
| C(176)-C(173)-C(57)  | 109.4(6)  | C(85)-C(84)-H(842)  | 108.8     |
| C(173)-C(174)-H(174) | 109.5     | H(841)-C(84)-H(842) | 107.7     |
| C(173)-C(174)-H(274) | 109.5     | C(86)-C(85)-C(84)   | 113.2(3)  |
| H(174)-C(174)-H(274) | 109.5     | C(86)-C(85)-H(851)  | 108.9     |
| C(173)-C(174)-H(374) | 109.5     | C(84)-C(85)-H(851)  | 108.9     |
| H(174)-C(174)-H(374) | 109.5     | C(86)-C(85)-H(852)  | 108.9     |
| H(274)-C(174)-H(374) | 109.5     | C(84)-C(85)-H(852)  | 108.9     |
| C(173)-C(175)-H(175) | 109.5     | H(851)-C(85)-H(852) | 107.8     |
| C(173)-C(175)-H(275) | 109.5     | C(85)-C(86)-H(861)  | 109.5     |
| H(175)-C(175)-H(275) | 109.5     | C(85)-C(86)-H(862)  | 109.5     |
| C(173)-C(175)-H(375) | 109.5     | H(861)-C(86)-H(862) | 109.5     |
| H(175)-C(175)-H(375) | 109.5     | C(85)-C(86)-H(863)  | 109.5     |
| H(275)-C(175)-H(375) | 109.5     | H(861)-C(86)-H(863) | 109.5     |
| C(173)-C(176)-H(176) | 109.5     | H(862)-C(86)-H(863) | 109.5     |
| C(173)-C(176)-H(276) | 109.5     | C(90)-N(91)-C(58)   | 121.1(2)  |
| H(176)-C(176)-H(276) | 109.5     | C(90)-N(91)-H(91)   | 119.1(18) |
| C(173)-C(176)-H(376) | 109.5     | C(58)-N(91)-H(91)   | 119.6(18) |
| H(176)-C(176)-H(376) | 109.5     | O(90)-C(90)-N(92)   | 121.9(3)  |
| H(276)-C(176)-H(376) | 109.5     | O(90)-C(90)-N(91)   | 123.2(2)  |
| C(80)-N(81)-C(54)    | 125.6(2)  | N(92)-C(90)-N(91)   | 114.9(2)  |
| C(80)-N(81)-H(81)    | 110.6(17) | C(90)-N(92)-C(191)  | 125.0(11) |
| C(54)-N(81)-H(81)    | 120.7(17) | C(90)-N(92)-C(91)   | 118.5(10) |
| O(80)-C(80)-N(82)    | 122.4(2)  | C(90)-N(92)-H(92)   | 117.4(18) |
| O(80)-C(80)-N(81)    | 119.7(2)  | C(191)-N(92)-H(92)  | 113(2)    |
| N(82)-C(80)-N(81)    | 117.9(2)  | C(91)-N(92)-H(92)   | 123(2)    |
| C(80)-N(82)-C(81)    | 120.3(2)  | N(92)-C(91)-C(92)   | 110.2(7)  |
| C(80)-N(82)-H(82)    | 119.4(17) | N(92)-C(91)-H(911)  | 109.6     |
| C(81)-N(82)-H(82)    | 118.8(17) | C(92)-C(91)-H(911)  | 109.6     |
| N(82)-C(81)-C(82)    | 113.1(2)  | N(92)-C(91)-H(912)  | 109.6     |
| N(82)-C(81)-H(811)   | 109.0     | C(92)-C(91)-H(912)  | 109.6     |
| C(82)-C(81)-H(811)   | 109.0     | H(911)-C(91)-H(912) | 108.1     |
| N(82)-C(81)-H(812)   | 109.0     | C(93)-C(92)-C(91)   | 117.5(9)  |
| C(82)-C(81)-H(812)   | 109.0     | C(93)-C(92)-H(921)  | 107.9     |
| H(811)-C(81)-H(812)  | 107.8     | C(91)-C(92)-H(921)  | 107.9     |
| C(81)-C(82)-C(83)    | 113.4(2)  | C(93)-C(92)-H(922)  | 107.9     |
| C(81)-C(82)-H(821)   | 108.9     | C(91)-C(92)-H(922)  | 107.9     |
| C(83)-C(82)-H(821)   | 108.9     | H(921)-C(92)-H(922) | 107.2     |

|                      |           |                        |            |
|----------------------|-----------|------------------------|------------|
| C(92)-C(93)-C(94)    | 110.3(7)  | C(194)-C(195)-H(195)   | 108.9      |
| C(92)-C(93)-H(931)   | 109.6     | C(196)-C(195)-H(295)   | 108.9      |
| C(94)-C(93)-H(931)   | 109.6     | C(194)-C(195)-H(295)   | 108.9      |
| C(92)-C(93)-H(932)   | 109.6     | H(195)-C(195)-H(295)   | 107.7      |
| C(94)-C(93)-H(932)   | 109.6     | C(195)-C(196)-H(196)   | 109.5      |
| H(931)-C(93)-H(932)  | 108.1     | C(195)-C(196)-H(296)   | 109.5      |
| C(95)-C(94)-C(93)    | 114.2(7)  | H(196)-C(196)-H(296)   | 109.5      |
| C(95)-C(94)-H(941)   | 108.7     | C(195)-C(196)-H(396)   | 109.5      |
| C(93)-C(94)-H(941)   | 108.7     | H(196)-C(196)-H(396)   | 109.5      |
| C(95)-C(94)-H(942)   | 108.7     | H(296)-C(196)-H(396)   | 109.5      |
| C(93)-C(94)-H(942)   | 108.7     |                        |            |
| H(941)-C(94)-H(942)  | 107.6     | O(9)-C(1)-O(2)-C(3)    | 50.7(2)    |
| C(94)-C(95)-C(96)    | 117(2)    | C(8)-C(1)-O(2)-C(3)    | -68.2(2)   |
| C(94)-C(95)-H(951)   | 108.1     | C(11)-C(1)-O(2)-C(3)   | 163.92(19) |
| C(96)-C(95)-H(951)   | 108.1     | C(1)-O(2)-C(3)-C(4)    | -8.7(3)    |
| C(94)-C(95)-H(952)   | 108.1     | C(1)-O(2)-C(3)-C(15)   | 173.5(2)   |
| C(96)-C(95)-H(952)   | 108.1     | C(1)-O(2)-C(3)-C(115)  | 177.9(6)   |
| H(951)-C(95)-H(952)  | 107.3     | O(2)-C(3)-C(4)-N(31)   | 169.9(2)   |
| C(95)-C(96)-H(961)   | 109.5     | C(15)-C(3)-C(4)-N(31)  | -12.8(4)   |
| C(95)-C(96)-H(962)   | 109.5     | C(115)-C(3)-C(4)-N(31) | -20.8(11)  |
| H(961)-C(96)-H(962)  | 109.5     | O(2)-C(3)-C(4)-C(5)    | -14.6(3)   |
| C(95)-C(96)-H(963)   | 109.5     | C(15)-C(3)-C(4)-C(5)   | 162.8(3)   |
| H(961)-C(96)-H(963)  | 109.5     | C(115)-C(3)-C(4)-C(5)  | 154.8(10)  |
| H(962)-C(96)-H(963)  | 109.5     | C(3)-C(4)-C(5)-O(9)    | -5.6(3)    |
| N(92)-C(191)-C(192)  | 116.8(7)  | N(31)-C(4)-C(5)-O(9)   | 170.20(19) |
| N(92)-C(191)-H(191)  | 108.1     | C(3)-C(4)-C(5)-O(6)    | 112.9(2)   |
| C(192)-C(191)-H(191) | 108.1     | N(31)-C(4)-C(5)-O(6)   | -71.3(3)   |
| N(92)-C(191)-H(291)  | 108.1     | C(3)-C(4)-C(5)-C(19)   | -124.6(3)  |
| C(192)-C(191)-H(291) | 108.1     | N(31)-C(4)-C(5)-C(19)  | 51.2(3)    |
| H(191)-C(191)-H(291) | 107.3     | O(9)-C(5)-O(6)-C(7)    | 52.4(2)    |
| C(193)-C(192)-C(191) | 114.2(11) | C(4)-C(5)-O(6)-C(7)    | -66.8(2)   |
| C(193)-C(192)-H(192) | 108.7     | C(19)-C(5)-O(6)-C(7)   | 165.57(18) |
| C(191)-C(192)-H(192) | 108.7     | C(5)-O(6)-C(7)-C(8)    | -10.6(3)   |
| C(193)-C(192)-H(292) | 108.7     | C(5)-O(6)-C(7)-C(123)  | 173.7(5)   |
| C(191)-C(192)-H(292) | 108.7     | C(5)-O(6)-C(7)-C(23)   | 173.7(3)   |
| H(192)-C(192)-H(292) | 107.6     | O(6)-C(7)-C(8)-N(41)   | 166.3(2)   |
| C(192)-C(193)-C(194) | 117.2(8)  | C(123)-C(7)-C(8)-N(41) | -19.2(7)   |
| C(192)-C(193)-H(193) | 108.0     | C(23)-C(7)-C(8)-N(41)  | -19.1(5)   |
| C(194)-C(193)-H(193) | 108.0     | O(6)-C(7)-C(8)-C(1)    | -13.0(3)   |
| C(192)-C(193)-H(293) | 108.0     | C(123)-C(7)-C(8)-C(1)  | 161.5(6)   |
| C(194)-C(193)-H(293) | 108.0     | C(23)-C(7)-C(8)-C(1)   | 161.6(3)   |
| H(193)-C(193)-H(293) | 107.2     | O(9)-C(1)-C(8)-C(7)    | -5.9(3)    |
| C(195)-C(194)-C(193) | 113.2(9)  | O(2)-C(1)-C(8)-C(7)    | 112.4(2)   |
| C(195)-C(194)-H(194) | 108.9     | C(11)-C(1)-C(8)-C(7)   | -125.2(2)  |
| C(193)-C(194)-H(194) | 108.9     | O(9)-C(1)-C(8)-N(41)   | 174.73(18) |
| C(195)-C(194)-H(294) | 108.9     | O(2)-C(1)-C(8)-N(41)   | -66.9(3)   |
| C(193)-C(194)-H(294) | 108.9     | C(11)-C(1)-C(8)-N(41)  | 55.5(3)    |
| H(194)-C(194)-H(294) | 107.7     | O(6)-C(5)-O(9)-C(1)    | -73.3(2)   |
| C(196)-C(195)-C(194) | 113(2)    | C(4)-C(5)-O(9)-C(1)    | 48.1(2)    |
| C(196)-C(195)-H(195) | 108.9     | C(19)-C(5)-O(9)-C(1)   | 173.14(18) |

|                          |            |                            |             |
|--------------------------|------------|----------------------------|-------------|
| O(2)-C(1)-O(9)-C(5)      | -72.6(2)   | C(23)-C(7)-C(123)-C(125)   | -128(28)    |
| C(8)-C(1)-O(9)-C(5)      | 48.1(2)    | C(8)-C(7)-C(123)-C(126)    | 113.0(17)   |
| C(11)-C(1)-O(9)-C(5)     | 173.68(18) | O(6)-C(7)-C(123)-C(126)    | -72.0(18)   |
| O(9)-C(1)-C(11)-C(14)    | 43.5(3)    | C(23)-C(7)-C(123)-C(126)   | 109(28)     |
| O(2)-C(1)-C(11)-C(14)    | -70.9(3)   | C(8)-C(7)-C(123)-C(124)    | -9.3(16)    |
| C(8)-C(1)-C(11)-C(14)    | 164.2(2)   | O(6)-C(7)-C(123)-C(124)    | 165.7(13)   |
| O(9)-C(1)-C(11)-C(13)    | -75.1(2)   | C(23)-C(7)-C(123)-C(124)   | -14(27)     |
| O(2)-C(1)-C(11)-C(13)    | 170.5(2)   | C(3)-C(4)-N(31)-C(30)      | -80.8(3)    |
| C(8)-C(1)-C(11)-C(13)    | 45.5(3)    | C(5)-C(4)-N(31)-C(30)      | 103.4(3)    |
| O(9)-C(1)-C(11)-C(12)    | 162.2(2)   | C(4)-N(31)-C(30)-O(30)     | -172.1(2)   |
| O(2)-C(1)-C(11)-C(12)    | 47.7(3)    | C(4)-N(31)-C(30)-N(32)     | 8.5(4)      |
| C(8)-C(1)-C(11)-C(12)    | -77.2(3)   | O(30)-C(30)-N(32)-C(31)    | -3.1(4)     |
| C(4)-C(3)-C(15)-C(17)    | -0.4(5)    | N(31)-C(30)-N(32)-C(31)    | 176.4(2)    |
| O(2)-C(3)-C(15)-C(17)    | 177.2(3)   | C(30)-N(32)-C(31)-C(32)    | -81.4(3)    |
| C(115)-C(3)-C(15)-C(17)  | 157(3)     | N(32)-C(31)-C(32)-C(33)    | 168.5(2)    |
| C(4)-C(3)-C(15)-C(18)    | 124.5(3)   | C(31)-C(32)-C(33)-C(34)    | 68.0(3)     |
| O(2)-C(3)-C(15)-C(18)    | -58.0(3)   | C(32)-C(33)-C(34)-C(35)    | 174.2(2)    |
| C(115)-C(3)-C(15)-C(18)  | -78(3)     | C(33)-C(34)-C(35)-C(36)    | -179.1(3)   |
| C(4)-C(3)-C(15)-C(16)    | -120.0(3)  | C(7)-C(8)-N(41)-C(40)      | -76.1(3)    |
| O(2)-C(3)-C(15)-C(16)    | 57.5(3)    | C(1)-C(8)-N(41)-C(40)      | 103.2(3)    |
| C(115)-C(3)-C(15)-C(16)  | 37(3)      | C(8)-N(41)-C(40)-O(40)     | 4.6(4)      |
| C(4)-C(3)-C(115)-C(117)  | -175.2(10) | C(8)-N(41)-C(40)-N(42)     | -175.9(2)   |
| O(2)-C(3)-C(115)-C(117)  | -4.5(14)   | O(40)-C(40)-N(42)-C(41)    | -2.3(4)     |
| C(15)-C(3)-C(115)-C(117) | 156(4)     | N(41)-C(40)-N(42)-C(41)    | 178.2(2)    |
| C(4)-C(3)-C(115)-C(118)  | -54.4(17)  | C(40)-N(42)-C(41)-C(42)    | 103.1(3)    |
| O(2)-C(3)-C(115)-C(118)  | 116.2(11)  | N(42)-C(41)-C(42)-C(43)    | -64.3(3)    |
| C(15)-C(3)-C(115)-C(118) | -83(3)     | C(41)-C(42)-C(43)-C(144)   | 166.1(10)   |
| C(4)-C(3)-C(115)-C(116)  | 59.8(16)   | C(41)-C(42)-C(43)-C(44)    | -172.5(3)   |
| O(2)-C(3)-C(115)-C(116)  | -129.5(10) | C(42)-C(43)-C(44)-C(45)    | -175.3(3)   |
| C(15)-C(3)-C(115)-C(116) | 31(3)      | C(144)-C(43)-C(44)-C(45)   | -48(2)      |
| O(9)-C(5)-C(19)-C(21)    | -75.8(2)   | C(43)-C(44)-C(45)-C(46)    | 69.6(4)     |
| O(6)-C(5)-C(19)-C(21)    | 169.96(19) | C(42)-C(43)-C(144)-C(145)  | -162.4(13)  |
| C(4)-C(5)-C(19)-C(21)    | 44.5(3)    | C(44)-C(43)-C(144)-C(145)  | 135(4)      |
| O(9)-C(5)-C(19)-C(20)    | 160.7(2)   | C(43)-C(144)-C(145)-C(146) | -176.2(16)  |
| O(6)-C(5)-C(19)-C(20)    | 46.4(3)    | O(59)-C(51)-O(52)-C(53)    | -51.8(2)    |
| C(4)-C(5)-C(19)-C(20)    | -79.0(3)   | C(58)-C(51)-O(52)-C(53)    | 67.3(2)     |
| O(9)-C(5)-C(19)-C(22)    | 42.2(3)    | C(61)-C(51)-O(52)-C(53)    | -165.73(19) |
| O(6)-C(5)-C(19)-C(22)    | -72.1(2)   | C(51)-O(52)-C(53)-C(54)    | 10.4(3)     |
| C(4)-C(5)-C(19)-C(22)    | 162.5(2)   | C(51)-O(52)-C(53)-C(65)    | -174.25(19) |
| C(8)-C(7)-C(23)-C(25)    | -112.1(6)  | O(52)-C(53)-C(54)-N(81)    | -172.2(2)   |
| O(6)-C(7)-C(23)-C(25)    | 62.9(6)    | C(65)-C(53)-C(54)-N(81)    | 13.4(4)     |
| C(123)-C(7)-C(23)-C(25)  | 64(27)     | O(52)-C(53)-C(54)-C(55)    | 12.5(4)     |
| C(8)-C(7)-C(23)-C(26)    | 131.1(8)   | C(65)-C(53)-C(54)-C(55)    | -162.0(2)   |
| O(6)-C(7)-C(23)-C(26)    | -53.9(9)   | C(53)-C(54)-C(55)-O(59)    | 6.9(3)      |
| C(123)-C(7)-C(23)-C(26)  | -53(27)    | N(81)-C(54)-C(55)-O(59)    | -168.6(2)   |
| C(8)-C(7)-C(23)-C(24)    | 7.7(8)     | C(53)-C(54)-C(55)-O(56)    | -111.3(3)   |
| O(6)-C(7)-C(23)-C(24)    | -177.2(7)  | N(81)-C(54)-C(55)-O(56)    | 73.2(3)     |
| C(123)-C(7)-C(23)-C(24)  | -177(100)  | C(53)-C(54)-C(55)-C(69)    | 125.8(3)    |
| C(8)-C(7)-C(123)-C(125)  | -123.4(12) | N(81)-C(54)-C(55)-C(69)    | -49.7(3)    |
| O(6)-C(7)-C(123)-C(125)  | 51.6(13)   | O(59)-C(55)-O(56)-C(57)    | -53.6(2)    |

|                          |             |                             |           |
|--------------------------|-------------|-----------------------------|-----------|
| C(54)-C(55)-O(56)-C(57)  | 65.1(3)     | C(58)-C(57)-C(73)-C(74)     | 95.7(5)   |
| C(69)-C(55)-O(56)-C(57)  | -166.66(19) | O(56)-C(57)-C(73)-C(74)     | -83.1(4)  |
| C(55)-O(56)-C(57)-C(58)  | 11.5(3)     | C(173)-C(57)-C(73)-C(74)    | 9(2)      |
| C(55)-O(56)-C(57)-C(73)  | -169.6(3)   | C(58)-C(57)-C(73)-C(75)     | -148.4(4) |
| C(55)-O(56)-C(57)-C(173) | 178.6(4)    | O(56)-C(57)-C(73)-C(75)     | 32.9(4)   |
| O(56)-C(57)-C(58)-N(91)  | -165.7(2)   | C(173)-C(57)-C(73)-C(75)    | 125(3)    |
| C(73)-C(57)-C(58)-N(91)  | 15.6(5)     | C(58)-C(57)-C(173)-C(175)   | 10.1(10)  |
| C(173)-C(57)-C(58)-N(91) | 29.8(6)     | O(56)-C(57)-C(173)-C(175)   | -155.6(6) |
| O(56)-C(57)-C(58)-C(51)  | 13.4(4)     | C(73)-C(57)-C(173)-C(175)   | 112(3)    |
| C(73)-C(57)-C(58)-C(51)  | -165.2(3)   | C(58)-C(57)-C(173)-C(174)   | -111.5(7) |
| C(173)-C(57)-C(58)-C(51) | -151.0(5)   | O(56)-C(57)-C(173)-C(174)   | 82.8(7)   |
| O(59)-C(51)-C(58)-C(57)  | 4.8(3)      | C(73)-C(57)-C(173)-C(174)   | -9(2)     |
| O(52)-C(51)-C(58)-C(57)  | -113.9(2)   | C(58)-C(57)-C(173)-C(176)   | 132.1(6)  |
| C(61)-C(51)-C(58)-C(57)  | 124.2(3)    | O(56)-C(57)-C(173)-C(176)   | -33.6(8)  |
| O(59)-C(51)-C(58)-N(91)  | -175.94(19) | C(73)-C(57)-C(173)-C(176)   | -126(3)   |
| O(52)-C(51)-C(58)-N(91)  | 65.3(3)     | C(53)-C(54)-N(81)-C(80)     | 93.0(3)   |
| C(61)-C(51)-C(58)-N(91)  | -56.6(3)    | C(55)-C(54)-N(81)-C(80)     | -91.5(3)  |
| O(56)-C(55)-O(59)-C(51)  | 73.7(2)     | C(54)-N(81)-C(80)-O(80)     | 164.1(3)  |
| C(54)-C(55)-O(59)-C(51)  | -48.3(2)    | C(54)-N(81)-C(80)-N(82)     | -17.2(4)  |
| C(69)-C(55)-O(59)-C(51)  | -173.34(19) | O(80)-C(80)-N(82)-C(81)     | 6.5(4)    |
| O(52)-C(51)-O(59)-C(55)  | 73.2(2)     | N(81)-C(80)-N(82)-C(81)     | -172.1(2) |
| C(58)-C(51)-O(59)-C(55)  | -47.4(2)    | C(80)-N(82)-C(81)-C(82)     | 78.1(3)   |
| C(61)-C(51)-O(59)-C(55)  | -172.54(19) | N(82)-C(81)-C(82)-C(83)     | -169.6(2) |
| O(59)-C(51)-C(61)-C(64)  | 74.2(2)     | C(81)-C(82)-C(83)-C(84)     | -69.3(3)  |
| O(52)-C(51)-C(61)-C(64)  | -170.6(2)   | C(82)-C(83)-C(84)-C(85)     | -173.3(2) |
| C(58)-C(51)-C(61)-C(64)  | -46.5(3)    | C(83)-C(84)-C(85)-C(86)     | 176.5(3)  |
| O(59)-C(51)-C(61)-C(62)  | -162.9(2)   | C(57)-C(58)-N(91)-C(90)     | 83.0(3)   |
| O(52)-C(51)-C(61)-C(62)  | -47.8(3)    | C(51)-C(58)-N(91)-C(90)     | -96.2(3)  |
| C(58)-C(51)-C(61)-C(62)  | 76.3(3)     | C(58)-N(91)-C(90)-O(90)     | -5.5(4)   |
| O(59)-C(51)-C(61)-C(63)  | -44.7(3)    | C(58)-N(91)-C(90)-N(92)     | 174.1(2)  |
| O(52)-C(51)-C(61)-C(63)  | 70.4(2)     | O(90)-C(90)-N(92)-C(191)    | -18.2(6)  |
| C(58)-C(51)-C(61)-C(63)  | -165.4(2)   | N(91)-C(90)-N(92)-C(191)    | 162.3(5)  |
| C(54)-C(53)-C(65)-C(67)  | -57.2(4)    | O(90)-C(90)-N(92)-C(91)     | -2.3(6)   |
| O(52)-C(53)-C(65)-C(67)  | 128.0(3)    | N(91)-C(90)-N(92)-C(91)     | 178.1(5)  |
| C(54)-C(53)-C(65)-C(66)  | -178.0(3)   | C(90)-N(92)-C(91)-C(92)     | -71.9(14) |
| O(52)-C(53)-C(65)-C(66)  | 7.1(3)      | C(191)-N(92)-C(91)-C(92)    | 48(6)     |
| C(54)-C(53)-C(65)-C(68)  | 64.9(4)     | N(92)-C(91)-C(92)-C(93)     | -58.4(18) |
| O(52)-C(53)-C(65)-C(68)  | -109.9(2)   | C(91)-C(92)-C(93)-C(94)     | 163.0(10) |
| O(59)-C(55)-C(69)-C(72)  | 75.9(3)     | C(92)-C(93)-C(94)-C(95)     | -169.7(9) |
| O(56)-C(55)-C(69)-C(72)  | -170.4(2)   | C(93)-C(94)-C(95)-C(96)     | 169(3)    |
| C(54)-C(55)-C(69)-C(72)  | -43.9(3)    | C(90)-N(92)-C(191)-C(192)   | -95.3(18) |
| O(59)-C(55)-C(69)-C(70)  | -160.5(2)   | C(91)-N(92)-C(191)-C(192)   | -164(9)   |
| O(56)-C(55)-C(69)-C(70)  | -46.8(3)    | N(92)-C(191)-C(192)-C(193)  | 61(2)     |
| C(54)-C(55)-C(69)-C(70)  | 79.7(3)     | C(191)-C(192)-C(193)-C(194) | -177.9(9) |
| O(59)-C(55)-C(69)-C(71)  | -42.7(3)    | C(192)-C(193)-C(194)-C(195) | 170.5(8)  |
| O(56)-C(55)-C(69)-C(71)  | 71.0(3)     | C(193)-C(194)-C(195)-C(196) | 177(3)    |
| C(54)-C(55)-C(69)-C(71)  | -162.5(2)   |                             |           |
| C(58)-C(57)-C(73)-C(76)  | -24.2(6)    |                             |           |
| O(56)-C(57)-C(73)-C(76)  | 157.1(4)    |                             |           |
| C(173)-C(57)-C(73)-C(76) | -111(3)     |                             |           |

**Table S4:** Crystal data and structure refinement for **5 (KRS45)**.

|                                   |                                                                                                                                                      |
|-----------------------------------|------------------------------------------------------------------------------------------------------------------------------------------------------|
| Crystal data                      |                                                                                                                                                      |
| Identification code               | KRS45                                                                                                                                                |
| Empirical formula                 | C <sub>26</sub> H <sub>44</sub> N <sub>2</sub> O <sub>7</sub>                                                                                        |
| Formula weight                    | 496.63                                                                                                                                               |
| Crystal description               | block, colourless                                                                                                                                    |
| Crystal size                      | 0.38 x 0.32 x 0.23mm                                                                                                                                 |
| Crystal system, space group       | monoclinic, C 2/c                                                                                                                                    |
| Unit cell dimensions:             | a 16.8698(6)Å                                                                                                                                        |
| b                                 | 10.4411(6)Å                                                                                                                                          |
| c                                 | 17.1497(7)Å                                                                                                                                          |
| β                                 | 113.903(3)°                                                                                                                                          |
| Volume                            | 2761.7(2)Å <sup>3</sup>                                                                                                                              |
| Z                                 | 4                                                                                                                                                    |
| Calculated density                | 1.194Mg/m <sup>3</sup>                                                                                                                               |
| F(000)                            | 1080                                                                                                                                                 |
| Linear absorption coefficient μ   | 0.086mm <sup>-1</sup>                                                                                                                                |
| Absorption correction             | semi-empirical from equivalents                                                                                                                      |
| Max. and min. transmission        | 0.7456 and 0.6336                                                                                                                                    |
| Unit cell determination           | 2.64° < Θ < 27.51°<br>5368 reflections used at 100K                                                                                                  |
| Data collection                   |                                                                                                                                                      |
| Temperature                       | 100K                                                                                                                                                 |
| Diffractometer                    | Bruker APEX-II CCD                                                                                                                                   |
| Radiation source                  | fine-focus sealed tube                                                                                                                               |
| Radiation and wavelength          | MoK <sub>α</sub> , 0.71073Å                                                                                                                          |
| Monochromator                     | graphite                                                                                                                                             |
| Scan type                         | φ and ω scans                                                                                                                                        |
| Θ range for data collection       | 2.36 to 27.50°                                                                                                                                       |
| Index ranges                      | -18 ≤ h ≤ 21, -13 ≤ k ≤ 13, -22 ≤ l ≤ 22                                                                                                             |
| Reflections collected / unique    | 11810 / 3165                                                                                                                                         |
| Significant unique reflections    | 2622 with I > 2σ(I)                                                                                                                                  |
| R(int), R(sigma)                  | 0.0254, 0.0222                                                                                                                                       |
| Completeness to Θ = 27.5°         | 99.7%                                                                                                                                                |
| Refinement                        |                                                                                                                                                      |
| Refinement method                 | Full-matrix least-squares on F <sup>2</sup>                                                                                                          |
| Data / parameters / restraints    | 3165 / 177 / 0                                                                                                                                       |
| Goodness-of-fit on F <sup>2</sup> | 1.045                                                                                                                                                |
| Final R indices [I > 2σ(I)]       | R1 = 0.0377, wR2 = 0.0964                                                                                                                            |
| R indices (all data)              | R1 = 0.0484, wR2 = 0.1058                                                                                                                            |
| Extinction expression             | none                                                                                                                                                 |
| Weighting scheme                  | w = 1/[σ <sup>2</sup> (F <sub>o</sub> <sup>2</sup> )+(aP) <sup>2</sup> +bP] where P = (F <sub>o</sub> <sup>2</sup> +2F <sub>c</sub> <sup>2</sup> )/3 |
| Weighting scheme parameters a, b  | 0.0505, 2.2527                                                                                                                                       |

Largest  $\Delta/\sigma$  in last cycle 0.001  
 Largest difference peak and hole 0.408 and  $-0.240\text{e}/\text{\AA}^3$   
 Structure Solution Program SHELXS-97 (Sheldrick, 2008)  
 Structure Refinement Program SHELXL-97 (Sheldrick, 2008)

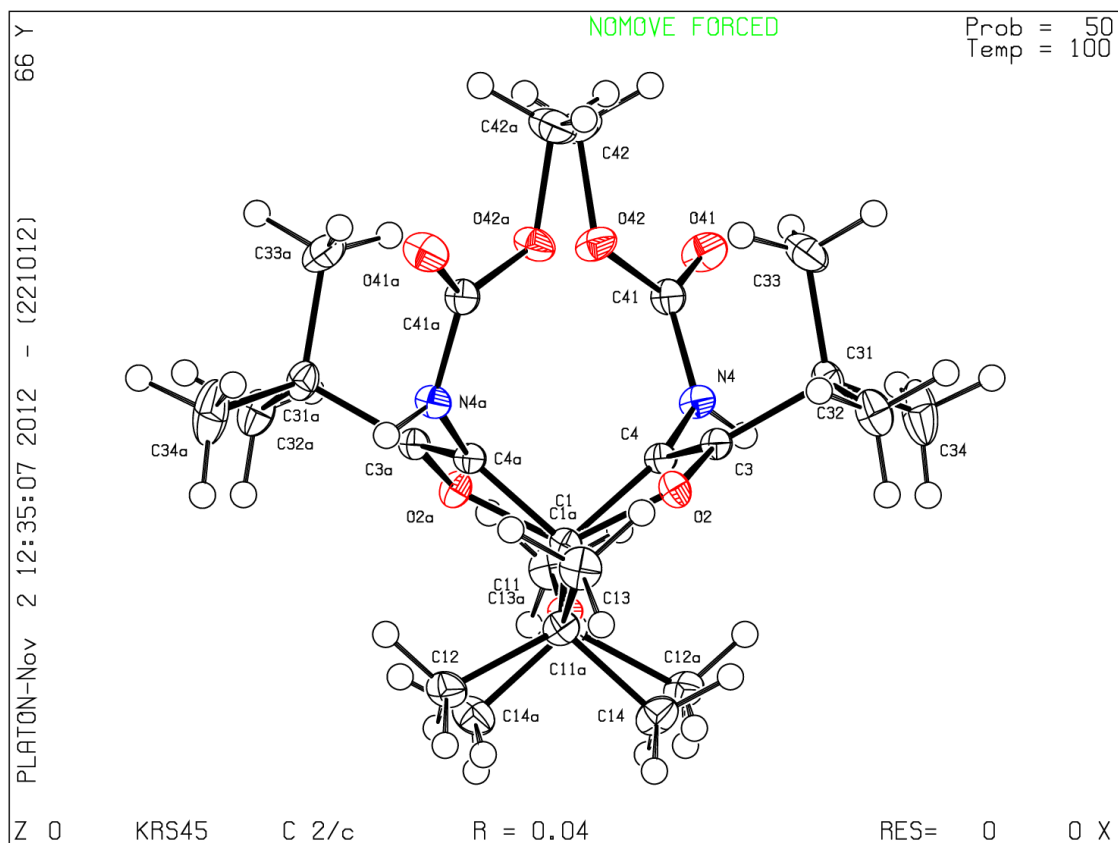

**Table S5:** Hydrogen bonds for **5 (KRS45)** [ $\text{\AA}$ ,  $^\circ$ ].

| D-H $\cdots$ A                         | d(D-H)    | d(H $\cdots$ A) | d(D $\cdots$ A) | $\angle$ (DHA) |
|----------------------------------------|-----------|-----------------|-----------------|----------------|
| N(4)-H(4) $\cdots$ O(41) <sup>i)</sup> | 0.871(17) | 2.022(17)       | 2.8905(13)      | 175.0(15)      |

Symmetry transformation used to generate the equivalent atom:

<sup>i)</sup>  $1/2-x, 3/2-y, 1-z$

**Table S6:** Full list of bond lengths [ $\text{\AA}$ ] and angles [ $^\circ$ ] for **5 (KRS45)**.

|                         |            |            |            |
|-------------------------|------------|------------|------------|
| C(1)-O(9)               | 1.4104(12) | O(2)-C(3)  | 1.3676(13) |
| C(1)-O(2)               | 1.4425(13) | C(3)-C(4)  | 1.3454(16) |
| C(1)-C(4) <sup>i)</sup> | 1.5252(15) | C(3)-C(31) | 1.5353(16) |
| C(1)-C(11)              | 1.5580(15) | C(4)-N(4)  | 1.4270(14) |

|                               |            |                     |            |
|-------------------------------|------------|---------------------|------------|
| C(4)-C(1) <sup>i</sup>        | 1.5252(15) | C(12)-C(11)-C(14)   | 109.22(10) |
| O(9)-C(1) <sup>i</sup>        | 1.4104(12) | C(13)-C(11)-C(14)   | 107.66(10) |
| C(11)-C(12)                   | 1.5353(16) | C(12)-C(11)-C(1)    | 109.36(9)  |
| C(11)-C(13)                   | 1.5415(17) | C(13)-C(11)-C(1)    | 112.22(9)  |
| C(11)-C(14)                   | 1.5439(16) | C(14)-C(11)-C(1)    | 107.95(9)  |
| C(12)-H(121)                  | 0.98       | C(11)-C(12)-H(121)  | 109.5      |
| C(12)-H(122)                  | 0.98       | C(11)-C(12)-H(122)  | 109.5      |
| C(12)-H(123)                  | 0.98       | H(121)-C(12)-H(122) | 109.5      |
| C(13)-H(131)                  | 0.98       | C(11)-C(12)-H(123)  | 109.5      |
| C(13)-H(132)                  | 0.98       | H(121)-C(12)-H(123) | 109.5      |
| C(13)-H(133)                  | 0.98       | H(122)-C(12)-H(123) | 109.5      |
| C(14)-H(141)                  | 0.98       | C(11)-C(13)-H(131)  | 109.5      |
| C(14)-H(142)                  | 0.98       | C(11)-C(13)-H(132)  | 109.5      |
| C(14)-H(143)                  | 0.98       | H(131)-C(13)-H(132) | 109.5      |
| C(31)-C(33)                   | 1.5324(18) | C(11)-C(13)-H(133)  | 109.5      |
| C(31)-C(34)                   | 1.5379(17) | H(131)-C(13)-H(133) | 109.5      |
| C(31)-C(32)                   | 1.5440(18) | H(132)-C(13)-H(133) | 109.5      |
| C(32)-H(321)                  | 0.98       | C(11)-C(14)-H(141)  | 109.5      |
| C(32)-H(322)                  | 0.98       | C(11)-C(14)-H(142)  | 109.5      |
| C(32)-H(323)                  | 0.98       | H(141)-C(14)-H(142) | 109.5      |
| C(33)-H(331)                  | 0.98       | C(11)-C(14)-H(143)  | 109.5      |
| C(33)-H(332)                  | 0.98       | H(141)-C(14)-H(143) | 109.5      |
| C(33)-H(333)                  | 0.98       | H(142)-C(14)-H(143) | 109.5      |
| C(34)-H(341)                  | 0.98       | C(33)-C(31)-C(3)    | 109.71(10) |
| C(34)-H(342)                  | 0.98       | C(33)-C(31)-C(34)   | 110.69(12) |
| C(34)-H(343)                  | 0.98       | C(3)-C(31)-C(34)    | 111.97(10) |
| N(4)-C(41)                    | 1.3462(15) | C(33)-C(31)-C(32)   | 107.76(11) |
| N(4)-H(4)                     | 0.871(17)  | C(3)-C(31)-C(32)    | 109.71(10) |
| C(41)-O(41)                   | 1.2259(14) | C(34)-C(31)-C(32)   | 106.86(11) |
| C(41)-O(42)                   | 1.3474(14) | C(31)-C(32)-H(321)  | 109.5      |
| O(42)-C(42)                   | 1.4433(15) | C(31)-C(32)-H(322)  | 109.5      |
| C(42)-H(421)                  | 0.98       | H(321)-C(32)-H(322) | 109.5      |
| C(42)-H(422)                  | 0.98       | C(31)-C(32)-H(323)  | 109.5      |
| C(42)-H(423)                  | 0.98       | H(321)-C(32)-H(323) | 109.5      |
|                               |            | H(322)-C(32)-H(323) | 109.5      |
| O(9)-C(1)-O(2)                | 108.47(8)  | C(31)-C(33)-H(331)  | 109.5      |
| O(9)-C(1)-C(4) <sup>i</sup>   | 107.85(8)  | C(31)-C(33)-H(332)  | 109.5      |
| O(2)-C(1)-C(4) <sup>i</sup>   | 112.01(9)  | H(331)-C(33)-H(332) | 109.5      |
| O(9)-C(1)-C(11)               | 106.05(9)  | C(31)-C(33)-H(333)  | 109.5      |
| O(2)-C(1)-C(11)               | 105.09(9)  | H(331)-C(33)-H(333) | 109.5      |
| C(4) <sup>i</sup> -C(1)-C(11) | 116.97(9)  | H(332)-C(33)-H(333) | 109.5      |
| C(3)-O(2)-C(1)                | 115.57(8)  | C(31)-C(34)-H(341)  | 109.5      |
| C(4)-C(3)-O(2)                | 120.60(10) | C(31)-C(34)-H(342)  | 109.5      |
| C(4)-C(3)-C(31)               | 128.61(10) | H(341)-C(34)-H(342) | 109.5      |
| O(2)-C(3)-C(31)               | 110.79(9)  | C(31)-C(34)-H(343)  | 109.5      |
| C(3)-C(4)-N(4)                | 120.75(10) | H(341)-C(34)-H(343) | 109.5      |
| C(3)-C(4)-C(1) <sup>i</sup>   | 120.76(10) | H(342)-C(34)-H(343) | 109.5      |
| N(4)-C(4)-C(1) <sup>i</sup>   | 118.23(9)  | C(41)-N(4)-C(4)     | 126.74(10) |
| C(1)-O(9)-C(1) <sup>i</sup>   | 111.46(12) | C(41)-N(4)-H(4)     | 113.3(11)  |
| C(12)-C(11)-C(13)             | 110.35(9)  | C(4)-N(4)-H(4)      | 119.9(11)  |



O(41)-C(41)-N(4) 123.53(11)  
O(41)-C(41)-O(42) 122.65(11)  
N(4)-C(41)-O(42) 113.81(10)  
C(41)-O(42)-C(42) 114.05(9)  
O(42)-C(42)-H(421) 109.5  
O(42)-C(42)-H(422) 109.5  
H(421)-C(42)-H(422) 109.5  
O(42)-C(42)-H(423) 109.5  
H(421)-C(42)-H(423) 109.5  
H(422)-C(42)-H(423) 109.5

O(9)-C(1)-O(2)-C(3) 44.14(12)  
C(4)<sup>i</sup>-C(1)-O(2)-C(3) -74.79(11)  
C(11)-C(1)-O(2)-C(3) 157.22(9)  
C(1)-O(2)-C(3)-C(4) -4.84(14)  
C(1)-O(2)-C(3)-C(31) 175.67(9)  
O(2)-C(3)-C(4)-N(4) 173.72(9)  
C(31)-C(3)-C(4)-N(4) -6.89(18)  
O(2)-C(3)-C(4)-C(1)<sup>i</sup> -12.22(16)  
C(31)-C(3)-C(4)-C(1)<sup>i</sup> 167.16(10)  
O(2)-C(1)-O(9)-C(1)<sup>i</sup> -70.04(7)  
C(4)<sup>i</sup>-C(1)-O(9)-C(1)<sup>i</sup> 51.47(6)  
C(11)-C(1)-O(9)-C(1)<sup>i</sup> 177.52(10)  
O(9)-C(1)-C(11)-C(12) -66.28(10)  
O(2)-C(1)-C(11)-C(12) 178.95(9)  
C(4)<sup>i</sup>-C(1)-C(11)-C(12) 54.01(13)  
O(9)-C(1)-C(11)-C(13) 170.93(8)  
O(2)-C(1)-C(11)-C(13) 56.15(11)  
C(4)<sup>i</sup>-C(1)-C(11)-C(13) -68.78(13)  
O(9)-C(1)-C(11)-C(14) 52.45(11)  
O(2)-C(1)-C(11)-C(14) -62.32(11)  
C(4)<sup>i</sup>-C(1)-C(11)-C(14) 172.74(10)  
C(4)-C(3)-C(31)-C(33) 76.50(15)  
O(2)-C(3)-C(31)-C(33) -104.07(12)  
C(4)-C(3)-C(31)-C(34) -46.82(17)  
O(2)-C(3)-C(31)-C(34) 132.61(12)  
C(4)-C(3)-C(31)-C(32) -165.30(12)  
O(2)-C(3)-C(31)-C(32) 14.14(13)  
C(3)-C(4)-N(4)-C(41) -86.47(15)  
C(1)<sup>i</sup>-C(4)-N(4)-C(41) 99.33(13)  
C(4)-N(4)-C(41)-O(41) 178.45(11)  
C(4)-N(4)-C(41)-O(42) -0.77(17)  
O(41)-C(41)-O(42)-C(42) -8.14(17)  
N(4)-C(41)-O(42)-C(42) 171.08(11)

---

Symmetry transformation used to generate  
equivalent atoms:

<sup>i</sup>) 1-x, y, 3/2-z

## Calculated Energies and Cartesian Coordinates (B3LYP/6-31G\*\*)

Calculations were carried out at the B3LYP/6-31G\*\* level using the Gaussian suite of programs [6]. The temperature used was 298.15 K, and calculated wavenumbers were scaled by a factor 0.9613 [7].

**Table S7:** Summary of calculated energies (B3LYP/6-31G\*\*), energy difference (kcal/mol) with respect to the most stable isomer, point group symmetry and strongest calculated IR frequencies (B3LYP/6-31G\*\*, scaled by 0.9613, percent relative intensity).

|             | HF +ZPVE<br>(Hartree) | $\Delta E$ (kcal/mol)<br>cf. most stable<br>isomer (bold) | Sym. | Strongest calculated IR ( $\text{cm}^{-1}$ )<br>(scaled 0.9613, percent relative intensity) |
|-------------|-----------------------|-----------------------------------------------------------|------|---------------------------------------------------------------------------------------------|
| <b>3</b>    | -1620.615076          |                                                           | C2   | 1714.6(82), 1581.8(65), 1274.2, 1233.5(71), 1071.4(100)                                     |
| <b>4a</b>   | -2005.867297          | <b>0.0</b>                                                | C1   | 1703.9(53), 1679.5(47), 1514.6(100)                                                         |
| <b>4b</b>   | -2005.861057          | 3.9                                                       | C2   | 1711.4(100), 1499.1(73)                                                                     |
| <b>4c</b>   | -2005.858582          | 5.5                                                       | C1   | 1718.2(65), 1495.0(63), 1493.2(100), 1172.3(60)                                             |
| <b>5</b>    | -1652.720565          |                                                           | C2   | 1738.7(100), 1327.0(62)                                                                     |
| <b>7a-a</b> | -3263.911428          | <b>0.0</b>                                                | C1   | 1658.8(31), 1587.7(37), 1491.0(100), 1256.7(66)                                             |
| <b>7a-b</b> | -3263.891924          | 12.2                                                      | C1   | 1662.1(48), 1587.2(42), 1491.6(100), 1255.9(63)                                             |
| <b>7a-c</b> | -3263.877985          | 21.0                                                      | C2   | 1661.2(50), 1589.6(38), 1494.7(61), 1253.8(100)                                             |
| <b>7c-a</b> | -3876.272146          | <b>0.0</b>                                                | C2   | 1662.8(37), 1589.1(41), 1496.7(100), 1249.4(48)                                             |
| <b>7c-b</b> | -3876.252573          | 12.3                                                      | C1   | 1657.3(47), 1587.8(48), 1498.8(95), 1247.6(100)                                             |
| <b>7c-c</b> | -3876.245337          | 16.8                                                      | C1   | 1660.5(30), 1588.4(31), 1507.3(38), 1245.9(100)                                             |

### Diethyl 1,3,5,7-tetra-tert-butyl-2,6,9-trioxabicyclo[3.3.1]nona-3,7-diene-4,8-dicarboxylate, Compound 3.

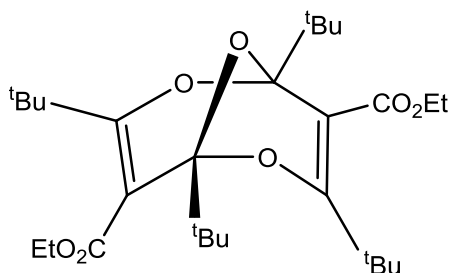

| Atom<br>Type | Coordinates (Angstroms) |             |             |
|--------------|-------------------------|-------------|-------------|
|              | X                       | Y           | Z           |
| C            | -1.09168697             | 0.39458963  | 1.12686954  |
| O            | -1.63768341             | -0.79839643 | 0.53528113  |
| C            | -0.74006755             | -1.56240134 | -0.14555470 |
| C            | 0.59312878              | -1.36109253 | 0.03499945  |
| O            | 0.00000000              | 0.00000000  | 1.92385888  |
| C            | -2.17346754             | 0.94931438  | 2.11566018  |
| C            | -1.65951850             | 2.25684407  | 2.74880141  |
| H            | -2.38183761             | 2.61119878  | 3.49174676  |
| H            | -1.53132282             | 3.04290641  | 1.99991308  |
| H            | -0.70161477             | 2.10367685  | 3.25228831  |
| C            | -3.52122052             | 1.20980213  | 1.41211851  |
| H            | -4.27768763             | 1.42538335  | 2.17365022  |
| H            | -3.85303261             | 0.34327669  | 0.83695168  |

|   |             |             |             |
|---|-------------|-------------|-------------|
| H | -3.48464649 | 2.07572127  | 0.74909613  |
| C | -2.41006480 | -0.09845144 | 3.22700146  |
| H | -3.17690500 | 0.27310561  | 3.91460821  |
| H | -1.50196115 | -0.28943619 | 3.80156662  |
| H | -2.75737249 | -1.04687237 | 2.80949852  |
| C | -1.46117664 | -2.56620223 | -1.06904189 |
| C | -1.28642001 | -3.99860298 | -0.51178241 |
| H | -1.82043453 | -4.70976365 | -1.15198495 |
| H | -1.70884165 | -4.07448115 | 0.49578187  |
| H | -0.23675778 | -4.28931049 | -0.46599166 |
| C | -2.97293777 | -2.24985704 | -1.12859566 |
| H | -3.45170860 | -2.96563487 | -1.80501019 |
| H | -3.15213511 | -1.23935084 | -1.50060268 |
| H | -3.44585402 | -2.34435073 | -0.14830405 |
| C | -0.92121690 | -2.46909502 | -2.51508489 |
| H | -1.52357975 | -3.11163877 | -3.16601093 |
| H | 0.11456433  | -2.79716905 | -2.60876743 |
| H | -0.99708225 | -1.44298145 | -2.88575791 |
| C | 1.63336413  | -1.88724727 | -0.89806256 |
| O | 2.28250943  | -1.18715898 | -1.65038735 |
| O | 1.82870446  | -3.22760180 | -0.81188067 |
| C | 2.82567178  | -3.77782814 | -1.70938466 |
| H | 3.77638452  | -3.26674082 | -1.53067052 |
| H | 2.52759912  | -3.56363782 | -2.74079174 |
| C | 2.91554644  | -5.26673662 | -1.43783705 |
| H | 3.66761364  | -5.71669377 | -2.09331557 |
| H | 1.95791045  | -5.76035910 | -1.62591133 |
| H | 3.20485938  | -5.45929629 | -0.40086522 |
| C | 1.09168697  | -0.39458963 | 1.12686954  |
| O | 1.63768341  | 0.79839643  | 0.53528113  |
| C | 0.74006755  | 1.56240134  | -0.14555470 |
| C | -0.59312878 | 1.36109253  | 0.03499945  |
| C | 2.17346754  | -0.94931438 | 2.11566018  |
| C | 1.65951850  | -2.25684407 | 2.74880141  |
| H | 2.38183761  | -2.61119878 | 3.49174676  |
| H | 1.53132282  | -3.04290641 | 1.99991308  |
| H | 0.70161477  | -2.10367685 | 3.25228831  |
| C | 3.52122052  | -1.20980213 | 1.41211851  |
| H | 4.27768763  | -1.42538335 | 2.17365022  |
| H | 3.85303261  | -0.34327669 | 0.83695168  |
| H | 3.48464649  | -2.07572127 | 0.74909613  |
| C | 2.41006480  | 0.09845144  | 3.22700146  |
| H | 3.17690500  | -0.27310561 | 3.91460821  |
| H | 1.50196115  | 0.28943619  | 3.80156662  |
| H | 2.75737249  | 1.04687237  | 2.80949852  |
| C | 1.46117664  | 2.56620223  | -1.06904189 |
| C | 1.28642001  | 3.99860298  | -0.51178241 |
| H | 1.82043453  | 4.70976365  | -1.15198495 |
| H | 1.70884165  | 4.07448115  | 0.49578187  |
| H | 0.23675778  | 4.28931049  | -0.46599166 |
| C | 2.97293777  | 2.24985704  | -1.12859566 |
| H | 3.45170860  | 2.96563487  | -1.80501019 |
| H | 3.15213511  | 1.23935084  | -1.50060268 |
| H | 3.44585402  | 2.34435073  | -0.14830405 |
| C | 0.92121690  | 2.46909502  | -2.51508489 |
| H | 1.52357975  | 3.11163877  | -3.16601093 |
| H | -0.11456433 | 2.79716905  | -2.60876743 |
| H | 0.99708225  | 1.44298145  | -2.88575791 |
| C | -1.63336413 | 1.88724727  | -0.89806256 |
| O | -2.28250943 | 1.18715898  | -1.65038735 |
| O | -1.82870446 | 3.22760180  | -0.81188067 |

|   |             |            |             |
|---|-------------|------------|-------------|
| C | -2.82567178 | 3.77782814 | -1.70938466 |
| H | -3.77638452 | 3.26674082 | -1.53067052 |
| H | -2.52759912 | 3.56363782 | -2.74079174 |
| C | -2.91554644 | 5.26673662 | -1.43783705 |
| H | -3.66761364 | 5.71669377 | -2.09331557 |
| H | -1.95791045 | 5.76035910 | -1.62591133 |
| H | -3.20485938 | 5.45929629 | -0.40086522 |

Point Group= C2. State= 1-A.

HF= -1621.3221448. RMSD=5.068e-09. RMSF=3.221e-06.

Zero-point correction= 0.707069 (Hartree/Particle)

Sum of electronic and zero-point Energies= -1620.615076

Calculated IR spectrum (unscaled Harmonic frequencies (cm-1)):

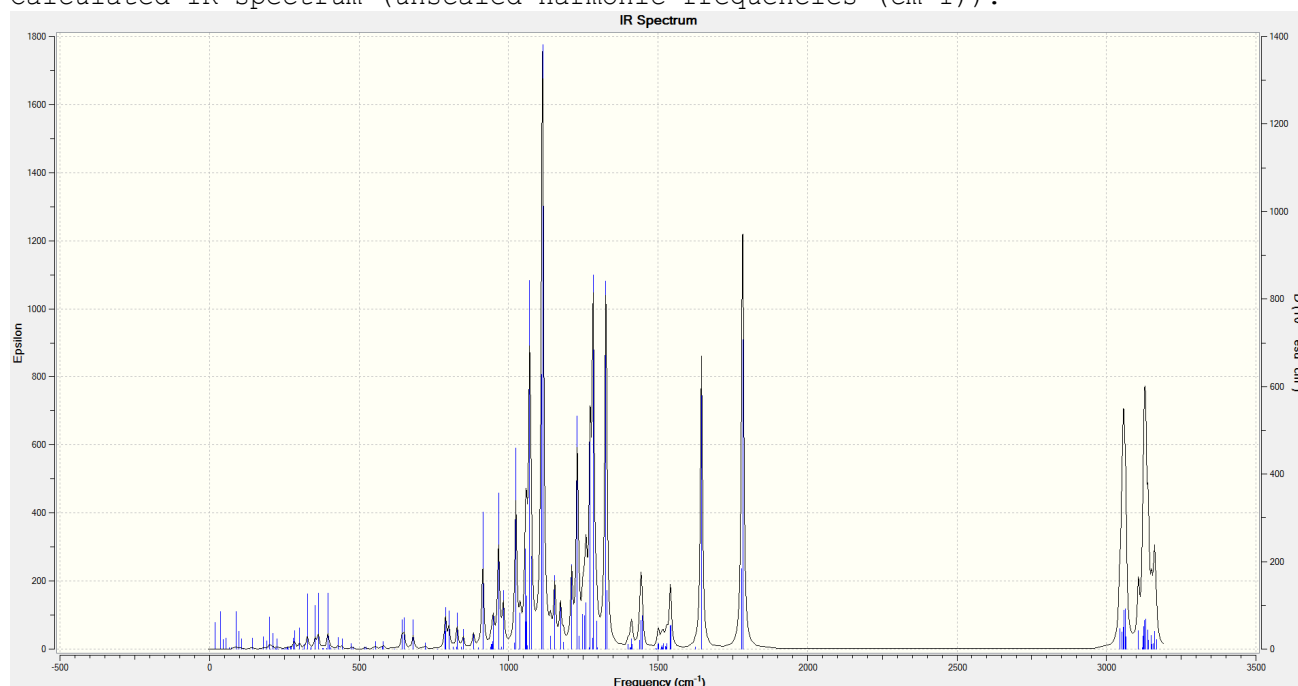

### 1,3,5,7-Tetra-*tert*-butyl-2,6,9-trioxabi-cyclo[3.3.1]nona-3,7-diene-4,8-diyl-bis(3-hexylurea), Compound 4a.

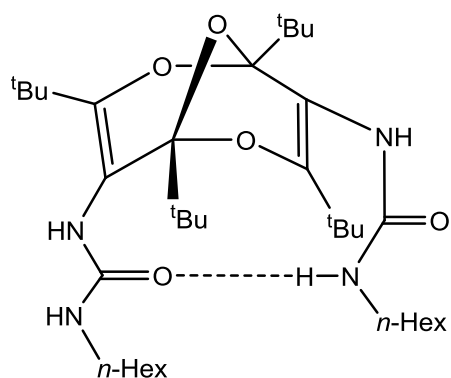

| Atom Type | X | Y | Z |
|-----------|---|---|---|
|-----------|---|---|---|

|   |             |             |             |
|---|-------------|-------------|-------------|
| C | -2.84191486 | -1.19508722 | 0.80057798  |
| O | -2.41684378 | -0.28368742 | 1.82371917  |
| C | -2.13101120 | 0.98937384  | 1.40733771  |
| C | -2.38561749 | 1.35736929  | 0.12311037  |
| C | -3.27073081 | 0.46841700  | -0.77203119 |
| O | -2.51632094 | -0.17800679 | -1.82521447 |
| C | -1.68012783 | -1.17460165 | -1.42566492 |
| C | -1.68892158 | -1.58247890 | -0.13068143 |
| O | -3.83237984 | -0.55374956 | 0.02609594  |
| C | -3.56725457 | -2.37851105 | 1.54198385  |
| C | -2.73997994 | -2.92358801 | 2.72662040  |
| C | -3.87151572 | -3.50580794 | 0.53744057  |
| C | -4.90182990 | -1.85633908 | 2.12329453  |
| C | -1.60213619 | 1.78618327  | 2.61095103  |
| C | -2.75591145 | 1.83395038  | 3.64894917  |
| C | -1.17689764 | 3.23577799  | 2.31724513  |
| C | -0.39714041 | 1.03989013  | 3.23202754  |
| C | -4.47378939 | 1.17834702  | -1.49204592 |
| C | -4.01757769 | 2.01101418  | -2.71191686 |
| C | -5.23472951 | 2.06178624  | -0.48335821 |
| C | -5.44524057 | 0.09618519  | -2.02016819 |
| C | -0.84938391 | -1.68115598 | -2.61574608 |
| C | -0.24757609 | -3.08549034 | -2.40374253 |
| C | -1.79300423 | -1.77389034 | -3.84401752 |
| C | 0.28192461  | -0.67813700 | -2.92871732 |
| N | -1.94752188 | 2.59559997  | -0.40214075 |
| O | -0.71213811 | 2.93094446  | -0.96029971 |
| O | -0.60152780 | 3.99735063  | -1.56590703 |
| N | 0.31065076  | 2.05134141  | -0.75631384 |
| C | 1.65179055  | 2.33446414  | -1.24177454 |
| C | 2.68045768  | 2.46178633  | -0.11129946 |
| C | 4.10349966  | 2.69790659  | -0.63087728 |
| C | 5.14667375  | 2.82858322  | 0.48540086  |
| C | 6.57534957  | 3.04710896  | -0.02731315 |
| C | 7.60783990  | 3.18483482  | 1.09564043  |
| N | -0.62040174 | -2.34463797 | 0.40374986  |
| C | 0.60014306  | -1.79140810 | 0.74763852  |
| O | 0.90167603  | -0.61473328 | 0.53211329  |
| N | 1.46442327  | -2.67064719 | 1.35777955  |
| C | 2.85670875  | -2.30977565 | 1.60352081  |
| C | 3.78679618  | -2.57381908 | 0.41229953  |
| C | 5.24310976  | -2.18853359 | 0.69778012  |
| C | 6.18236460  | -2.44797676 | -0.48637576 |
| C | 7.63843198  | -2.05154889 | -0.21345435 |
| C | 8.56884927  | -2.31701959 | -1.40063007 |
| H | -2.50574695 | -2.13228534 | 3.44127412  |
| H | -3.32695344 | -3.68794242 | 3.24660559  |
| H | -1.79741475 | -3.38790046 | 2.42987263  |
| H | -4.41887031 | -3.12122553 | -0.32689126 |
| H | -2.96345514 | -3.99336083 | 0.16654395  |
| H | -4.48578880 | -4.27502933 | 1.01674487  |
| H | -4.73594273 | -1.00209499 | 2.78446037  |
| H | -5.59285415 | -1.54927658 | 1.33697131  |
| H | -5.37739304 | -2.65153198 | 2.70686192  |
| H | -2.41766741 | 2.36499153  | 4.54495667  |
| H | -3.62365552 | 2.36796594  | 3.24753078  |
| H | -3.07475442 | 0.83244397  | 3.94494153  |
| H | -0.32321289 | 3.28629316  | 1.64022023  |
| H | -1.98807550 | 3.83050824  | 1.89382700  |
| H | -0.88033704 | 3.69938511  | 3.26485161  |
| H | 0.42099766  | 0.94532024  | 2.51402080  |

|   |             |             |             |
|---|-------------|-------------|-------------|
| H | -0.03584986 | 1.59680674  | 4.10309937  |
| H | -0.67419036 | 0.03548134  | 3.55927162  |
| H | -3.56712946 | 1.37055908  | -3.47328786 |
| H | -4.89634840 | 2.49090968  | -3.15600973 |
| H | -3.29480150 | 2.79076743  | -2.47350322 |
| H | -4.65705404 | 2.93096153  | -0.15469442 |
| H | -6.15183745 | 2.43932061  | -0.94672899 |
| H | -5.51470585 | 1.48969986  | 0.40542991  |
| H | -4.92589384 | -0.61912470 | -2.66276251 |
| H | -5.92348981 | -0.45510810 | -1.20875117 |
| H | -6.22891106 | 0.57826665  | -2.61364160 |
| H | 0.15822288  | -3.43871090 | -3.35757640 |
| H | 0.56597436  | -3.09445059 | -1.67802626 |
| H | -1.00782777 | -3.80462838 | -2.08108437 |
| H | -1.22556627 | -2.14712513 | -4.70237461 |
| H | -2.62104309 | -2.46679874 | -3.65941440 |
| H | -2.21354917 | -0.80306128 | -4.10705906 |
| H | 0.82370990  | -0.99847060 | -3.82560883 |
| H | -0.11918329 | 0.32242877  | -3.10663077 |
| H | 0.98652455  | -0.61938471 | -2.09594042 |
| H | -2.62711534 | 3.31135991  | -0.61411257 |
| H | 0.16052591  | 1.17621569  | -0.26449634 |
| H | 1.96780960  | 1.54160485  | -1.93321803 |
| H | 1.58678127  | 3.26366603  | -1.81256949 |
| H | 2.65463095  | 1.54685174  | 0.49450524  |
| H | 2.38233575  | 3.28748237  | 0.54787685  |
| H | 4.12065209  | 3.60562258  | -1.25070441 |
| H | 4.38950616  | 1.87143768  | -1.29784163 |
| H | 4.86813748  | 3.66144361  | 1.14657164  |
| H | 5.12214535  | 1.92557685  | 1.11328853  |
| H | 6.59902990  | 3.94595186  | -0.65819889 |
| H | 6.85623418  | 2.21111671  | -0.68280950 |
| H | 8.61623804  | 3.33948312  | 0.69797070  |
| H | 7.37327746  | 4.03478683  | 1.74646436  |
| H | 7.63264749  | 2.28713536  | 1.72436545  |
| H | -0.80112978 | -3.29170675 | 0.70422320  |
| H | 1.24996395  | -3.65674113 | 1.31527491  |
| H | 2.86734208  | -1.24833057 | 1.86009788  |
| H | 3.19703483  | -2.86562282 | 2.48497673  |
| H | 3.41388866  | -2.00697130 | -0.44936377 |
| H | 3.73397155  | -3.63722062 | 0.13803612  |
| H | 5.28848813  | -1.12478691 | 0.97057279  |
| H | 5.60442280  | -2.74316019 | 1.57586292  |
| H | 6.14147801  | -3.51312034 | -0.75627229 |
| H | 5.81633994  | -1.89902086 | -1.36543591 |
| H | 7.67844605  | -0.98650310 | 0.05223880  |
| H | 8.00331014  | -2.59739490 | 0.66734274  |
| H | 9.59875981  | -2.02177034 | -1.17600232 |
| H | 8.57847765  | -3.38012243 | -1.66715949 |
| H | 8.24887454  | -1.75819787 | -2.28731540 |

Point Group= C1. State= 1-A.

HF=-2006.8620195. RMSD=7.478e-09. RMSF=3.802e-06.

Zero-point correction= 0.994722 (Hartree/Particle)

Sum of electronic and zero-point Energies= -2005.867297

Calculated IR spectrum (unscaled Harmonic frequencies (cm-1)):

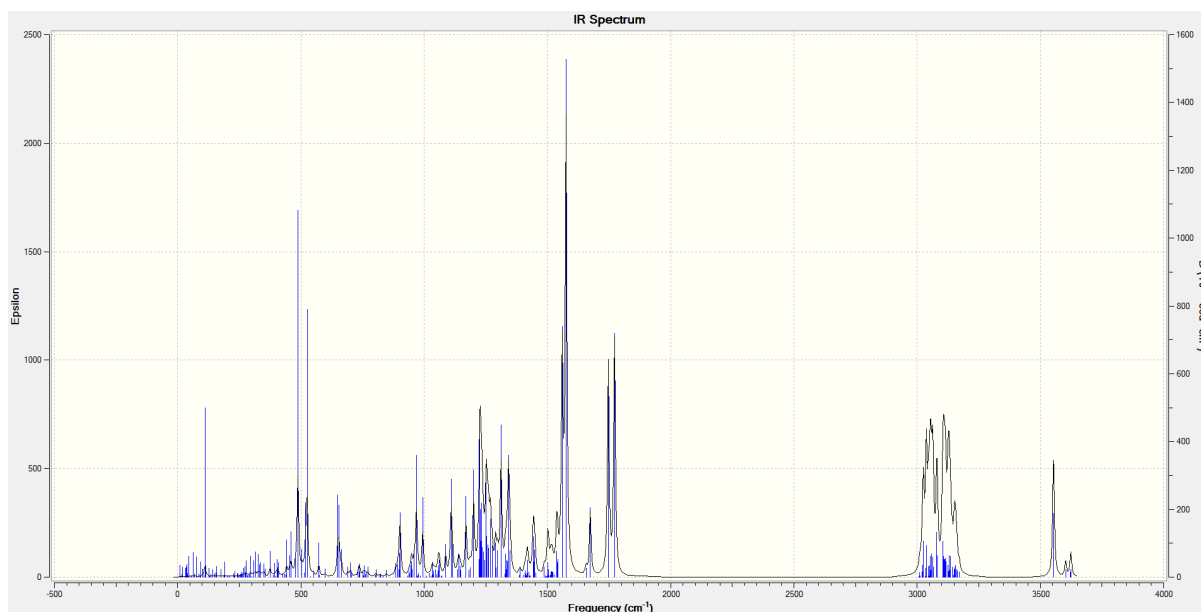

**1,3,5,7-Tetra-*tert*-butyl-2,6,9-trioxabi-cyclo[3.3.1]nona-3,7-diene-4,8-diyl-bis(3-hexylurea), Compound 4b.**

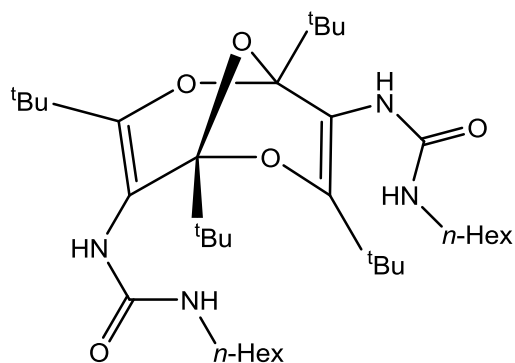

| Atom Type | Coordinates (Angstroms) |             |             |
|-----------|-------------------------|-------------|-------------|
|           | X                       | Y           | Z           |
| C         | 2.91042338              | -1.15321222 | -0.21277161 |
| O         | 2.24528094              | -1.00690465 | -1.49316968 |
| C         | 1.70636806              | 0.20669820  | -1.77002154 |
| C         | 1.89148359              | 1.26467786  | -0.93151890 |
| C         | 2.91042345              | 1.15321204  | 0.21277152  |
| O         | 2.24528100              | 1.00690451  | 1.49316958  |
| C         | 1.70636805              | -0.20669830 | 1.77002145  |
| C         | 1.89148351              | -1.26467798 | 0.93151881  |
| O         | 3.69358956              | -0.00000012 | -0.00000005 |
| C         | 3.92527912              | -2.33958607 | -0.39203228 |
| C         | 3.25456143              | -3.61738600 | -0.94452448 |
| H         | 2.71843703              | -3.41004468 | -1.87339656 |
| H         | 4.03734110              | -4.34952294 | -1.16948018 |
| H         | 2.55690229              | -4.09005180 | -0.25360539 |
| C         | 4.62311521              | -2.63442379 | 0.95047142  |
| H         | 5.10619619              | -1.73967484 | 1.35147331  |
| H         | 3.93677114              | -3.01700046 | 1.71166682  |
| H         | 5.39364177              | -3.39733635 | 0.80076481  |
| C         | 5.00217972              | -1.90858768 | -1.41624748 |
| H         | 4.55145444              | -1.65278747 | -2.37852444 |

|   |             |             |             |
|---|-------------|-------------|-------------|
| H | 5.57767507  | -1.04977268 | -1.06716587 |
| H | 5.69416554  | -2.74084431 | -1.57831545 |
| C | 0.96266520  | 0.19790105  | -3.12360507 |
| C | 1.65018692  | 1.18714980  | -4.09353640 |
| H | 1.17864234  | 1.12123133  | -5.07983528 |
| H | 1.56247967  | 2.21962639  | -3.75124544 |
| H | 2.71144745  | 0.94656184  | -4.21279996 |
| C | -0.52265008 | 0.58881103  | -2.95218576 |
| H | -1.03836463 | -0.10015574 | -2.27464985 |
| H | -0.64080436 | 1.60332214  | -2.57355459 |
| H | -1.02653474 | 0.52792019  | -3.92272829 |
| C | 1.01145448  | -1.20960774 | -3.75819838 |
| H | 0.55207880  | -1.96183809 | -3.11284473 |
| H | 0.46423229  | -1.18594513 | -4.70597719 |
| H | 2.03591593  | -1.52710868 | -3.96685919 |
| C | 3.92527928  | 2.33958583  | 0.39203219  |
| C | 3.25456167  | 3.61738580  | 0.94452439  |
| H | 2.71843725  | 3.41004450  | 1.87339646  |
| H | 4.03734138  | 4.34952269  | 1.16948009  |
| H | 2.55690256  | 4.09005164  | 0.25360530  |
| C | 4.62311538  | 2.63442349  | -0.95047151 |
| H | 3.93677134  | 3.01700021  | -1.71166691 |
| H | 5.39364199  | 3.39733600  | -0.80076490 |
| H | 5.10619630  | 1.73967451  | -1.35147340 |
| C | 5.00217984  | 1.90858736  | 1.41624739  |
| H | 4.55145455  | 1.65278718  | 2.37852435  |
| H | 5.57767514  | 1.04977233  | 1.06716578  |
| H | 5.69416571  | 2.74084395  | 1.57831536  |
| C | 0.96266519  | -0.19790111 | 3.12360498  |
| C | 1.65018684  | -1.18714990 | 4.09353631  |
| H | 1.17864227  | -1.12123140 | 5.07983518  |
| H | 1.56247952  | -2.21962648 | 3.75124535  |
| H | 2.71144739  | -0.94656202 | 4.21279987  |
| C | 1.01145456  | 1.20960768  | 3.75819829  |
| H | 0.46423237  | 1.18594510  | 4.70597710  |
| H | 2.03591603  | 1.52710855  | 3.96685910  |
| H | 0.55207893  | 1.96183806  | 3.11284463  |
| C | -0.52265012 | -0.58881099 | 2.95218567  |
| H | -1.02653477 | -0.52792011 | 3.92272820  |
| H | -1.03836462 | 0.10015582  | 2.27464976  |
| H | -0.64080447 | -1.60332209 | 2.57355450  |
| N | 1.29058282  | 2.52292704  | -1.22017241 |
| H | 1.84653494  | 3.21968581  | -1.69861946 |
| C | 0.23862289  | 3.14626130  | -0.54841750 |
| O | 0.03701976  | 4.34869834  | -0.69936527 |
| N | -0.53145260 | 2.34175592  | 0.24872922  |
| H | -0.36729125 | 1.34714238  | 0.20752574  |
| C | -1.77783488 | 2.83331489  | 0.82001120  |
| H | -1.91936736 | 2.36373578  | 1.80096785  |
| H | -1.64210212 | 3.90512433  | 0.98212927  |
| C | -3.00706012 | 2.58993526  | -0.06579410 |
| H | -3.10653442 | 1.51299892  | -0.26522070 |
| H | -2.83669312 | 3.07497724  | -1.03482676 |
| C | -4.30226217 | 3.11782865  | 0.56210264  |
| H | -4.19746719 | 4.19499139  | 0.75263668  |
| H | -4.45072736 | 2.64856045  | 1.54550707  |
| C | -5.54309396 | 2.87509842  | -0.30569017 |
| H | -5.39339662 | 3.33992631  | -1.29039919 |
| H | -5.65044822 | 1.79688343  | -0.49335719 |
| C | -6.83934604 | 3.41072539  | 0.31469063  |
| H | -6.73202951 | 4.48790308  | 0.50070959  |



|   |             |             |             |
|---|-------------|-------------|-------------|
| H | -6.98741391 | 2.94689361  | 1.29945590  |
| C | -8.07357653 | 3.16338318  | -0.55770812 |
| H | -8.98121317 | 3.55738378  | -0.08922039 |
| H | -7.96921628 | 3.64449549  | -1.53681125 |
| H | -8.22778389 | 2.09239247  | -0.73211624 |
| N | 1.29058266  | -2.52292712 | 1.22017232  |
| H | 1.84653473  | -3.21968592 | 1.69861937  |
| C | 0.23862268  | -3.14626131 | 0.54841740  |
| O | 0.03701947  | -4.34869834 | 0.69936518  |
| N | -0.53145276 | -2.34175588 | -0.24872931 |
| H | -0.36729134 | -1.34714235 | -0.20752583 |
| C | -1.77783506 | -2.83331477 | -0.82001129 |
| H | -1.91936751 | -2.36373565 | -1.80096795 |
| H | -1.64210238 | -3.90512422 | -0.98212936 |
| C | -3.00706029 | -2.58993506 | 0.06579401  |
| H | -3.10653452 | -1.51299871 | 0.26522060  |
| H | -2.83669332 | -3.07497705 | 1.03482667  |
| C | -4.30226238 | -3.11782837 | -0.56210273 |
| H | -4.45072753 | -2.64856016 | -1.54550716 |
| H | -4.19746746 | -4.19499111 | -0.75263677 |
| H | -6.98741410 | -2.94689315 | -1.29945599 |
| C | -5.54309415 | -2.87509806 | 0.30569008  |
| H | -5.39339684 | -3.33992595 | 1.29039910  |
| H | -5.65044833 | -1.79688305 | 0.49335710  |
| C | -6.83934627 | -3.41072494 | -0.31469072 |
| H | -6.73202981 | -4.48790264 | -0.50070968 |
| C | -8.07357673 | -3.16338265 | 0.55770803  |
| H | -8.98121340 | -3.55738319 | 0.08922029  |
| H | -7.96921652 | -3.64449496 | 1.53681115  |
| H | -8.22778402 | -2.09239193 | 0.73211615  |

Point Group= C2. State= 1-A.

HF= -2006.8551078. RMSD=5.985e-09. RMSF=2.264e-06.

Zero-point correction= 0.994051 (Hartree/Particle)

Sum of electronic and zero-point Energies= -2005.861057

Calculated IR spectrum (unscaled Harmonic frequencies (cm-1)):

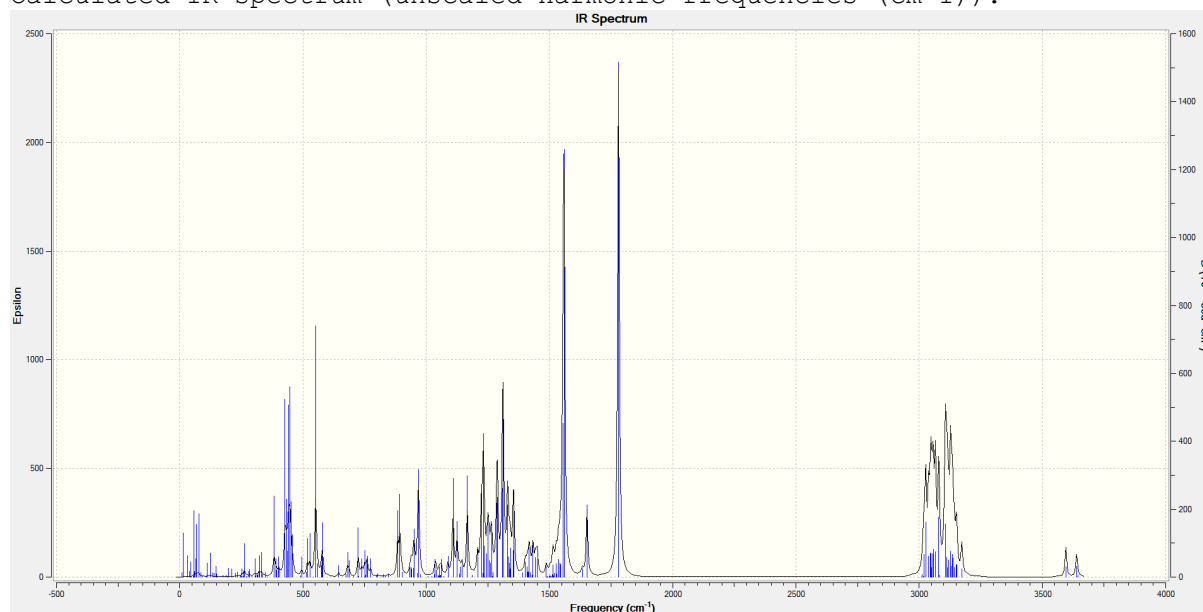

**1,3,5,7-Tetra-*tert*-butyl-2,6,9-trioxabi-cyclo[3.3.1]nona-3,7-diene-4,8-diyl-bis(3-hexylurea),  
Compound 4c.**

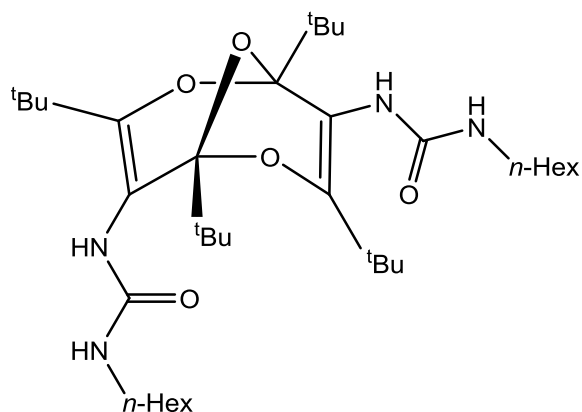

| Atom<br>Type | Coordinates (Angstroms) |             |             |
|--------------|-------------------------|-------------|-------------|
|              | X                       | Y           | Z           |
| C            | -1.16920275             | 2.25371276  | -0.00079002 |
| O            | -1.27016559             | 1.61171399  | 1.28690487  |
| C            | -0.14369488             | 0.99225164  | 1.73040257  |
| C            | 1.04925579              | 1.21149216  | 1.12071180  |
| C            | 1.17011171              | 2.25341685  | 0.00414783  |
| O            | 1.27091068              | 1.61302454  | -1.28435934 |
| C            | 0.14428252              | 0.99440905  | -1.72864121 |
| C            | -1.04861700             | 1.21318594  | -1.11867864 |
| O            | 0.00055323              | 3.04655386  | 0.00217733  |
| C            | -2.36783603             | 3.26563557  | -0.07719180 |
| C            | -3.72076547             | 2.60616719  | 0.26537762  |
| H            | -3.68262805             | 2.12002891  | 1.24230997  |
| H            | -4.49168687             | 3.38350501  | 0.30328085  |
| H            | -4.04174885             | 1.86286119  | -0.46465034 |
| C            | -2.41590912             | 3.90117029  | -1.47993410 |
| H            | -1.44970427             | 4.33681705  | -1.74658029 |
| H            | -2.68387829             | 3.18142028  | -2.26032279 |
| H            | -3.16805176             | 4.69670166  | -1.50039402 |
| C            | -2.13249173             | 4.38641669  | 0.96325890  |
| H            | -2.02220366             | 3.96953692  | 1.96746975  |
| H            | -1.24091932             | 4.97267290  | 0.73547820  |
| H            | -2.99442170             | 5.06179901  | 0.96730952  |
| C            | -0.42528856             | 0.10453656  | 2.95819859  |
| C            | 0.39851109              | 0.59850652  | 4.16914839  |
| H            | 0.14187710              | 0.00695593  | 5.05489391  |
| H            | 1.47295803              | 0.49419384  | 4.00259907  |
| H            | 0.18333173              | 1.64869742  | 4.39440897  |
| C            | -0.08897413             | -1.37228854 | 2.64356137  |
| H            | -0.61989741             | -1.69877583 | 1.74762068  |
| H            | 0.97922668              | -1.52606950 | 2.49150020  |
| H            | -0.40382779             | -1.99838175 | 3.48678096  |
| C            | -1.92226283             | 0.17019889  | 3.33497218  |
| H            | -2.54510240             | -0.19692649 | 2.51750818  |
| H            | -2.08912553             | -0.46306883 | 4.21275305  |
| H            | -2.23820809             | 1.18657856  | 3.58645843  |
| C            | 2.36897683              | 3.26497494  | 0.08181619  |
| C            | 3.72179499              | 2.60561436  | -0.26140620 |
| H            | 3.68361950              | 2.12057073  | -1.23888082 |
| H            | 4.49287223              | 3.38284182  | -0.29840006 |
| H            | 4.04258883              | 1.86143492  | 0.46781272  |

|   |             |             |             |
|---|-------------|-------------|-------------|
| C | 2.41707269  | 3.89892049  | 1.48527785  |
| H | 2.68486718  | 3.17825097  | 2.26487561  |
| H | 3.16935177  | 4.69429814  | 1.50668009  |
| H | 1.45092655  | 4.33443583  | 1.75235245  |
| C | 2.13396208  | 4.38699111  | -0.95737320 |
| H | 2.02365324  | 3.97127648  | -1.96206507 |
| H | 1.24250389  | 4.97318699  | -0.72898995 |
| H | 2.99604428  | 5.06218370  | -0.96059315 |
| C | 0.42566937  | 0.10821472  | -2.95758332 |
| C | -0.39784540 | 0.60408309  | -4.16795446 |
| H | -0.14132508 | 0.01363510  | -5.05446898 |
| H | -1.47234454 | 0.49991268  | -4.00165554 |
| H | -0.18228837 | 1.65450237  | -4.39178387 |
| C | 1.92270003  | 0.17386805  | -3.33412733 |
| H | 2.08942134  | -0.45824285 | -4.21276791 |
| H | 2.23902606  | 1.19048342  | -3.58417707 |
| H | 2.54533233  | -0.19460557 | -2.51711127 |
| C | 0.08882315  | -1.36891247 | -2.64494216 |
| H | 0.40359250  | -1.99399469 | -3.48894191 |
| H | 0.61951234  | -1.69676280 | -1.74935948 |
| H | -0.97945133 | -1.52253770 | -2.49324118 |
| N | 2.22023388  | 0.52795063  | 1.55776182  |
| H | 2.82855511  | 1.02891513  | 2.19175757  |
| C | 2.78973560  | -0.54450848 | 0.88360270  |
| O | 2.26912546  | -1.10603426 | -0.07200882 |
| N | 4.01759611  | -0.91862853 | 1.40120292  |
| H | 4.26452322  | -0.57879470 | 2.31980660  |
| C | 4.69749137  | -2.12372051 | 0.94534758  |
| H | 4.59792714  | -2.92473196 | 1.69327579  |
| H | 4.16536157  | -2.45288527 | 0.05012250  |
| C | 6.17850364  | -1.87714986 | 0.64076863  |
| H | 6.67080448  | -1.45680311 | 1.53003256  |
| H | 6.25427440  | -1.11308667 | -0.14283985 |
| C | 6.91378760  | -3.15166882 | 0.21050538  |
| H | 6.41724508  | -3.57690497 | -0.67298426 |
| H | 6.82293336  | -3.90924544 | 1.00217020  |
| C | 8.39752706  | -2.92334300 | -0.10244581 |
| H | 8.48903775  | -2.17754157 | -0.90477900 |
| H | 8.89076208  | -2.48333576 | 0.77639257  |
| C | 9.14181090  | -4.20004643 | -0.51158924 |
| H | 8.64838568  | -4.64132091 | -1.38819515 |
| H | 9.05181013  | -4.94362724 | 0.29202479  |
| C | 10.62225575 | -3.96333554 | -0.82445241 |
| H | 11.12487815 | -4.89300619 | -1.11030130 |
| H | 10.74467137 | -3.25251354 | -1.64957526 |
| H | 11.15056613 | -3.55353437 | 0.04400981  |
| N | -2.21980277 | 0.53059544  | -1.55665867 |
| H | -2.82794126 | 1.03259967  | -2.19000795 |
| C | -2.78970170 | -0.54253087 | -0.88389798 |
| O | -2.26931429 | -1.10547583 | 0.07099821  |
| N | -4.01769643 | -0.91552873 | -1.40198985 |
| H | -4.26449178 | -0.57441642 | -2.32015516 |
| C | -4.69802573 | -2.12097105 | -0.94770864 |
| H | -4.59866907 | -2.92107639 | -1.69663426 |
| H | -4.16607583 | -2.45143750 | -0.05285661 |
| C | -6.17897818 | -1.87428711 | -0.64293370 |
| H | -6.67107285 | -1.45266614 | -1.53170852 |
| H | -6.25455292 | -1.11117756 | 0.14162244  |
| C | -6.91472087 | -3.14909570 | -0.21431575 |
| H | -6.82407559 | -3.90570912 | -1.00692483 |
| H | -6.41837659 | -3.57560849 | 0.66866984  |

|   |              |             |             |
|---|--------------|-------------|-------------|
| H | -9.05335266  | -4.94022070 | -0.29821538 |
| C | -8.39840138  | -2.92065817 | 0.09883357  |
| H | -8.48970575  | -2.17583462 | 0.90209803  |
| H | -8.89143411  | -2.47937865 | -0.77948023 |
| C | -9.14314462  | -4.19762094 | 0.50632852  |
| H | -8.64991980  | -4.64016672 | 1.38240626  |
| C | -10.62352604 | -3.96079769 | 0.81940680  |
| H | -11.12648196 | -4.89065517 | 1.10405884  |
| H | -10.74574483 | -3.25097172 | 1.64541583  |
| H | -11.15164795 | -3.54972452 | -0.04856874 |

Point Group= C1. State= 1-A.

HF= -2006.8524225. RMSD=4.019e-09. RMSF=2.594e-06

Zero-point correction= 0.9938408 (Hartree/Particle)

Sum of electronic and zero-point Energies= -2005.858582

Calculated IR spectrum (unscaled Harmonic frequencies (cm<sup>-1</sup>)):

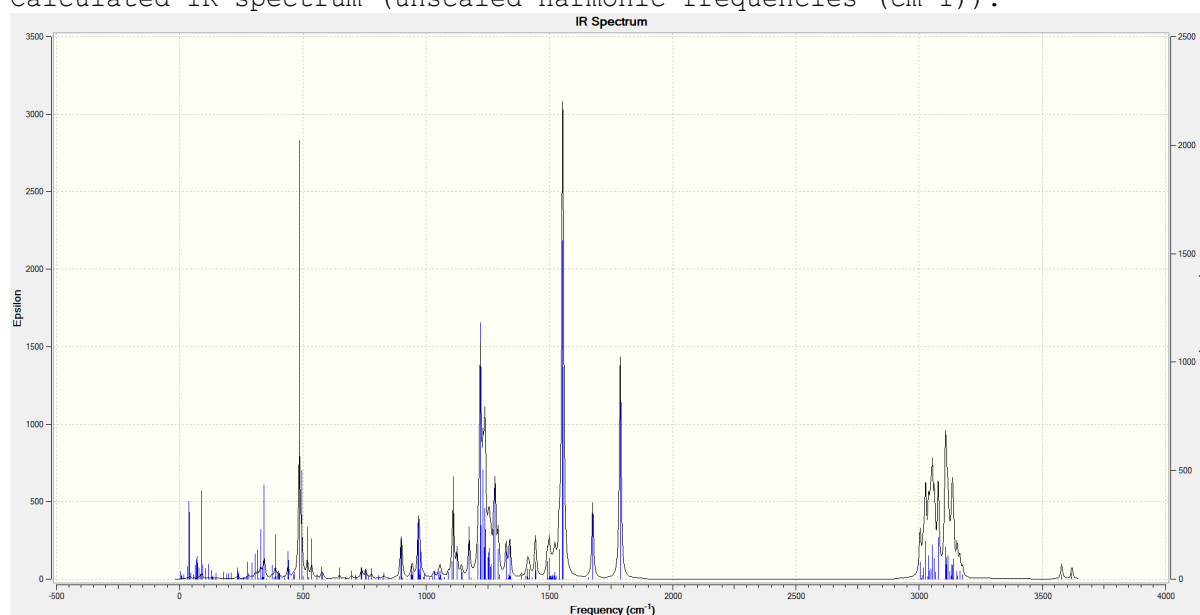

**Dimethyl (1,3,5,7-tetra-*tert*-butyl-2,6,9-trioxabi-cyclo[3.3.1]nona-3,7-diene-4,8-diyl)-biscarbamate, Compound 5.**

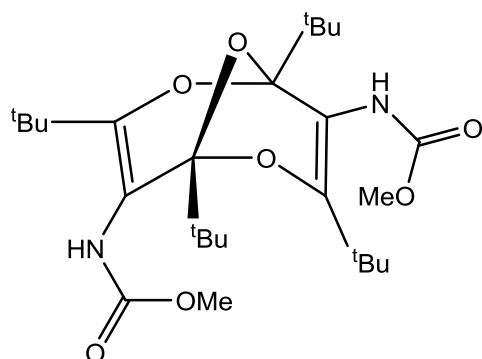

| Atom |  | Coordinates (Angstroms) |             |            |
|------|--|-------------------------|-------------|------------|
| Type |  | X                       | Y           | Z          |
| C    |  | 1.16827604              | 0.08004084  | 1.25124098 |
| C    |  | -1.16827604             | -0.08004084 | 1.25124098 |

|   |             |             |             |
|---|-------------|-------------|-------------|
| O | 1.17719818  | 1.36952546  | 0.59523748  |
| O | -1.17719818 | -1.36952546 | 0.59523748  |
| C | 0.00965091  | 1.75687927  | 0.01774251  |
| C | -0.00965091 | -1.75687927 | 0.01774251  |
| C | -1.13312695 | 1.05425809  | 0.22361702  |
| C | 1.13312695  | -1.05425809 | 0.22361702  |
| O | 0.00000000  | 0.00000000  | 2.03924809  |
| C | 2.36937415  | 0.10049034  | 2.26405631  |
| C | -2.36937415 | -0.10049034 | 2.26405631  |
| C | 2.51752238  | -1.28906259 | 2.91359531  |
| C | -2.51752238 | 1.28906259  | 2.91359531  |
| H | 3.26860048  | -1.24518869 | 3.70867312  |
| H | -3.26860048 | 1.24518869  | 3.70867312  |
| H | 1.57347665  | -1.62029846 | 3.35364177  |
| H | -1.57347665 | 1.62029846  | 3.35364177  |
| H | 2.84457503  | -2.05485887 | 2.20361669  |
| H | -2.84457503 | 2.05485887  | 2.20361669  |
| C | 3.69580479  | 0.53341494  | 1.60192743  |
| C | -3.69580479 | -0.53341494 | 1.60192743  |
| H | 4.06384685  | -0.16511232 | 0.85051557  |
| H | -4.06384685 | 0.16511232  | 0.85051557  |
| H | 3.59650781  | 1.51405630  | 1.13124739  |
| H | -3.59650781 | -1.51405630 | 1.13124739  |
| H | 4.46405946  | 0.61233275  | 2.37841195  |
| H | -4.46405946 | -0.61233275 | 2.37841195  |
| C | 2.05693798  | 1.13142189  | 3.37471421  |
| C | -2.05693798 | -1.13142189 | 3.37471421  |
| H | 1.87638016  | 2.12263037  | 2.95102312  |
| H | -1.87638016 | -2.12263037 | 2.95102312  |
| H | 1.18381064  | 0.84563888  | 3.96354587  |
| H | -1.18381064 | -0.84563888 | 3.96354587  |
| H | 2.91595705  | 1.20245328  | 4.04946720  |
| H | -2.91595705 | -1.20245328 | 4.04946720  |
| C | 0.18020549  | 3.05844459  | -0.79124417 |
| C | -0.18020549 | -3.05844459 | -0.79124417 |
| C | 1.66642112  | 3.47836108  | -0.81973927 |
| C | -1.66642112 | -3.47836108 | -0.81973927 |
| H | 2.28981779  | 2.70995119  | -1.28193971 |
| H | -2.28981779 | -2.70995119 | -1.28193971 |
| H | 1.76150592  | 4.40011941  | -1.40226517 |
| H | -1.76150592 | -4.40011941 | -1.40226517 |
| H | 2.05646789  | 3.66855099  | 0.18278701  |
| H | -2.05646789 | -3.66855099 | 0.18278701  |
| C | -0.29140481 | 2.87712446  | -2.25376964 |
| C | 0.29140481  | -2.87712446 | -2.25376964 |
| H | -1.37790079 | 2.84466405  | -2.33325934 |
| H | 1.37790079  | -2.84466405 | -2.33325934 |
| H | 0.06032185  | 3.72286912  | -2.85463293 |
| H | -0.06032185 | -3.72286912 | -2.85463293 |
| H | 0.10977451  | 1.95555063  | -2.68216225 |
| H | -0.10977451 | -1.95555063 | -2.68216225 |
| C | -0.62810853 | 4.19059375  | -0.11642391 |
| H | -0.30195700 | 4.34680888  | 0.91695195  |
| H | -0.47852270 | 5.12908350  | -0.66136666 |
| H | -1.69947367 | 3.97773877  | -0.11236241 |
| N | -2.34548813 | 1.43769117  | -0.41655839 |
| N | 2.34548813  | -1.43769117 | -0.41655839 |
| H | -2.99735732 | 2.02415323  | 0.08719403  |
| H | 2.99735732  | -2.02415323 | 0.08719403  |
| C | -2.94659442 | 0.88784871  | -1.52220082 |
| C | 2.94659442  | -0.88784871 | -1.52220082 |

|   |             |             |             |
|---|-------------|-------------|-------------|
| O | -4.08176621 | 1.17075815  | -1.86505381 |
| O | 4.08176621  | -1.17075815 | -1.86505381 |
| O | -2.13943793 | 0.03684046  | -2.19858965 |
| O | 2.13943793  | -0.03684046 | -2.19858965 |
| C | 0.62810853  | -4.19059375 | -0.11642391 |
| H | 0.47852270  | -5.12908350 | -0.66136666 |
| H | 1.69947367  | -3.97773877 | -0.11236241 |
| H | 0.30195700  | -4.34680888 | 0.91695195  |
| C | 2.72681903  | 0.48080045  | -3.40385329 |
| H | 1.97294608  | 1.13647383  | -3.83819347 |
| H | 3.63831855  | 1.04037004  | -3.18217171 |
| H | 2.97157922  | -0.33083707 | -4.09290537 |
| C | -2.72681903 | -0.48080045 | -3.40385329 |
| H | -1.97294608 | -1.13647383 | -3.83819347 |
| H | -3.63831855 | -1.04037004 | -3.18217171 |
| H | -2.97157922 | 0.33083707  | -4.09290537 |

Point Group= C2. State= 1-A.

HF=-1653.4059296. RMSD= 5.631e-09. RMSF= 6.935e-06.

Zero-point correction= 0.685364 (Hartree/Particle)

Sum of electronic and zero-point Energies= -1652.720565

Calculated IR spectrum (unscaled Harmonic frequencies (cm<sup>-1</sup>)):

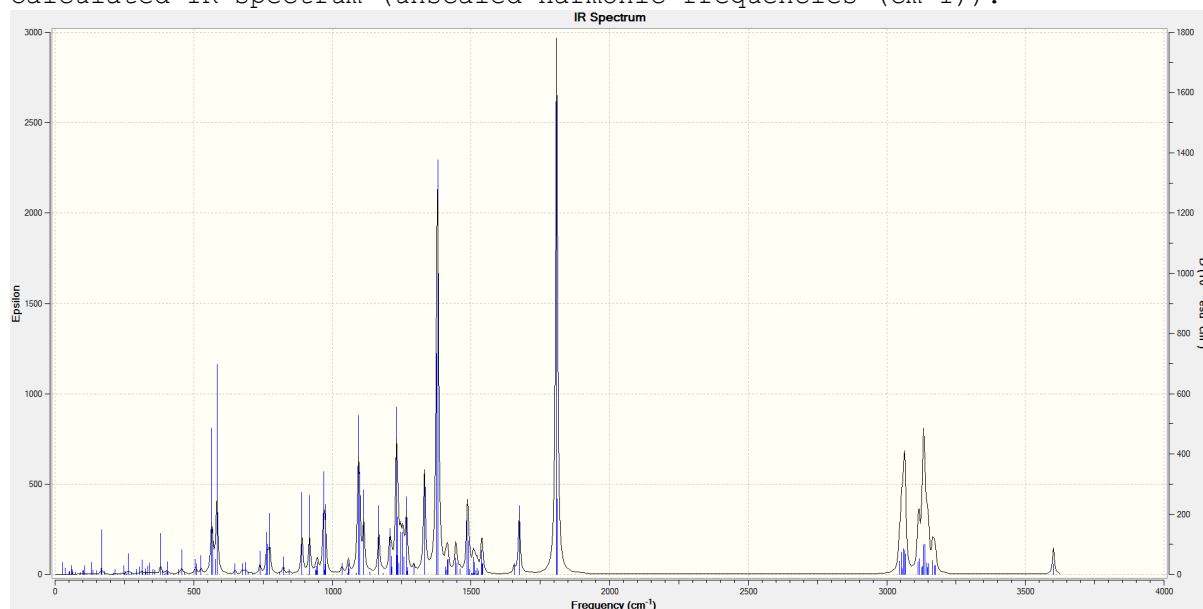

**(1,3,5,7-Tetra-tert-butyl-2,6,9-trioxabicyclo[3.3.1]nona-3,7-diene)-4,8-dicarboxic acid-(benzo-15-crown-5)-4'-yl-amide, Compound 7a-a.**

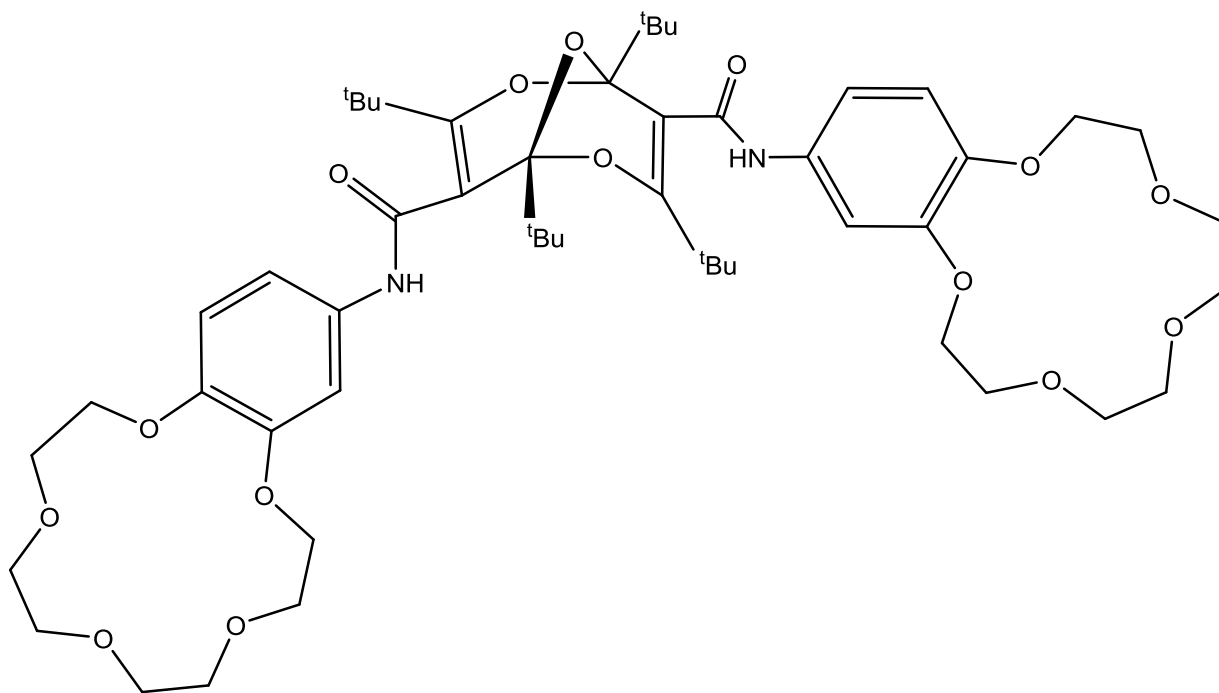

| Atom Type | Coordinates (Angstroms) |            |             |
|-----------|-------------------------|------------|-------------|
|           | X                       | Y          | Z           |
| O         | -0.00076800             | 4.53471900 | 0.00319600  |
| C         | 1.14999300              | 3.75349700 | 0.20635400  |
| C         | -1.15154400             | 3.75391900 | -0.20147100 |
| C         | 2.31278800              | 4.77313000 | 0.48102800  |
| C         | -2.31433700             | 4.77408000 | -0.47414600 |
| C         | -0.85741600             | 2.72004200 | -1.29704400 |
| C         | 0.85584400              | 2.71750100 | 1.29993800  |
| C         | -0.42124100             | 2.52700000 | 1.72103300  |
| C         | -0.92004400             | 1.74780200 | 2.95850200  |
| O         | -1.46824500             | 3.09180200 | 1.05158100  |
| C         | 0.41964300              | 2.53035000 | -1.71855100 |
| O         | 1.46668300              | 3.09381500 | -1.04800300 |
| C         | 0.91832900              | 1.75349400 | -2.95753900 |
| C         | 0.56169000              | 2.57239500 | -4.22389100 |
| C         | 2.45312500              | 1.58225400 | -2.91836000 |
| C         | 0.29191100              | 0.34251500 | -3.04832100 |
| C         | 2.29648700              | 5.84473100 | -0.63367700 |
| C         | 2.08016600              | 5.45192600 | 1.84582400  |
| C         | 3.70370800              | 4.10286600 | 0.46606000  |
| C         | -2.29802500             | 5.84348400 | 0.64266800  |
| C         | -2.08174300             | 5.45551700 | -1.83762900 |
| C         | -3.70525900             | 4.10379900 | -0.46048800 |
| C         | -0.29351300             | 0.33670800 | 3.04682300  |
| C         | -0.56373300             | 2.56442400 | 4.22640900  |
| C         | -2.45482000             | 1.57645800 | 2.91872400  |
| C         | -2.01520500             | 2.00483500 | -1.94637000 |
| C         | 2.01356300              | 2.00117600 | 1.94814500  |
| O         | -2.42125100             | 2.25331500 | -3.08268800 |
| O         | 2.41920000              | 2.24748800 | 3.08507900  |
| N         | 2.57506200              | 1.04540600 | 1.14254400  |
| N         | -2.57631000             | 1.04745000 | -1.14241900 |
| H         | 1.02930500              | 3.56196600 | -4.18724000 |
| H         | -0.51733800             | 2.69832900 | -4.31822200 |
| H         | 0.93933200              | 2.05553600 | -5.11328500 |
| H         | 2.97310000              | 2.54147700 | -2.89646700 |

|   |              |             |             |
|---|--------------|-------------|-------------|
| H | 2.78908800   | 1.00253700  | -2.05310000 |
| H | 2.76817400   | 1.04366400  | -3.81713100 |
| H | 0.76785300   | -0.20493700 | -3.86834200 |
| H | -0.77729400  | 0.36763500  | -3.25588700 |
| H | 0.45648100   | -0.23045700 | -2.12922700 |
| H | 1.36332700   | 6.41030700  | -0.64095100 |
| H | 2.43255400   | 5.39469900  | -1.62071700 |
| H | 3.11905300   | 6.54697700  | -0.46520600 |
| H | 1.10167100   | 5.93794700  | 1.88425200  |
| H | 2.14675200   | 4.73493400  | 2.66740500  |
| H | 2.84524100   | 6.21966100  | 2.00223200  |
| H | 3.87761100   | 3.46180600  | 1.33054400  |
| H | 4.46431100   | 4.88981400  | 0.49714800  |
| H | 3.86492800   | 3.52214500  | -0.44521100 |
| H | -1.36485500  | 6.40902800  | 0.65108700  |
| H | -2.43411600  | 5.39149400  | 1.62881000  |
| H | -3.12057400  | 6.54608700  | 0.47559700  |
| H | -1.10309600  | 5.94128900  | -1.87529600 |
| H | -2.14873600  | 4.74015900  | -2.66060400 |
| H | -2.84659200  | 6.22381600  | -1.99236400 |
| H | -3.87910600  | 3.46433800  | -1.32616600 |
| H | -4.46585100  | 4.89081500  | -0.49019700 |
| H | -3.86655400  | 3.52141300  | 0.44970500  |
| H | 0.77567500   | 0.36154600  | 3.25450200  |
| H | -0.45797300  | -0.23468300 | 2.12672300  |
| H | -0.76946500  | -0.21223400 | 3.86584200  |
| H | 0.51526500   | 2.69023400  | 4.32123200  |
| H | -1.03137800  | 3.55404100  | 4.19141300  |
| H | -0.94158500  | 2.04595800  | 5.11477600  |
| H | -2.76996300  | 1.03613300  | 3.81641900  |
| H | -2.79057700  | 0.99835300  | 2.05230700  |
| H | -2.97490700  | 2.53565900  | 2.89856300  |
| H | 2.16344900   | 0.96126100  | 0.22407000  |
| H | -2.16413800  | 0.96137000  | -0.22437900 |
| C | -3.68645900  | 0.20856300  | -1.39763700 |
| C | -4.04808100  | -0.70073300 | -0.38882600 |
| C | -4.42947400  | 0.24044000  | -2.58218000 |
| C | -5.11997500  | -1.56756300 | -0.55098500 |
| H | -3.49687600  | -0.75325600 | 0.54555700  |
| C | -5.50423700  | -0.63866900 | -2.74890700 |
| H | -4.16242100  | 0.93567300  | -3.36379400 |
| C | -5.85557600  | -1.55299200 | -1.75643000 |
| O | -5.40701200  | -2.46332800 | 0.44769700  |
| H | -6.05794700  | -0.60714100 | -3.68036200 |
| O | -6.85730900  | -2.47483200 | -1.85320200 |
| C | -6.63043700  | -2.22223300 | 1.17005200  |
| C | -7.81961400  | -2.33641700 | -2.88812400 |
| C | -6.72599200  | -3.30285400 | 2.24000200  |
| H | -7.49485900  | -2.26295500 | 0.50175300  |
| H | -6.58582100  | -1.23731500 | 1.65332500  |
| C | -8.90693800  | -3.35817400 | -2.62637000 |
| H | -8.24259700  | -1.32294900 | -2.88683700 |
| H | -7.36960900  | -2.52611000 | -3.87354000 |
| O | -7.68338500  | -2.90081100 | 3.21625100  |
| H | -5.74523300  | -3.41273300 | 2.72274800  |
| H | -6.99559600  | -4.26127500 | 1.78426400  |
| O | -9.56638700  | -3.01251100 | -1.42670000 |
| H | -8.45303300  | -4.35825400 | -2.54805700 |
| H | -9.60502600  | -3.36978500 | -3.48097900 |
| C | -8.74035600  | -3.79826100 | 3.49822800  |
| C | -10.45500000 | -4.00498100 | -0.95174900 |



|   |              |             |             |
|---|--------------|-------------|-------------|
| C | -9.98714600  | -3.53392800 | 2.66830800  |
| H | -8.42640700  | -4.84289700 | 3.36246600  |
| H | -8.99903900  | -3.66112600 | 4.55564000  |
| C | -10.84873300 | -3.66710700 | 0.47156700  |
| H | -9.97760900  | -4.99704000 | -0.96658700 |
| H | -11.36046200 | -4.05645000 | -1.58019100 |
| O | -9.74436600  | -3.90403600 | 1.32343200  |
| H | -10.82930800 | -4.11493500 | 3.08555600  |
| H | -10.24967800 | -2.46621800 | 2.73606300  |
| H | -11.16643300 | -2.61376600 | 0.52274200  |
| H | -11.70876300 | -4.29209800 | 0.76760000  |
| C | 3.68511200   | 0.20604700  | 1.39664900  |
| C | 4.04839200   | -0.70000900 | 0.38551400  |
| C | 4.42637100   | 0.23430200  | 2.58239200  |
| C | 5.12013000   | -1.56723700 | 0.54658100  |
| H | 3.49865000   | -0.74959400 | -0.54989100 |
| C | 5.50092700   | -0.64526700 | 2.74800900  |
| H | 4.15818700   | 0.92714800  | 3.36573800  |
| C | 5.85383200   | -1.55647300 | 1.75322300  |
| O | 5.40893200   | -2.45976000 | -0.45451400 |
| H | 6.05320100   | -0.61661400 | 3.68040800  |
| O | 6.85540200   | -2.47863200 | 1.84871200  |
| C | 6.63340100   | -2.21586900 | -1.17411000 |
| C | 7.81591300   | -2.34354200 | 2.88575400  |
| C | 6.73266400   | -3.29455500 | -2.24562700 |
| H | 7.49659200   | -2.25666000 | -0.50422300 |
| H | 6.58846500   | -1.23016400 | -1.65575000 |
| C | 8.90342900   | -3.36482300 | 2.62298600  |
| H | 8.23915600   | -1.33018600 | 2.88821400  |
| H | 7.36409100   | -2.53603000 | 3.86979300  |
| O | 7.69177300   | -2.88919600 | -3.21884100 |
| H | 5.75310500   | -3.40514100 | -2.73068400 |
| H | 7.00280200   | -4.25325400 | -1.79082800 |
| O | 9.56529800   | -3.01579100 | 1.42563400  |
| H | 8.44937100   | -4.36452500 | 2.54080000  |
| H | 9.59986400   | -3.37921100 | 3.47890200  |
| C | 8.74853600   | -3.78632300 | -3.50265800 |
| C | 10.45487000  | -4.00695200 | 0.94973800  |
| C | 9.99416200   | -3.52560400 | -2.66986400 |
| H | 8.43374500   | -4.83124400 | -3.37116200 |
| H | 9.00887100   | -3.64553300 | -4.55918400 |
| C | 10.85146600  | -3.66516700 | -0.47184800 |
| H | 9.97746400   | -4.99905200 | 0.96089500  |
| H | 11.35907100  | -4.06014000 | 1.57985300  |
| O | 9.74879400   | -3.89968700 | -1.32655300 |
| H | 10.83662400  | -4.10590700 | -3.08748500 |
| H | 10.25757700  | -2.45787900 | -2.73380300 |
| H | 11.16928500  | -2.61169400 | -0.51949000 |
| H | 11.71208000  | -4.28936300 | -0.76786900 |

Point Group= C1. State= 1-A.

HF= -3265.1536909. RMSD=2.004e-09. RMSF=1.306e-06.

Zero-point correction= 1.2422628 (Hartree/Particle)

Sum of electronic and zero-point Energies= -3263.911428

Calculated IR spectrum (unscaled Harmonic frequencies (cm-1)):

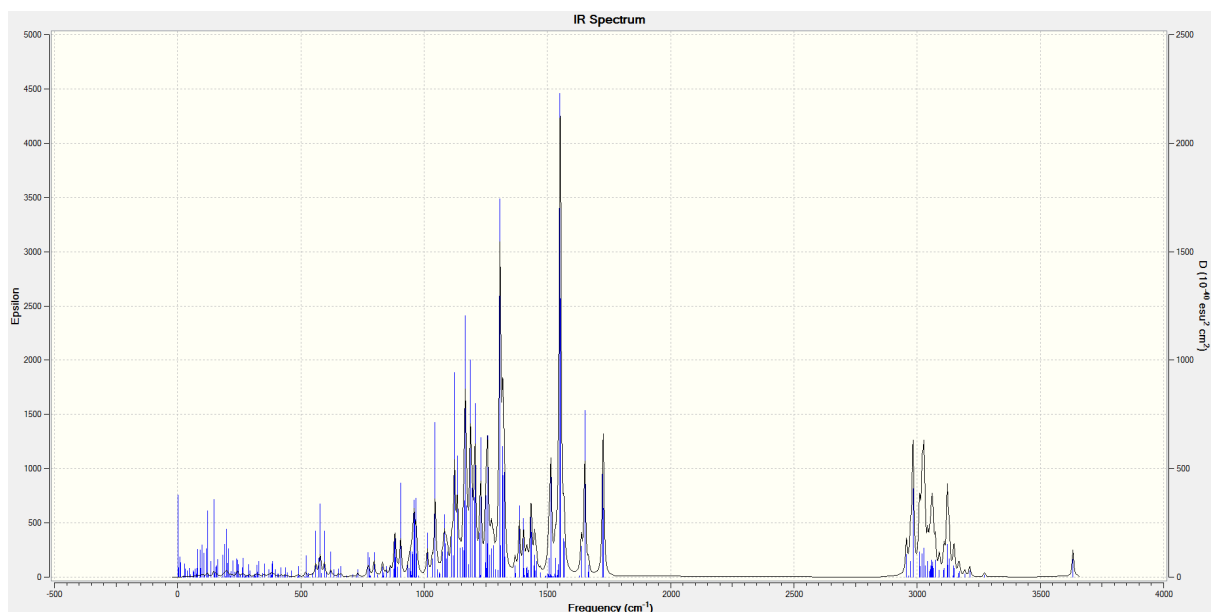

**(1,3,5,7-Tetra-tert-butyl-2,6,9-trioxabicyclo[3.3.1]nona-3,7-diene)-4,8-dicarboxic acid-(benzo-15-crown-5)-4'-yl-amide, Compound 7a-b.**

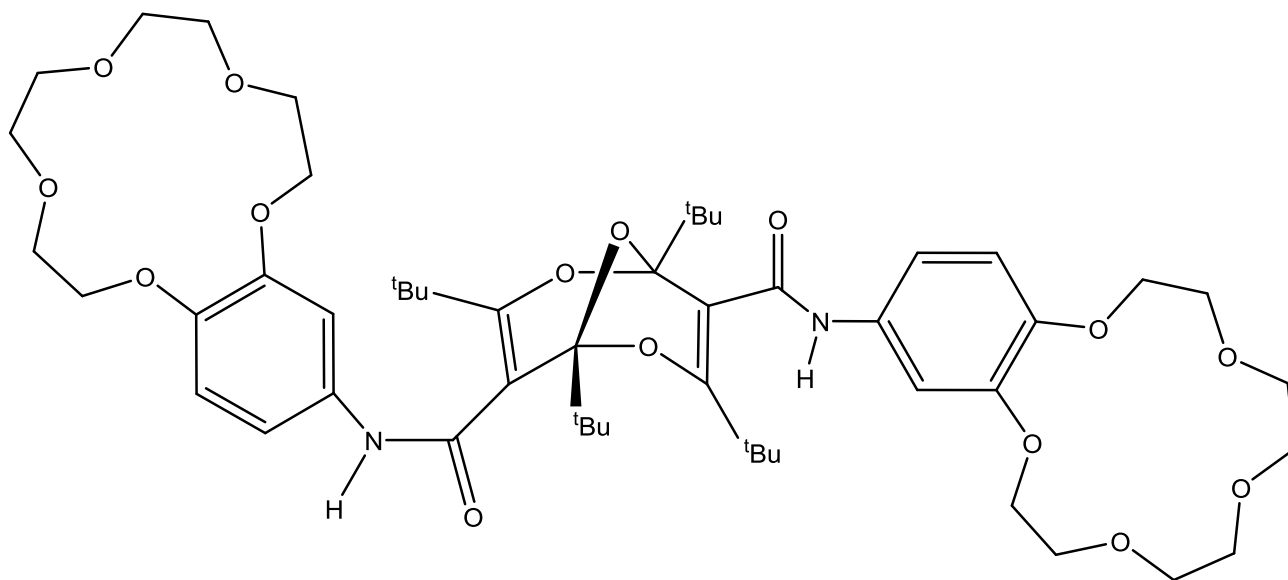

| Atom Type | Coordinates (Angstroms) |            |             |
|-----------|-------------------------|------------|-------------|
|           | X                       | Y          | Z           |
| O         | 0.90307800              | 2.50710400 | 1.47199100  |
| C         | -0.39989000             | 1.97267400 | 1.48812100  |
| C         | 1.48377000              | 2.51985400 | 0.19248500  |
| C         | -0.87050200             | 2.06990500 | 2.98277100  |
| C         | 2.87761000              | 3.22636500 | 0.37949100  |
| C         | 1.40522100              | 1.08411200 | -0.39868900 |
| C         | -1.24325400             | 2.68254800 | 0.41835100  |
| C         | -0.62107400             | 3.38849000 | -0.55989900 |
| C         | -1.23654900             | 4.30901700 | -1.63489900 |
| O         | 0.73473200              | 3.40765700 | -0.65530300 |
| C         | 0.50607100              | 0.20921100 | 0.12405700  |

|   |             |             |             |
|---|-------------|-------------|-------------|
| O | -0.29464200 | 0.55613700  | 1.18212400  |
| C | 0.15213000  | -1.24184200 | -0.27064400 |
| C | 0.89583800  | -1.80697400 | -1.49290500 |
| C | 0.42919000  | -2.16178100 | 0.94535100  |
| C | -1.36143400 | -1.29830200 | -0.59268400 |
| C | 0.20784600  | 1.41965000  | 3.88044000  |
| C | -1.02477300 | 3.55391400  | 3.37349000  |
| C | -2.19857200 | 1.32399900  | 3.23600300  |
| C | 2.62831400  | 4.61934300  | 1.00776300  |
| C | 3.77049700  | 2.42176300  | 1.33968500  |
| C | 3.60377900  | 3.44432500  | -0.96336500 |
| C | -2.51503800 | 3.71421100  | -2.26695600 |
| C | -1.56680300 | 5.66889900  | -0.97130900 |
| C | -0.22169000 | 4.53558200  | -2.77961200 |
| C | 2.01526400  | 0.88990400  | -1.76478400 |
| C | -2.74747400 | 2.69862100  | 0.53991700  |
| O | 1.44420700  | 1.35756200  | -2.74785600 |
| O | -3.37161700 | 3.66482000  | 0.98128200  |
| N | -3.35615400 | 1.54389300  | 0.12474300  |
| N | 3.22528000  | 0.25527600  | -1.97496600 |
| H | 1.96972200  | -1.89208300 | -1.32815300 |
| H | 0.71584900  | -1.21538500 | -2.39337900 |
| H | 0.51873200  | -2.81727400 | -1.68175900 |
| H | 1.49842300  | -2.21203700 | 1.17076100  |
| H | -0.09701900 | -1.81488700 | 1.83671600  |
| H | 0.09063500  | -3.17839100 | 0.71906000  |
| H | -1.63639100 | -2.31398400 | -0.89394100 |
| H | -1.60491200 | -0.63097200 | -1.42789800 |
| H | -1.96404300 | -1.03479100 | 0.27845400  |
| H | 1.16953400  | 1.92747000  | 3.79150100  |
| H | 0.35147600  | 0.36458900  | 3.63239400  |
| H | -0.11429000 | 1.48146700  | 4.92486800  |
| H | -0.08503800 | 4.09593600  | 3.23941100  |
| H | -1.80003800 | 4.04741500  | 2.78378200  |
| H | -1.30446400 | 3.62082900  | 4.43035900  |
| H | -3.06188600 | 1.83308000  | 2.80785600  |
| H | -2.36406100 | 1.27261800  | 4.31720300  |
| H | -2.16599800 | 0.29944400  | 2.85714800  |
| H | 2.13216300  | 4.54444500  | 1.97689700  |
| H | 2.01982900  | 5.24981100  | 0.35622900  |
| H | 3.59255000  | 5.11551600  | 1.15777800  |
| H | 3.28421500  | 2.27813300  | 2.30793000  |
| H | 4.03707700  | 1.44355600  | 0.93863100  |
| H | 4.70264300  | 2.97104700  | 1.50890000  |
| H | 3.99584200  | 2.51789700  | -1.38338400 |
| H | 4.45762400  | 4.10919300  | -0.79658400 |
| H | 2.95028300  | 3.91247900  | -1.70253700 |
| H | -3.35702100 | 3.67537200  | -1.57648500 |
| H | -2.33282600 | 2.71084000  | -2.66422300 |
| H | -2.81836500 | 4.35106300  | -3.10429800 |
| H | -2.30896100 | 5.54921600  | -0.17949900 |
| H | -0.66669600 | 6.11912400  | -0.53968400 |
| H | -1.95943800 | 6.36090000  | -1.72494700 |
| H | -0.70119800 | 5.13384600  | -3.56111100 |
| H | 0.11194000  | 3.58897800  | -3.21166100 |
| H | 0.66197900  | 5.07710000  | -2.43625000 |
| H | -2.73538700 | 0.83786600  | -0.24164500 |
| H | 3.45166400  | 0.30775200  | -2.96168500 |
| C | 4.17387600  | -0.45027100 | -1.20132900 |
| C | 5.39170700  | -0.75483800 | -1.83633600 |
| C | 3.98548700  | -0.87905600 | 0.11486800  |

|   |              |             |             |
|---|--------------|-------------|-------------|
| C | 6.39042300   | -1.47021000 | -1.18988500 |
| H | 5.58393700   | -0.43230800 | -2.85550200 |
| C | 4.99129700   | -1.59577400 | 0.77380800  |
| H | 3.06830600   | -0.65149600 | 0.63776700  |
| C | 6.18955600   | -1.91299800 | 0.13674700  |
| O | 7.53327800   | -1.77638400 | -1.87967900 |
| H | 4.81250300   | -1.92027100 | 1.79247200  |
| O | 7.20032200   | -2.64912100 | 0.68155700  |
| C | 8.73544300   | -1.10648700 | -1.44643800 |
| C | 7.22302200   | -2.84905600 | 2.08814000  |
| C | 9.83331200   | -1.51987300 | -2.41999200 |
| H | 8.99408900   | -1.38771900 | -0.42241700 |
| H | 8.59267100   | -0.01962900 | -1.50490700 |
| C | 8.55583200   | -3.48396800 | 2.42765900  |
| H | 7.11427300   | -1.89072800 | 2.61307300  |
| H | 6.40898100   | -3.51712700 | 2.40507300  |
| O | 10.93132800  | -0.62073400 | -2.30116100 |
| H | 9.43700600   | -1.46130000 | -3.44254100 |
| H | 10.13853100  | -2.55455400 | -2.22918700 |
| O | 9.57880000   | -2.55264000 | 2.14639700  |
| H | 8.68448900   | -4.39895700 | 1.82883800  |
| H | 8.55649600   | -3.77420300 | 3.49231700  |
| C | 12.19168800  | -1.16601100 | -1.95924500 |
| C | 10.88395800  | -3.09509400 | 2.20760700  |
| C | 12.47750200  | -1.13086800 | -0.46593800 |
| H | 12.29387500  | -2.19739500 | -2.32528000 |
| H | 12.94886800  | -0.55410000 | -2.46530700 |
| C | 11.85308400  | -2.10558200 | 1.59427600  |
| H | 10.93893800  | -4.04378700 | 1.65175800  |
| H | 11.17771000  | -3.29680700 | 3.25169600  |
| O | 11.66369300  | -2.08439400 | 0.19245400  |
| H | 13.54690900  | -1.35180300 | -0.29826600 |
| H | 12.27930000  | -0.11796000 | -0.08111300 |
| H | 11.68273100  | -1.10836300 | 2.02968200  |
| H | 12.88472500  | -2.40880500 | 1.84224100  |
| C | -4.73395800  | 1.22829500  | 0.08775500  |
| C | -5.09265900  | -0.01055500 | -0.47290000 |
| C | -5.74030300  | 2.06796600  | 0.57518600  |
| C | -6.42048500  | -0.39984500 | -0.56295500 |
| H | -4.34038000  | -0.69075600 | -0.86014600 |
| C | -7.08034800  | 1.67623200  | 0.47950700  |
| H | -5.47779900  | 3.02017100  | 1.01130300  |
| C | -7.44120400  | 0.45971900  | -0.09864600 |
| O | -6.73624100  | -1.59207400 | -1.16563900 |
| H | -7.84057300  | 2.34923600  | 0.85837700  |
| O | -8.71927300  | 0.01126100  | -0.27911900 |
| C | -7.19038200  | -2.63658400 | -0.28780600 |
| C | -9.79251000  | 0.79721700  | 0.21811100  |
| C | -8.18262100  | -3.49045600 | -1.05986900 |
| H | -7.67128800  | -2.21789000 | 0.60064400  |
| H | -6.33420400  | -3.24704700 | 0.02926500  |
| C | -11.09083400 | 0.16169600  | -0.23552900 |
| H | -9.75422400  | 0.84924100  | 1.31494000  |
| H | -9.74424700  | 1.82058800  | -0.18040400 |
| O | -8.37385600  | -4.68071100 | -0.29784000 |
| H | -7.76895000  | -3.72920800 | -2.05253000 |
| H | -9.11875500  | -2.94063500 | -1.18737800 |
| O | -11.22114000 | -1.10961600 | 0.36274700  |
| H | -11.09109400 | 0.07768200  | -1.33369100 |
| H | -11.92379300 | 0.82760400  | 0.05054900  |
| C | -9.47109200  | -5.48139800 | -0.69883100 |

|   |              |             |             |
|---|--------------|-------------|-------------|
| C | -12.36835700 | -1.82199600 | -0.06108000 |
| C | -10.75921400 | -5.12153400 | 0.02849700  |
| H | -9.63051400  | -5.42528800 | -1.78571200 |
| H | -9.21460900  | -6.51861600 | -0.45016600 |
| C | -12.22036300 | -3.26954400 | 0.36337500  |
| H | -12.47352300 | -1.77856500 | -1.15625900 |
| H | -13.28378600 | -1.39564600 | 0.38348600  |
| O | -11.21622000 | -3.86393400 | -0.43404800 |
| H | -11.51697200 | -5.90612500 | -0.14739000 |
| H | -10.55712600 | -5.08478600 | 1.11024400  |
| H | -11.94861400 | -3.30918800 | 1.42959000  |
| H | -13.18552400 | -3.78999100 | 0.24083800  |

Point Group= C1. State= 1-A.

HF= -3265.1343346. RMSD=4.696e-09. RMSF=1.942e-06

Zero-point correction= 1.242410 (Hartree/Particle)

Sum of electronic and zero-point Energies= -3263.891924

Calculated IR spectrum (unscaled Harmonic frequencies (cm<sup>-1</sup>)):

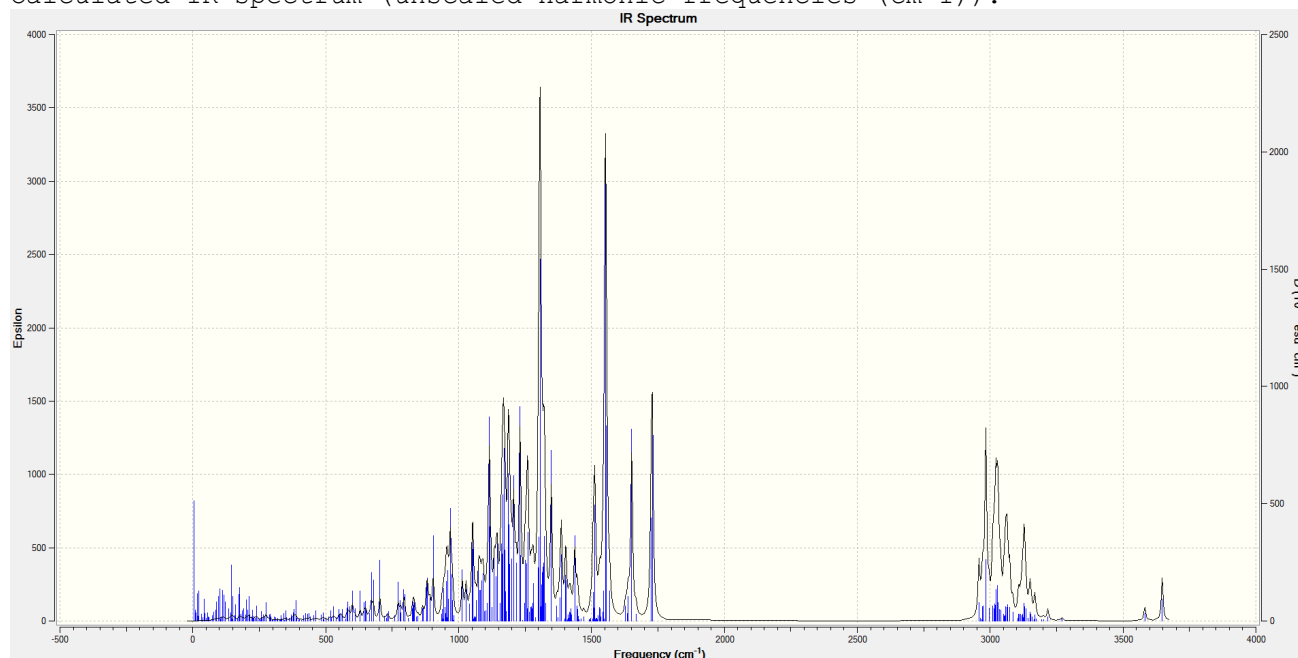

**(1,3,5,7-Tetra-tert-butyl-2,6,9-trioxabicyclo[3.3.1]nona-3,7-diene)-4,8-dicarboxic acid-(benzo-15-crown-5)-4'-yl-amide, Compound 7a-c.**

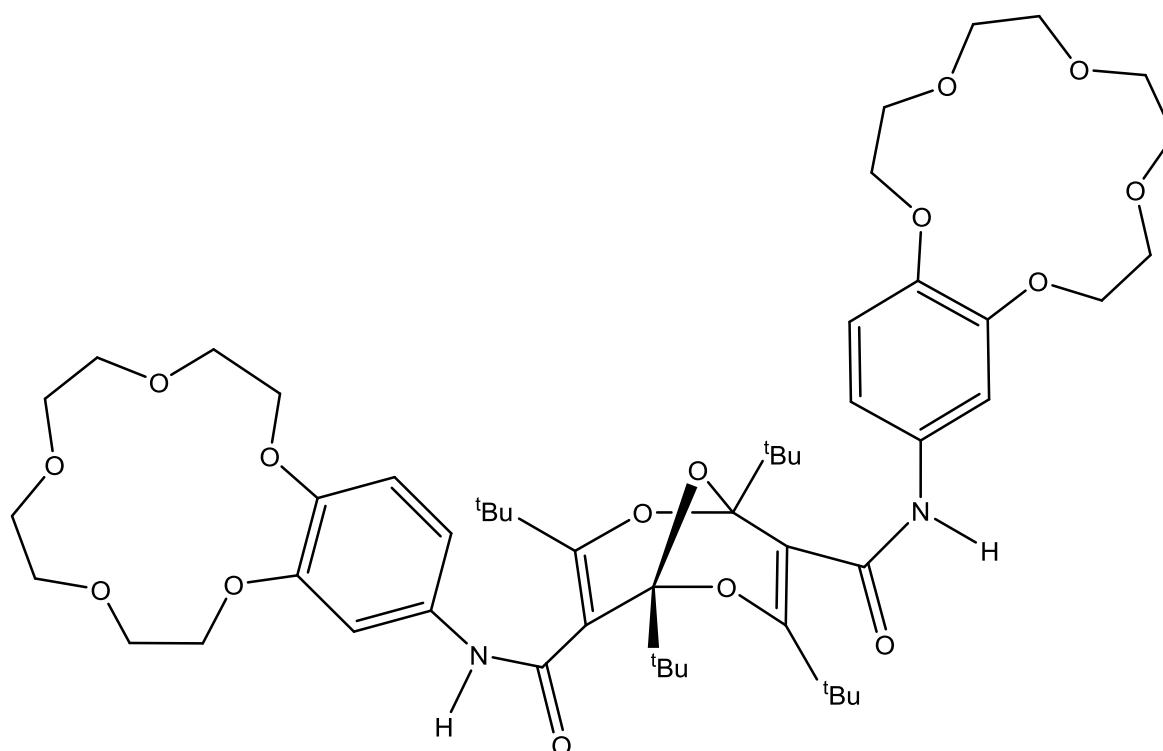

| Atom<br>Type | Coordinates (Angstroms) |             |             |
|--------------|-------------------------|-------------|-------------|
|              | X                       | Y           | Z           |
| O            | 0.00000000              | 0.00000000  | 0.13564930  |
| C            | 1.00921114              | 0.61413399  | 0.90479066  |
| C            | -1.00921114             | -0.61413399 | 0.90479066  |
| C            | 2.09097549              | 1.08427030  | -0.13658278 |
| C            | -2.09097549             | -1.08427030 | -0.13658278 |
| C            | -0.34196301             | -1.63483099 | 1.85953552  |
| C            | 0.34196301              | 1.63483099  | 1.85953552  |
| C            | -0.93054384             | 1.39246444  | 2.26321769  |
| C            | -1.78809047             | 2.03914436  | 3.36868371  |
| O            | -1.67016788             | 0.38410520  | 1.70756841  |
| C            | 0.93054384              | -1.39246444 | 2.26321769  |
| O            | 1.67016788              | -0.38410520 | 1.70756841  |
| C            | 1.78809047              | -2.03914436 | 3.36868371  |
| C            | 1.21070020              | -3.31189683 | 4.01192772  |
| C            | 3.18385083              | -2.38275130 | 2.79374992  |
| C            | 1.93812758              | -0.97325404 | 4.48611765  |
| C            | 2.55317208              | -0.15587245 | -0.93962300 |
| C            | 1.48364958              | 2.09907665  | -1.12106726 |
| C            | 3.33997701              | 1.69234512  | 0.53585962  |
| C            | -2.55317208             | 0.15587245  | -0.93962300 |
| C            | -1.48364958             | -2.09907665 | -1.12106726 |
| C            | -3.33997701             | -1.69234512 | 0.53585962  |
| C            | -1.93812758             | 0.97325404  | 4.48611765  |
| C            | -1.21070020             | 3.31189683  | 4.01192772  |
| C            | -3.18385083             | 2.38275130  | 2.79374992  |
| C            | -1.24187305             | -2.62796618 | 2.53688479  |
| C            | 1.24187305              | 2.62796618  | 2.53688479  |
| O            | -2.04412211             | -2.27052411 | 3.39833241  |
| O            | 2.04412211              | 2.27052411  | 3.39833241  |
| N            | 1.26259650              | 3.96117021  | 2.16648199  |
| N            | -1.26259650             | -3.96117021 | 2.16648199  |
| H            | 1.13010196              | -4.14143060 | 3.30698931  |
| H            | 0.23873765              | -3.13639026 | 4.47723299  |

|   |             |             |             |
|---|-------------|-------------|-------------|
| H | 1.89606765  | -3.62562826 | 4.80597307  |
| H | 3.11128431  | -3.13005727 | 1.99637925  |
| H | 3.68664937  | -1.49940155 | 2.39829675  |
| H | 3.80641429  | -2.80405336 | 3.58948517  |
| H | 2.64271574  | -1.33872398 | 5.24149806  |
| H | 0.97581756  | -0.80308510 | 4.98015561  |
| H | 2.29246153  | -0.01665147 | 4.09994018  |
| H | 1.71635911  | -0.65487551 | -1.43154468 |
| H | 3.05957338  | -0.87990506 | -0.29733080 |
| H | 3.25995030  | 0.16511584  | -1.71162536 |
| H | 0.63636210  | 1.67149875  | -1.66316283 |
| H | 1.14795418  | 3.01053459  | -0.62462951 |
| H | 2.24292637  | 2.38620697  | -1.85627391 |
| H | 3.16269625  | 2.69683516  | 0.92081955  |
| H | 4.13414347  | 1.77066805  | -0.21397467 |
| H | 3.70378167  | 1.06961169  | 1.35495181  |
| H | -1.71635911 | 0.65487551  | -1.43154468 |
| H | -3.05957338 | 0.87990506  | -0.29733080 |
| H | -3.25995030 | -0.16511584 | -1.71162536 |
| H | -0.63636210 | -1.67149875 | -1.66316283 |
| H | -1.14795418 | -3.01053459 | -0.62462951 |
| H | -2.24292637 | -2.38620697 | -1.85627391 |
| H | -3.16269625 | -2.69683516 | 0.92081955  |
| H | -4.13414347 | -1.77066805 | -0.21397467 |
| H | -3.70378167 | -1.06961169 | 1.35495181  |
| H | -0.97581756 | 0.80308510  | 4.98015561  |
| H | -2.29246153 | 0.01665147  | 4.09994018  |
| H | -2.64271574 | 1.33872398  | 5.24149806  |
| H | -0.23873765 | 3.13639026  | 4.47723299  |
| H | -1.13010196 | 4.14143060  | 3.30698931  |
| H | -1.89606765 | 3.62562826  | 4.80597307  |
| H | -3.80641429 | 2.80405336  | 3.58948517  |
| H | -3.68664937 | 1.49940155  | 2.39829675  |
| H | -3.11128431 | 3.13005727  | 1.99637925  |
| H | 1.96647215  | 4.43951463  | 2.71740823  |
| H | -1.96647215 | -4.43951463 | 2.71740823  |
| C | 0.51891064  | 4.81690173  | 1.32107963  |
| C | 0.96480812  | 6.14952007  | 1.24974611  |
| C | -0.60045598 | 4.45096769  | 0.56724963  |
| C | 0.31728896  | 7.09471028  | 0.46617535  |
| H | 1.83699861  | 6.47516200  | 1.80932559  |
| C | -1.25633213 | 5.40061788  | -0.22446733 |
| H | -0.96609073 | 3.43502536  | 0.58394854  |
| C | -0.82408590 | 6.72448556  | -0.27824342 |
| O | 0.77522208  | 8.38624588  | 0.47765146  |
| H | -2.12750948 | 5.08849766  | -0.78879641 |
| O | -1.42954577 | 7.72421849  | -0.98286343 |
| C | 1.38499905  | 8.85276839  | -0.74304901 |
| C | -2.36252195 | 7.38005056  | -1.99700385 |
| C | 1.89810741  | 10.25930750 | -0.45721559 |
| H | 0.66425372  | 8.85905709  | -1.56505009 |
| H | 2.23280997  | 8.20525919  | -1.00232552 |
| C | -2.68797676 | 8.65062359  | -2.75505701 |
| H | -1.93256149 | 6.63190516  | -2.67632700 |
| H | -3.28501432 | 6.96828614  | -1.56216868 |
| O | 2.83480078  | 10.63149890 | -1.46371166 |
| H | 2.40549220  | 10.25802565 | 0.51685771  |
| H | 1.06092359  | 10.96394561 | -0.40695323 |
| O | -1.52200657 | 9.08496495  | -3.42268709 |
| H | -3.04000548 | 9.41578935  | -2.04586400 |
| H | -3.50692353 | 8.44725821  | -3.46620284 |

|   |             |              |             |
|---|-------------|--------------|-------------|
| C | 2.56526936  | 11.80499392  | -2.20676189 |
| C | -1.62948171 | 10.37860713  | -3.98467478 |
| C | 1.83360868  | 11.53281605  | -3.51192693 |
| H | 1.99333041  | 12.53221039  | -1.61338780 |
| H | 3.53508695  | 12.25817598  | -2.44787208 |
| C | -0.24945620 | 10.85027513  | -4.39454302 |
| H | -2.04984152 | 11.08793144  | -3.25506586 |
| H | -2.29061652 | 10.37038204  | -4.86794798 |
| O | 0.49936626  | 11.15016745  | -3.23241517 |
| H | 1.85371605  | 12.44534879  | -4.13455437 |
| H | 2.35874872  | 10.73773950  | -4.06472094 |
| H | 0.24412842  | 10.06557206  | -4.98931141 |
| H | -0.34853638 | 11.74408710  | -5.03418538 |
| C | -0.51891064 | -4.81690173  | 1.32107963  |
| C | -0.96480812 | -6.14952007  | 1.24974611  |
| C | 0.60045598  | -4.45096769  | 0.56724963  |
| C | -0.31728896 | -7.09471028  | 0.46617535  |
| H | -1.83699861 | -6.47516200  | 1.80932559  |
| C | 1.25633213  | -5.40061788  | -0.22446733 |
| H | 0.96609073  | -3.43502536  | 0.58394854  |
| C | 0.82408590  | -6.72448556  | -0.27824342 |
| O | -0.77522208 | -8.38624588  | 0.47765146  |
| H | 2.12750948  | -5.08849766  | -0.78879641 |
| O | 1.42954577  | -7.72421849  | -0.98286343 |
| C | -1.38499905 | -8.85276839  | -0.74304901 |
| C | 2.36252195  | -7.38005056  | -1.99700385 |
| C | -1.89810741 | -10.25930750 | -0.45721559 |
| H | -0.66425372 | -8.85905709  | -1.56505009 |
| H | -2.23280997 | -8.20525919  | -1.00232552 |
| C | 2.68797676  | -8.65062359  | -2.75505701 |
| H | 1.93256149  | -6.63190516  | -2.67632700 |
| H | 3.28501432  | -6.96828614  | -1.56216868 |
| O | -2.83480078 | -10.63149890 | -1.46371166 |
| H | -2.40549220 | -10.25802565 | 0.51685771  |
| H | -1.06092359 | -10.96394561 | -0.40695323 |
| O | 1.52200657  | -9.08496495  | -3.42268709 |
| H | 3.04000548  | -9.41578935  | -2.04586400 |
| H | 3.50692353  | -8.44725821  | -3.46620284 |
| C | -2.56526936 | -11.80499392 | -2.20676189 |
| C | 1.62948171  | -10.37860713 | -3.98467478 |
| C | -1.83360868 | -11.53281605 | -3.51192693 |
| H | -1.99333041 | -12.53221039 | -1.61338780 |
| H | -3.53508695 | -12.25817598 | -2.44787208 |
| C | 0.24945620  | -10.85027513 | -4.39454302 |
| H | 2.04984152  | -11.08793144 | -3.25506586 |
| H | 2.29061652  | -10.37038204 | -4.86794798 |
| O | -0.49936626 | -11.15016745 | -3.23241517 |
| H | -1.85371605 | -12.44534879 | -4.13455437 |
| H | -2.35874872 | -10.73773950 | -4.06472094 |
| H | -0.24412842 | -10.06557206 | -4.98931141 |
| H | 0.34853638  | -11.74408710 | -5.03418538 |

Point Group= C2. State= 1-A.

HF= -3265.1197003. RMSD=3.529e-09. RMSF=3.420e-06.

Zero-point correction= 1.241716 (Hartree/Particle)

Sum of electronic and zero-point Energies= -3263.877985

Calculated IR spectrum (unscaled Harmonic frequencies (cm-1)):



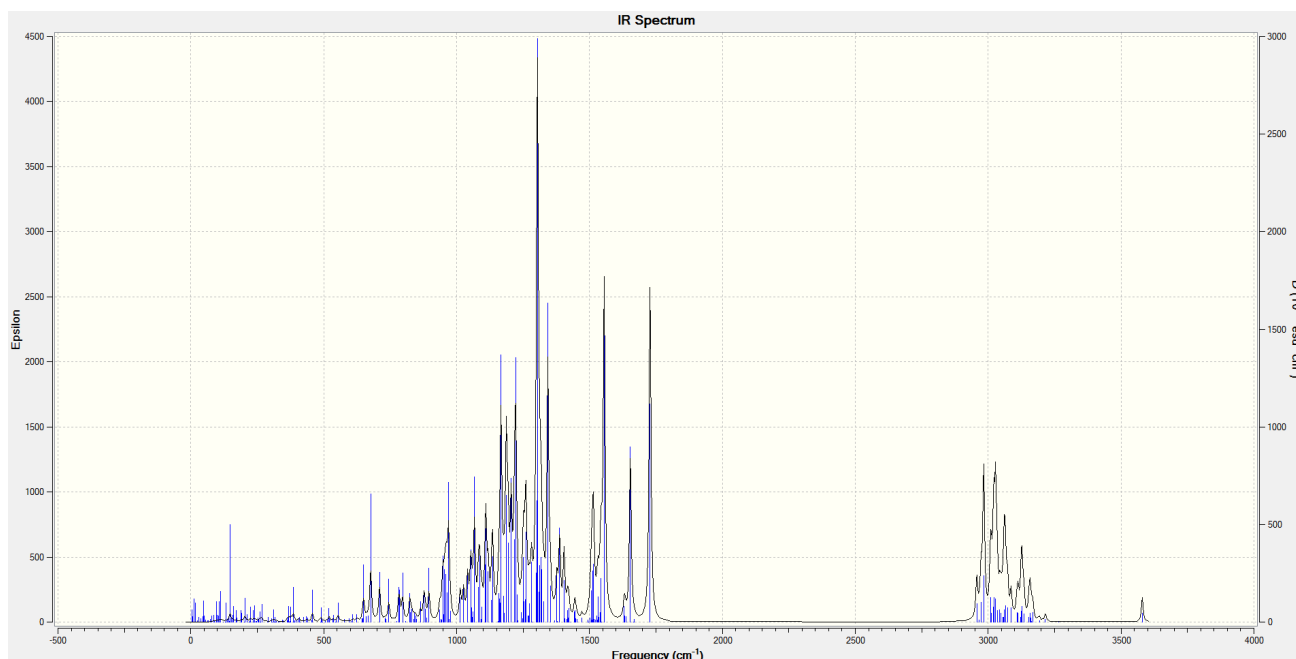

**(1,3,5,7-Tetra-tert-butyl-2,6,9-trioxabicyclo[3.3.1]nona-3,7-diene)-4,8-dicarboxylic acid-(dibenzo-18-crown-6)-4'-yl-amide, Compound 7b-a.**

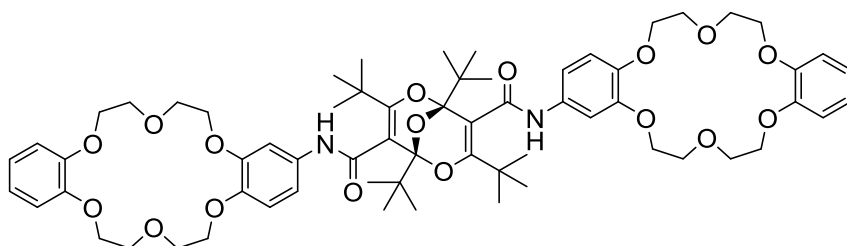

| Atom Type | Coordinates (Angstroms) |            |             |
|-----------|-------------------------|------------|-------------|
|           | X                       | Y          | Z           |
| O         | 0.00000038              | 6.56398544 | 0.00000002  |
| C         | -1.16581475             | 5.78203700 | -0.07366664 |
| C         | 1.16581541              | 5.78203687 | 0.07366669  |
| C         | -2.35401032             | 6.79710106 | -0.22601947 |
| C         | 2.35401109              | 6.79710078 | 0.22601951  |
| C         | 0.99151101              | 4.74057647 | 1.18854156  |
| C         | -0.99151048             | 4.74057659 | -1.18854152 |
| C         | 0.22879788              | 4.55740368 | -1.75528850 |
| C         | 0.58487471              | 3.78230389 | -3.04262851 |
| O         | 1.34250067              | 5.12909048 | -1.21121509 |
| C         | -0.22879737             | 4.55740370 | 1.75528854  |
| O         | -1.34250009             | 5.12909064 | 1.21121513  |
| C         | -0.58487429             | 3.78230396 | 3.04262855  |
| C         | -0.07137221             | 4.59322432 | 4.25888066  |
| C         | -2.11583939             | 3.62703636 | 3.18414425  |
| C         | 0.03220119              | 2.36405605 | 3.05826348  |
| C         | -2.21804402             | 7.87622953 | 0.87297117  |
| C         | -2.27344639             | 7.46697699 | -1.61243952 |
| C         | -3.73265878             | 6.12329987 | -0.05541542 |
| C         | 2.21804492              | 7.87622927 | -0.87297112 |
| C         | 2.27344725              | 7.46697672 | 1.61243956  |

|   |             |             |             |
|---|-------------|-------------|-------------|
| C | 3.73265948  | 6.12329943  | 0.05541547  |
| C | -0.03220093 | 2.36405605  | -3.05826344 |
| C | 0.07137273  | 4.59322431  | -4.25888061 |
| C | 2.11583979  | 3.62703611  | -3.18414420 |
| C | 2.20974088  | 4.00460965  | 1.68755886  |
| C | -2.20974043 | 4.00460991  | -1.68755882 |
| O | 2.75922433  | 4.24062261  | 2.76342320  |
| O | -2.75922386 | 4.24062294  | -2.76342316 |
| N | -2.64525717 | 3.04028842  | -0.81534064 |
| N | 2.64525751  | 3.04028811  | 0.81534068  |
| C | -3.75821338 | 2.17392719  | -0.92342848 |
| C | -3.89331742 | 1.19701011  | 0.07978130  |
| C | -4.69726990 | 2.24267593  | -1.95581328 |
| C | -4.95644557 | 0.29348417  | 0.06737551  |
| C | -5.76393399 | 1.34216213  | -1.95121957 |
| C | -5.91994696 | 0.37175718  | -0.96689918 |
| O | -5.13319815 | -0.68866284 | 1.00029636  |
| O | -6.95372615 | -0.51824298 | -1.10356143 |
| C | -4.18348357 | -0.81159486 | 2.05164530  |
| C | -7.87927265 | -0.64963836 | -0.01972975 |
| C | -4.64520395 | -1.88944965 | 3.01123202  |
| C | -9.00367917 | -1.56106126 | -0.46419656 |
| O | -4.52468868 | -3.15518139 | 2.40242857  |
| O | -8.48108177 | -2.85249657 | -0.69340014 |
| C | -4.89782892 | -4.21569083 | 3.26196385  |
| C | -9.46252618 | -3.85820839 | -0.79098058 |
| C | -4.82254606 | -5.52449218 | 2.50262206  |
| C | -8.78203480 | -5.17204873 | -1.11839923 |
| O | -5.94140957 | -5.59686549 | 1.63340018  |
| O | -7.92410340 | -5.50646040 | -0.03736759 |
| C | -5.99499326 | -6.61719331 | 0.72970893  |
| C | -7.06768869 | -6.55546657 | -0.19587129 |
| C | -5.08976139 | -7.67471618 | 0.66081786  |
| C | -7.18576723 | -7.53963263 | -1.17490471 |
| C | -5.22419562 | -8.66250622 | -0.32449318 |
| C | -6.26391589 | -8.59315394 | -1.24047248 |
| C | 3.75821361  | 2.17392675  | 0.92342852  |
| C | 3.89331754  | 1.19700966  | -0.07978126 |
| C | 4.69727014  | 2.24267538  | 1.95581332  |
| C | 4.95644558  | 0.29348358  | -0.06737547 |
| C | 5.76393413  | 1.34216145  | 1.95121961  |
| C | 5.91994698  | 0.37175648  | 0.96689922  |
| O | 5.13319805  | -0.68866345 | -1.00029632 |
| O | 6.95372607  | -0.51824379 | 1.10356148  |
| C | 4.18348345  | -0.81159535 | -2.05164526 |
| C | 7.87927255  | -0.64963929 | 0.01972979  |
| C | 4.64520371  | -1.88945020 | -3.01123198 |
| C | 9.00367897  | -1.56106232 | 0.46419660  |
| O | 4.52468829  | -3.15518193 | -2.40242853 |
| O | 8.48108142  | -2.85249757 | 0.69340018  |
| C | 4.89782840  | -4.21569141 | -3.26196381 |
| C | 9.46252570  | -3.85820951 | 0.79098062  |
| C | 4.82254538  | -5.52449275 | -2.50262201 |
| C | 8.78203417  | -5.17204977 | 1.11839927  |
| O | 5.94140888  | -5.59686619 | -1.63340013 |
| O | 7.92410273  | -5.50646133 | 0.03736763  |
| C | 5.99499246  | -6.61719401 | -0.72970888 |
| C | 7.06768789  | -6.55546741 | 0.19587134  |
| C | 5.08976046  | -7.67471678 | -0.66081782 |
| C | 7.18576632  | -7.53963348 | 1.17490475  |
| C | 5.22419457  | -8.66250684 | 0.32449322  |

|   |              |             |             |
|---|--------------|-------------|-------------|
| C | 6.26391486   | -8.59315468 | 1.24047252  |
| H | -0.52657560  | 5.58897039  | 4.27827565  |
| H | 1.01269499   | 4.70560938  | 4.22493793  |
| H | -0.34711155  | 4.07935240  | 5.18664198  |
| H | -2.62471690  | 4.59154810  | 3.22315848  |
| H | -2.55783338  | 3.05317872  | 2.36326609  |
| H | -2.32730133  | 3.09186188  | 4.11511452  |
| H | -0.35391233  | 1.81935527  | 3.92610566  |
| H | 1.11827732   | 2.37519016  | 3.14411697  |
| H | -0.24107576  | 1.79620339  | 2.16167673  |
| H | -1.29329605  | 8.44633607  | 0.77073849  |
| H | -2.23903550  | 7.43223964  | 1.87185062  |
| H | -3.05822369  | 8.57341588  | 0.79431784  |
| H | -1.29958658  | 7.93927623  | -1.76641809 |
| H | -2.44466588  | 6.74775178  | -2.41670651 |
| H | -3.04134827  | 8.24438558  | -1.68320616 |
| H | -3.99202531  | 5.46713279  | -0.88649650 |
| H | -4.49572164  | 6.90768797  | -0.02121792 |
| H | -3.79600797  | 5.55773075  | 0.87725174  |
| H | 1.29329702   | 8.44633592  | -0.77073845 |
| H | 2.23903635   | 7.43223937  | -1.87185058 |
| H | 3.05822467   | 8.57341552  | -0.79431780 |
| H | 1.29958750   | 7.93927608  | 1.76641813  |
| H | 2.44466665   | 6.74775150  | 2.41670655  |
| H | 3.04134922   | 8.24438522  | 1.68320621  |
| H | 3.99202593   | 5.46713232  | 0.88649654  |
| H | 4.49572243   | 6.90768744  | 0.02121796  |
| H | 3.79600860   | 5.55773030  | -0.87725169 |
| H | -1.11827706  | 2.37519029  | -3.14411693 |
| H | 0.24107595   | 1.79620336  | -2.16167669 |
| H | 0.35391252   | 1.81935523  | -3.92610562 |
| H | -1.01269446  | 4.70560949  | -4.22493789 |
| H | 0.52657623   | 5.58897032  | -4.27827561 |
| H | 0.34711201   | 4.07935236  | -5.18664194 |
| H | 2.32730167   | 3.09186161  | -4.11511448 |
| H | 2.55783372   | 3.05317842  | -2.36326605 |
| H | 2.62471742   | 4.59154779  | -3.22315844 |
| H | -2.10829724  | 2.95984262  | 0.03597791  |
| H | 2.10829757   | 2.95984237  | -0.03597787 |
| H | -3.13977390  | 1.13625970  | 0.85668743  |
| H | -4.59285563  | 2.97979214  | -2.73744285 |
| H | -6.50700086  | 1.37288449  | -2.74142169 |
| H | -4.09710731  | 0.13612882  | 2.60245374  |
| H | -3.19675015  | -1.07309395 | 1.64689544  |
| H | -8.29270531  | 0.33530486  | 0.24347724  |
| H | -7.38644954  | -1.07668794 | 0.85647900  |
| H | -4.01812392  | -1.82762898 | 3.91859303  |
| H | -5.68587555  | -1.69171233 | 3.31490789  |
| H | -9.76249325  | -1.57774259 | 0.33704976  |
| H | -9.48419594  | -1.16419589 | -1.37365942 |
| H | -5.92111544  | -4.07476843 | 3.64293261  |
| H | -4.21819416  | -4.26686566 | 4.13042759  |
| H | -10.19148784 | -3.63797533 | -1.59046273 |
| H | -10.02285647 | -3.95331148 | 0.15409269  |
| H | -3.88261589  | -5.56270000 | 1.93606404  |
| H | -4.83226122  | -6.36198447 | 3.21633519  |
| H | -9.55092644  | -5.94487348 | -1.26864887 |
| H | -8.20221134  | -5.07169452 | -2.04531846 |
| H | -4.26978046  | -7.73470802 | 1.36647171  |
| H | -7.99761363  | -7.49458991 | -1.89159887 |
| H | -4.50654550  | -9.47605196 | -0.36456846 |

|   |             |             |             |
|---|-------------|-------------|-------------|
| H | -6.37273190 | -9.35068590 | -2.01038587 |
| H | 3.13977401  | 1.13625933  | -0.85668739 |
| H | 4.59285596  | 2.97979160  | 2.73744289  |
| H | 6.50700100  | 1.37288373  | 2.74142173  |
| H | 4.09710730  | 0.13612833  | -2.60245370 |
| H | 3.19675000  | -1.07309433 | -1.64689540 |
| H | 8.29270532  | 0.33530388  | -0.24347719 |
| H | 7.38644939  | -1.07668881 | -0.85647896 |
| H | 4.01812369  | -1.82762945 | -3.91859299 |
| H | 5.68587533  | -1.69171300 | -3.31490785 |
| H | 9.76249304  | -1.57774374 | -0.33704972 |
| H | 9.48419578  | -1.16419701 | 1.37365946  |
| H | 5.92111493  | -4.07476913 | -3.64293256 |
| H | 4.21819364  | -4.26686616 | -4.13042755 |
| H | 10.19148739 | -3.63797653 | 1.59046278  |
| H | 10.02285598 | -3.95331266 | -0.15409265 |
| H | 3.88261521  | -5.56270046 | -1.93606400 |
| H | 4.83226045  | -6.36198504 | -3.21633515 |
| H | 9.55092571  | -5.94487461 | 1.26864891  |
| H | 8.20221072  | -5.07169549 | 2.04531850  |
| H | 4.26977953  | -7.73470852 | -1.36647167 |
| H | 7.99761272  | -7.49459085 | 1.89159892  |
| H | 4.50654436  | -9.47605249 | 0.36456850  |
| H | 6.37273077  | -9.35068665 | 2.01038591  |

Point Group= C2. State= 1-A.

HF= -3877.6842961. RMSD=1.793e-09. RMSF=2.259e-06.

Zero-point correction= 1.4121496 (Hartree/Particle)

Sum of electronic and zero-point Energies= -3876.272146

Calculated IR spectrum (unscaled Harmonic frequencies (cm<sup>-1</sup>)):

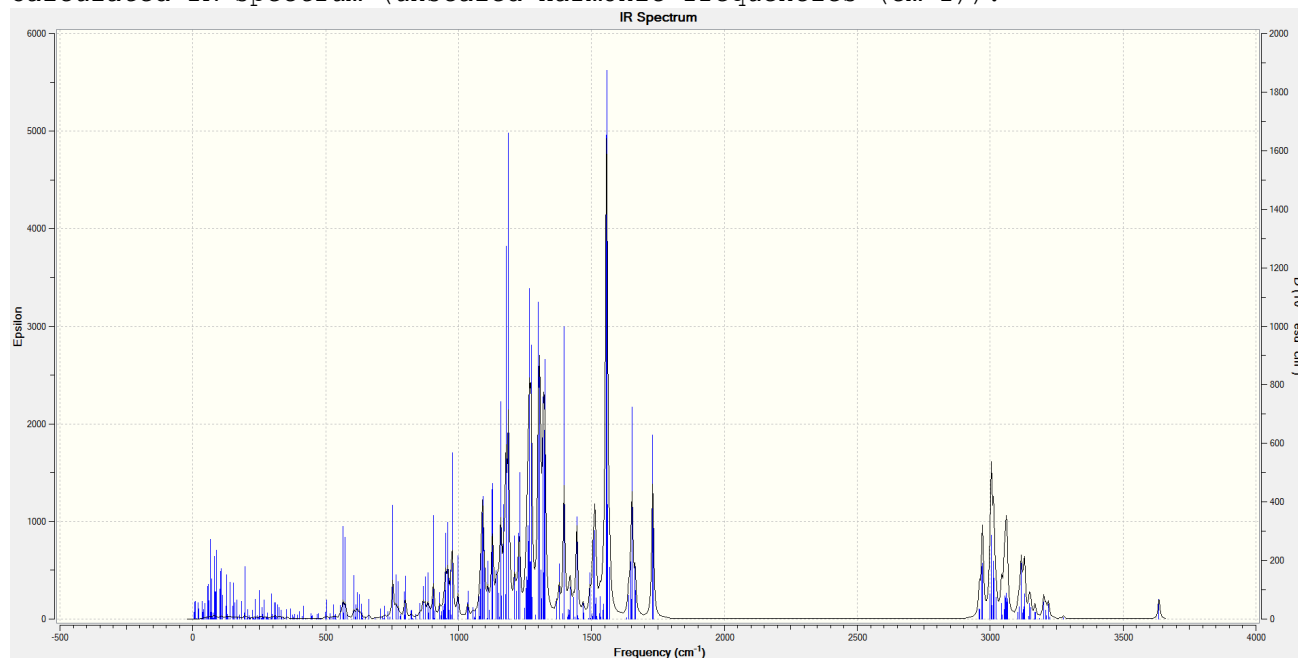

**(1,3,5,7-Tetra-tert-butyl-2,6,9-trioxabicyclo[3.3.1]nona-3,7-diene)-4,8-dicarboxylic acid-(dibenzo-18-crown-6)-4'-yl-amide, Compound 7b-b.**

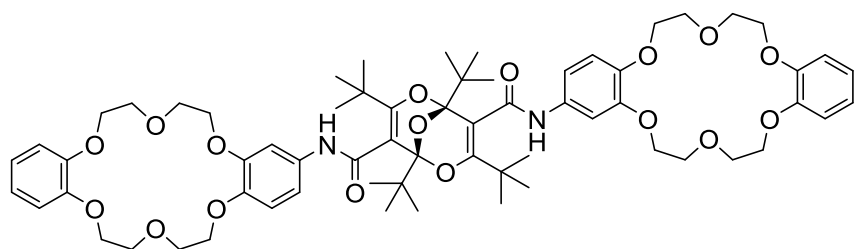

| Atom<br>Type | Coordinates (Angstroms) |             |             |
|--------------|-------------------------|-------------|-------------|
|              | X                       | Y           | Z           |
| O            | -0.68278619             | -4.25562290 | 1.06600548  |
| C            | 0.55280651              | -3.58761327 | 1.16018471  |
| C            | -1.26868594             | -4.18406922 | -0.20812496 |
| C            | 1.00824428              | -3.80253525 | 2.64903042  |
| C            | -2.53827419             | -5.11181925 | -0.13601451 |
| C            | -1.38596147             | -2.68636213 | -0.59895601 |
| C            | 1.47694851              | -4.06868608 | 0.03890273  |
| C            | 0.93715767              | -4.67392021 | -1.04923811 |
| C            | 1.65233849              | -5.31228330 | -2.25834632 |
| O            | -0.40910665             | -4.82901631 | -1.16920862 |
| C            | -0.53794967             | -1.79234184 | -0.02646468 |
| O            | 0.31572023              | -2.15982044 | 0.98417799  |
| C            | -0.24675215             | -0.32473346 | -0.43224017 |
| C            | -1.46945057             | 0.48754856  | -0.90582618 |
| C            | 0.36794930              | 0.44937005  | 0.75757851  |
| C            | 0.76697769              | -0.36903834 | -1.60602453 |
| C            | -0.15179398             | -3.37894235 | 3.57995926  |
| C            | 1.32071662              | -5.29764779 | 2.86511366  |
| C            | 2.24344514              | -2.96449833 | 3.04286632  |
| C            | -2.06601657             | -6.53733109 | 0.24149807  |
| C            | -3.50973577             | -4.62779955 | 0.95369752  |
| C            | -3.26708519             | -5.20588254 | -1.49206014 |
| C            | 2.81431874              | -4.43479335 | -2.77701533 |
| C            | 2.18965268              | -6.69998088 | -1.83083871 |
| C            | 0.65624711              | -5.49274562 | -3.42736532 |
| C            | -2.11920215             | -2.36025564 | -1.87277618 |
| C            | 2.96483264              | -3.88987862 | 0.19003321  |
| O            | -1.58510721             | -2.56690924 | -2.96215596 |
| O            | 3.74158235              | -4.83039819 | 0.36020498  |
| N            | 3.37261497              | -2.58179289 | 0.12942426  |
| N            | -3.41131046             | -1.86757654 | -1.88039677 |
| C            | -4.36337845             | -1.43277808 | -0.92673913 |
| C            | -5.65289462             | -1.16372928 | -1.43208665 |
| C            | -4.11851628             | -1.23366944 | 0.42934283  |
| C            | -6.67173452             | -0.70295365 | -0.60566177 |
| C            | -5.14905337             | -0.78244572 | 1.26721131  |
| C            | -6.42041882             | -0.50854304 | 0.77737006  |
| O            | -7.93565686             | -0.41973847 | -1.01606858 |
| O            | -7.47680656             | -0.06435673 | 1.51295959  |
| C            | -8.25426894             | -0.55810560 | -2.39405984 |
| C            | -7.27628123             | 0.17356510  | 2.89861946  |
| C            | -9.68439824             | -0.10138563 | -2.59658913 |
| C            | -8.56155844             | 0.73176619  | 3.47400086  |
| O            | -9.73560857             | 1.30539653  | -2.49756510 |
| O            | -8.71679659             | 2.06665060  | 3.04195314  |
| C            | -11.04645314            | 1.82330542  | -2.59939732 |
| C            | -9.93068732             | 2.65201191  | 3.46513909  |
| C            | -11.00494461            | 3.32457978  | -2.40130325 |
| C            | -10.03808128            | 4.04686583  | 2.88423378  |
| O            | -10.77537721            | 3.58545317  | -1.02566378 |

|   |              |             |             |
|---|--------------|-------------|-------------|
| O | -10.31725756 | 3.93041881  | 1.49790300  |
| C | -10.65821540 | 4.88374229  | -0.62497994 |
| C | -10.40692643 | 5.07268506  | 0.75873583  |
| C | -10.77199844 | 5.99400184  | -1.45891992 |
| C | -10.27779566 | 6.36562004  | 1.26157960  |
| C | -10.63869925 | 7.28995984  | -0.94075840 |
| C | -10.39292751 | 7.47461497  | 0.41155557  |
| C | 4.66473486   | -2.04052365 | 0.32483491  |
| C | 4.76183294   | -0.63362339 | 0.35154171  |
| C | 5.81388218   | -2.81269998 | 0.48116286  |
| C | 5.98924206   | -0.00733818 | 0.53050577  |
| C | 7.05243322   | -2.17611995 | 0.64463069  |
| C | 7.16597869   | -0.79052107 | 0.65453920  |
| O | 6.17613006   | 1.33821531  | 0.61056194  |
| O | 8.32613324   | -0.08447664 | 0.76982595  |
| C | 5.04703279   | 2.19344893  | 0.54638238  |
| C | 9.53801037   | -0.79846127 | 0.94581405  |
| C | 5.48964131   | 3.58990610  | 0.93269982  |
| C | 10.68778668  | 0.18361366  | 0.83765618  |
| O | 6.36318473   | 4.10153694  | -0.05006866 |
| O | 10.62118249  | 1.10344040  | 1.90822966  |
| C | 6.87572386   | 5.37687389  | 0.27826388  |
| C | 11.77628775  | 1.89353371  | 2.09527881  |
| C | 7.99884737   | 5.72600730  | -0.67614892 |
| C | 12.23520506  | 2.70993361  | 0.89198573  |
| O | 9.14598748   | 4.97626641  | -0.30306897 |
| O | 11.18739115  | 3.57486167  | 0.48740847  |
| C | 10.28137549  | 5.12502075  | -1.04129337 |
| C | 11.39647623  | 4.35937528  | -0.61176514 |
| C | 10.40995439  | 5.95760119  | -2.15178137 |
| C | 12.59985216  | 4.45222907  | -1.30846815 |
| C | 11.62579714  | 6.04074772  | -2.84408004 |
| C | 12.71516979  | 5.29211131  | -2.42498501 |
| H | -2.26027830  | 0.52104967  | -0.15430888 |
| H | -1.89212215  | 0.11591498  | -1.83822339 |
| H | -1.14481503  | 1.51627997  | -1.09211042 |
| H | -0.32151235  | 0.48903859  | 1.60670162  |
| H | 1.30123778   | 0.00868231  | 1.11093348  |
| H | 0.57196510   | 1.47765158  | 0.44298482  |
| H | 1.02771237   | 0.65185110  | -1.90650554 |
| H | 0.34044198   | -0.88923896 | -2.46683591 |
| H | 1.69559175   | -0.88064530 | -1.33941365 |
| H | -1.04926676  | -3.97556754 | 3.41096190  |
| H | -0.40659616  | -2.32483176 | 3.43885395  |
| H | 0.15747041   | -3.51672150 | 4.62088699  |
| H | 0.44794631   | -5.92061916 | 2.65430278  |
| H | 2.14714937   | -5.63187876 | 2.23304982  |
| H | 1.60604027   | -5.45931480 | 3.91005332  |
| H | 3.16917939   | -3.32937409 | 2.59825398  |
| H | 2.36652711   | -3.02777313 | 4.12889212  |
| H | 2.11936049   | -1.90900068 | 2.78776509  |
| H | -1.51591437  | -6.54543721 | 1.18414742  |
| H | -1.42900592  | -6.96833863 | -0.53330313 |
| H | -2.94474025  | -7.18018009 | 0.35588279  |
| H | -3.02507480  | -4.59476368 | 1.93264709  |
| H | -3.91902831  | -3.64082966 | 0.73843949  |
| H | -4.35170691  | -5.32513575 | 1.01890578  |
| H | -3.82795878  | -4.30093282 | -1.72803643 |
| H | -3.98737706  | -6.02928745 | -1.44684405 |
| H | -2.57226893  | -5.40910563 | -2.30975863 |
| H | 3.64522190   | -4.36923253 | -2.07570519 |

|   |              |             |             |
|---|--------------|-------------|-------------|
| H | 2.47053122   | -3.42414648 | -3.01814543 |
| H | 3.20547769   | -4.88019762 | -3.69768350 |
| H | 2.92373380   | -6.60426305 | -1.02891369 |
| H | 1.37317420   | -7.34165274 | -1.48259852 |
| H | 2.66045111   | -7.19299537 | -2.68888631 |
| H | 1.20045590   | -5.87978998 | -4.29483021 |
| H | 0.18163194   | -4.54712585 | -3.70159120 |
| H | -0.13431700  | -6.20470448 | -3.18120753 |
| H | 2.62337774   | -1.90883387 | 0.05593532  |
| H | -3.71780045  | -1.77932510 | -2.84264437 |
| H | -5.84639478  | -1.32305801 | -2.48677851 |
| H | -3.14412424  | -1.43347624 | 0.84977951  |
| H | -4.93119988  | -0.64257273 | 2.31890447  |
| H | -8.15588932  | -1.60826719 | -2.70627702 |
| H | -7.58445502  | 0.05572285  | -3.01093693 |
| H | -6.46289070  | 0.89458212  | 3.05635561  |
| H | -7.01804210  | -0.76278612 | 3.41532506  |
| H | -10.02529220 | -0.43932036 | -3.59120577 |
| H | -10.32937445 | -0.57700119 | -1.84141554 |
| H | -9.40838096  | 0.10796752  | 3.14789511  |
| H | -8.50866388  | 0.67831284  | 4.57581346  |
| H | -11.70868231 | 1.37385484  | -1.84332366 |
| H | -11.47522457 | 1.60898547  | -3.59414673 |
| H | -9.96838983  | 2.72306393  | 4.56651622  |
| H | -10.79435868 | 2.05294281  | 3.13707601  |
| H | -10.20462955 | 3.75303452  | -3.01973087 |
| H | -11.96293929 | 3.76047250  | -2.72191904 |
| H | -10.84455318 | 4.59329504  | 3.39574008  |
| H | -9.09510024  | 4.58548317  | 3.04902134  |
| H | -10.96343546 | 5.86085795  | -2.51690549 |
| H | -10.08592701 | 6.52128771  | 2.31643418  |
| H | -10.72944498 | 8.14216359  | -1.60700494 |
| H | -10.28795717 | 8.47393440  | 0.82235380  |
| H | 3.86347326   | -0.03888127 | 0.22977998  |
| H | 5.74356590   | -3.88980369 | 0.47519366  |
| H | 7.93499714   | -2.79300895 | 0.76496047  |
| H | 4.26980400   | 1.86725994  | 1.25290414  |
| H | 4.61916433   | 2.19368258  | -0.46600367 |
| H | 9.66051718   | -1.56166557 | 0.16314561  |
| H | 9.55107931   | -1.29840649 | 1.92451403  |
| H | 4.59093809   | 4.22435030  | 1.03472101  |
| H | 5.98684493   | 3.55082474  | 1.91430481  |
| H | 11.63094828  | -0.39048868 | 0.86363174  |
| H | 10.62517060  | 0.69763220  | -0.13166120 |
| H | 7.26356991   | 5.39419160  | 1.30824150  |
| H | 6.08759776   | 6.14646095  | 0.20167937  |
| H | 12.63477883  | 1.26849666  | 2.40253222  |
| H | 11.53567654  | 2.56955912  | 2.92061012  |
| H | 7.69373287   | 5.48979566  | -1.70444626 |
| H | 8.20929635   | 6.80395904  | -0.61409321 |
| H | 13.12685876  | 3.28209704  | 1.19201062  |
| H | 12.53046857  | 2.05683140  | 0.05880972  |
| H | 9.56465114   | 6.54470456  | -2.48969544 |
| H | 13.45874370  | 3.87509582  | -0.98786108 |
| H | 11.70369587  | 6.69383254  | -3.70770924 |
| H | 13.66159215  | 5.34932973  | -2.95354231 |

Point Group= C1. State= 1-A.

HF= -3877.6652277. RMSD=1.379e-09. RMSF=1.042e-06

Zero-point correction= 1.412655 (Hartree/Particle)

Sum of electronic and zero-point Energies= -3876.252573

Calculated IR spectrum (unscaled Harmonic frequencies (cm-1)):

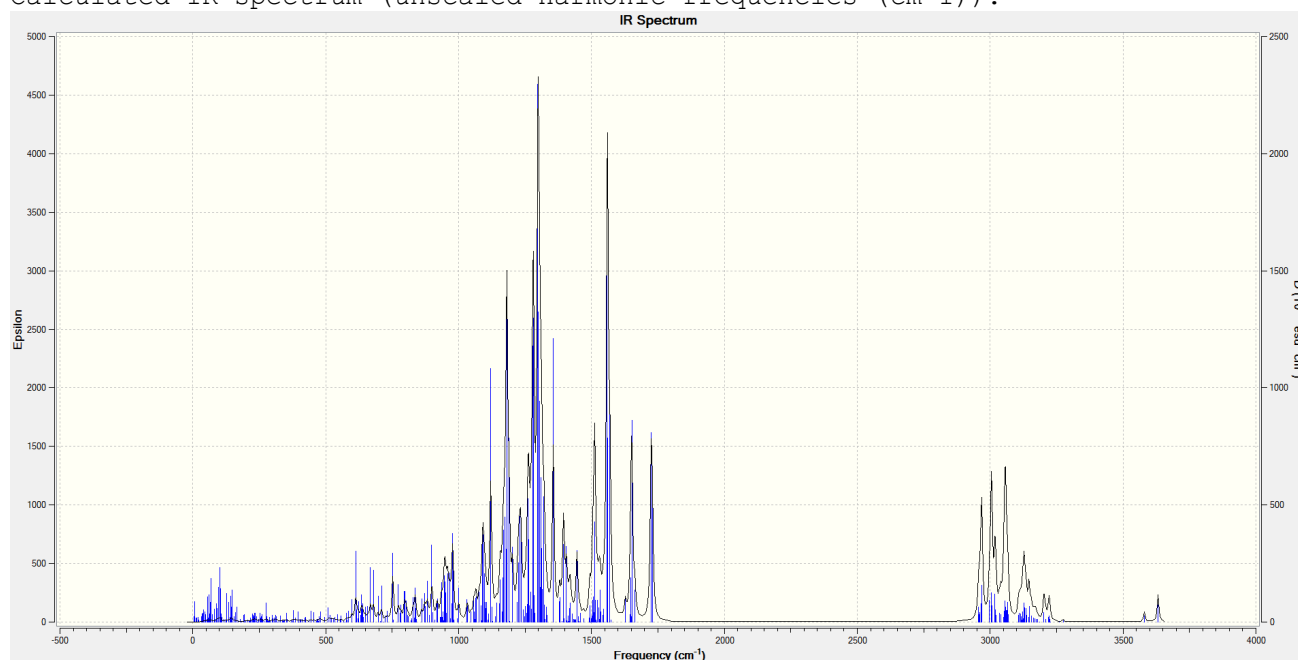

**(1,3,5,7-Tetra-tert-butyl-2,6,9-trioxabicyclo[3.3.1]nona-3,7-diene)-4,8-dicarboxylic acid-(dibenzo-18-crown-6)-4'-yl-amide, Compound 7b-c.**

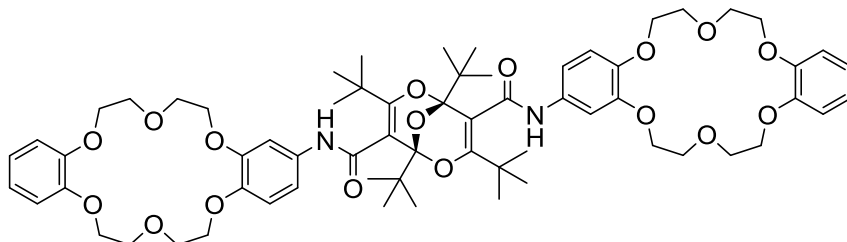

| Atom Type | Coordinates (Angstroms) |             |             |
|-----------|-------------------------|-------------|-------------|
|           | X                       | Y           | Z           |
| O         | -0.00006600             | -0.00024200 | -0.62989200 |
| C         | -0.49871600             | 1.07014500  | 0.13923900  |
| C         | 0.49869800              | -1.07082200 | 0.13889700  |
| C         | -0.84871900             | 2.19621200  | -0.90197400 |
| C         | 0.84853000              | -2.19663400 | -0.90264700 |
| C         | 1.58506800              | -0.52144800 | 1.09570400  |
| C         | -1.58494300             | 0.52053100  | 1.09606700  |
| C         | -1.48767400             | -0.77255700 | 1.49590700  |
| C         | -2.23321900             | -1.55430200 | 2.59620500  |
| O         | -0.56788200             | -1.61912100 | 0.93886000  |
| C         | 1.48786600              | 0.77154500  | 1.49586800  |
| O         | 0.56798900              | 1.61824600  | 0.93916800  |
| C         | 2.23359400              | 1.55303300  | 2.59622400  |
| C         | 3.44523900              | 0.84172800  | 3.22367500  |
| C         | 2.71903700              | 2.90546000  | 2.01935900  |
| C         | 1.20359800              | 1.81684100  | 3.72563000  |
| C         | 0.43756000              | 2.53394400  | -1.69449000 |
| C         | -1.91021500             | 1.69675000  | -1.89846100 |
| C         | -1.33357900             | 3.49681600  | -0.22723400 |



|   |              |             |             |
|---|--------------|-------------|-------------|
| C | -0.43787000  | -2.53412700 | -1.69506900 |
| C | 1.90991400   | -1.69696100 | -1.89914700 |
| C | 1.33342800   | -3.49742400 | -0.22829500 |
| C | -3.44481400  | -0.84318200 | 3.22396000  |
| C | -2.71867400  | -2.90664200 | 2.01914700  |
| C | -1.20305100  | -1.81827500 | 3.72541900  |
| C | 2.45976100   | -1.52565800 | 1.79083900  |
| C | -2.45955900  | 1.52455800  | 1.79155400  |
| O | 2.00824100   | -2.25289100 | 2.67470600  |
| O | -2.00793700  | 2.25160000  | 2.67552200  |
| N | -3.77767900  | 1.72270200  | 1.42232800  |
| N | 3.77781300   | -1.72377200 | 1.42136600  |
| C | -4.70460100  | 1.13940400  | 0.52609400  |
| C | -5.91339700  | 1.84774000  | 0.35503700  |
| C | -4.52406200  | -0.05745200 | -0.16281100 |
| C | -6.91760000  | 1.37305600  | -0.48051300 |
| C | -5.53351300  | -0.53278000 | -1.01316500 |
| C | -6.72922100  | 0.15443600  | -1.18269400 |
| O | -8.10366500  | 1.99950800  | -0.70173100 |
| O | -7.76215600  | -0.23200600 | -1.98293000 |
| C | -8.36484200  | 3.22158500  | -0.02633800 |
| C | -7.65341200  | -1.47282000 | -2.66419000 |
| C | -9.75470200  | 3.68671800  | -0.40907400 |
| C | -8.94368500  | -1.71323200 | -3.42039800 |
| O | -10.70822200 | 2.86890600  | 0.23390900  |
| O | -9.96364000  | -2.04814400 | -2.50359800 |
| C | -12.03910800 | 3.18248800  | -0.12134500 |
| C | -11.22522000 | -2.21814500 | -3.11527700 |
| C | -12.97778700 | 2.20365500  | 0.55333300  |
| C | -12.26320400 | -2.50006600 | -2.04861100 |
| O | -12.86395800 | 0.95220100  | -0.10539800 |
| O | -12.52008700 | -1.29433100 | -1.34597700 |
| C | -13.58931900 | -0.09810400 | 0.37444800  |
| C | -13.40074100 | -1.32924500 | -0.30544900 |
| C | -14.47576900 | -0.03634000 | 1.44757800  |
| C | -14.10501800 | -2.45695700 | 0.11136800  |
| C | -15.17741300 | -1.17865400 | 1.85792100  |
| C | -14.99309000 | -2.38195900 | 1.19364800  |
| C | 4.70469600   | -1.14016700 | 0.52529000  |
| C | 5.91361500   | -1.84828100 | 0.35419500  |
| C | 4.52400300   | 0.05676400  | -0.16344100 |
| C | 6.91779900   | -1.37329900 | -0.48120900 |
| C | 5.53343600   | 0.53239500  | -1.01364700 |
| C | 6.72927000   | -0.15459500 | -1.18320600 |
| O | 8.10398400   | -1.99952300 | -0.70243800 |
| O | 7.76220100   | 0.23215800  | -1.98329600 |
| C | 8.36535800   | -3.22159700 | -0.02711600 |
| C | 7.65326700   | 1.47304300  | -2.66439900 |
| C | 9.75538900   | -3.68635700 | -0.40968200 |
| C | 8.94354600   | 1.71380000  | -3.42048800 |
| O | 10.70860700  | -2.86839400 | 0.23355700  |
| O | 9.96336400   | 2.04881000  | -2.50357200 |
| C | 12.03962800  | -3.18157600 | -0.12154800 |
| C | 11.22496500  | 2.21911500  | -3.11512500 |
| C | 12.97794300  | -2.20257700 | 0.55339300  |
| C | 12.26279100  | 2.50116900  | -2.04834100 |
| O | 12.86387200  | -0.95107100 | -0.10519700 |
| O | 12.51984500  | 1.29543600  | -1.34576800 |
| C | 13.58898500  | 0.09933600  | 0.37480200  |
| C | 13.40031300  | 1.33046900  | -0.30508500 |
| C | 14.47526000  | 0.03768800  | 1.44808300  |

|   |              |             |             |
|---|--------------|-------------|-------------|
| C | 14.10432500  | 2.45828700  | 0.11188800  |
| C | 15.17663800  | 1.18010900  | 1.85858400  |
| C | 14.99222400  | 2.38340400  | 1.19431900  |
| H | 4.24507200   | 0.65876800  | 2.50369900  |
| H | 3.16980500   | -0.09824600 | 3.70570000  |
| H | 3.85113500   | 1.49650100  | 4.00165100  |
| H | 3.45008200   | 2.75764900  | 1.21723700  |
| H | 1.89145100   | 3.49904800  | 1.62912600  |
| H | 3.20803700   | 3.48000500  | 2.81260700  |
| H | 1.65766900   | 2.46475100  | 4.48372300  |
| H | 0.92338500   | 0.87651500  | 4.21142400  |
| H | 0.29330700   | 2.28755300  | 3.35261100  |
| H | 0.85546900   | 1.65139700  | -2.18213700 |
| H | 1.20330200   | 2.96800400  | -1.04779300 |
| H | 0.19281300   | 3.26732600  | -2.46977400 |
| H | -1.55660200  | 0.82258200  | -2.45076500 |
| H | -2.85126400  | 1.43554500  | -1.41247500 |
| H | -2.12266900  | 2.48944700  | -2.62381600 |
| H | -2.35554700  | 3.41901600  | 0.14478200  |
| H | -1.32106000  | 4.29994500  | -0.97149200 |
| H | -0.68696900  | 3.78984100  | 0.60200100  |
| H | -0.85581200  | -1.65145100 | -2.18245300 |
| H | -1.20354000  | -2.96830200 | -1.04836400 |
| H | -0.19326100  | -3.26734100 | -2.47055600 |
| H | 1.55628800   | -0.82260000 | -2.45113700 |
| H | 2.85106000   | -1.43597900 | -1.41322800 |
| H | 2.12219300   | -2.48945800 | -2.62477100 |
| H | 2.35544300   | -3.41975100 | 0.14362000  |
| H | 1.32079500   | -4.30036500 | -0.97275400 |
| H | 0.68690400   | -3.79063700 | 0.60094100  |
| H | -4.24476900  | -0.66015200 | 2.50413800  |
| H | -3.16937100  | 0.09673100  | 3.70609900  |
| H | -3.85054700  | -1.49811200 | 4.00189000  |
| H | -3.44983000  | -2.75871500 | 1.21714800  |
| H | -1.89111300  | -3.50012100 | 1.62869600  |
| H | -3.20754600  | -3.48135600 | 2.81235200  |
| H | -1.65698500  | -2.46635400 | 4.48345200  |
| H | -0.92282400  | -0.87802700 | 4.21135300  |
| H | -0.29278800  | -2.28887300 | 3.35218600  |
| H | -4.16104300  | 2.47417300  | 1.98414700  |
| H | 4.16124000   | -2.47535500 | 1.98299200  |
| H | -6.05170200  | 2.78203100  | 0.88709700  |
| H | -3.60649300  | -0.61757300 | -0.06534000 |
| H | -5.36392200  | -1.46413500 | -1.53941800 |
| H | -7.62966600  | 3.98574000  | -0.31907900 |
| H | -8.31214900  | 3.08367100  | 1.06196500  |
| H | -7.48521700  | -2.29321800 | -1.95344200 |
| H | -6.81365600  | -1.44992600 | -3.37489100 |
| H | -9.87033200  | 4.74158800  | -0.10298300 |
| H | -9.86541800  | 3.64075300  | -1.50371300 |
| H | -9.20514100  | -0.80836400 | -3.99105000 |
| H | -8.78156800  | -2.53178100 | -4.14400200 |
| H | -12.17999500 | 3.13027000  | -1.21211600 |
| H | -12.30029400 | 4.20501500  | 0.20387400  |
| H | -11.20645400 | -3.06629100 | -3.82239700 |
| H | -11.51629100 | -1.31776800 | -3.67854300 |
| H | -12.71028100 | 2.11224300  | 1.61471800  |
| H | -14.00833700 | 2.58330000  | 0.48601800  |
| H | -13.18257400 | -2.87131600 | -2.52568000 |
| H | -11.88773300 | -3.27620100 | -1.36802600 |
| H | -14.62683300 | 0.89853100  | 1.97393000  |

|   |              |             |             |
|---|--------------|-------------|-------------|
| H | -13.96765300 | -3.40223900 | -0.39974500 |
| H | -15.86221300 | -1.11047500 | 2.69744800  |
| H | -15.53102800 | -3.27224000 | 1.50418400  |
| H | 6.05203700   | -2.78263400 | 0.88611500  |
| H | 3.60633800   | 0.61672500  | -0.06594000 |
| H | 5.36372900   | 1.46381200  | -1.53975200 |
| H | 7.63040900   | -3.98590400 | -0.32003400 |
| H | 8.31247000   | -3.08379400 | 1.06119200  |
| H | 7.48487800   | 2.29331500  | -1.95355100 |
| H | 6.81355800   | 1.45008600  | -3.37515300 |
| H | 9.87121900   | -4.74123700 | -0.10369900 |
| H | 9.86627400   | -3.64023400 | -1.50429800 |
| H | 9.20522400   | 0.80905100  | -3.99122600 |
| H | 8.78131900   | 2.53240200  | -4.14400800 |
| H | 12.18065600  | -3.12917500 | -1.21229100 |
| H | 12.30104100  | -4.20407500 | 0.20357500  |
| H | 11.20608900  | 3.06731100  | -3.82218200 |
| H | 11.51627100  | 1.31884000  | -3.67843100 |
| H | 12.71025000  | -2.11137400 | 1.61474900  |
| H | 14.00860800  | -2.58193000 | 0.48618800  |
| H | 13.18213200  | 2.87263700  | -2.52529600 |
| H | 11.88710100  | 3.27718100  | -1.36773600 |
| H | 14.62638600  | -0.89717200 | 1.97443800  |
| H | 13.96689200  | 3.40356000  | -0.39922100 |
| H | 15.86130300  | 1.11202000  | 2.69822800  |
| H | 15.52995800  | 3.27376700  | 1.50497600  |

Point Group= C1. State= 1-A.

HF= -3877.6577297. RMSD=3.538e-09. RMSF=9.346e-07

Zero-point correction= 1.412393 (Hartree/Particle)

Sum of electronic and zero-point Energies= -3876.245337

Calculated IR spectrum (unscaled Harmonic frequencies (cm-1)):

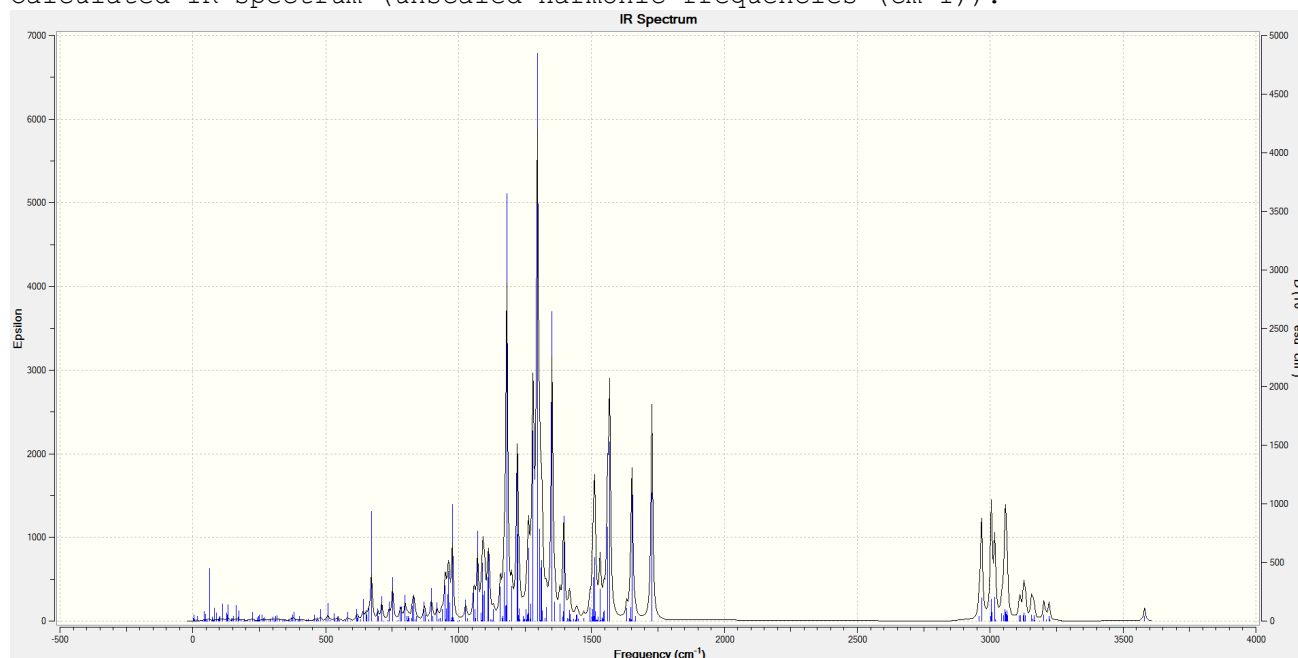

## References

1. Kremsner, J.; Wallfisch, B. C.; Belaj, F.; Uray, G.; Kappe, C. O.; Wentrup, C.; Kollenz, G. *Eur. J. Org. Chem.* **2008**, 3382–3388.
2. Smounig, R.; Leber, S.; Kvaskoff, D.; Kollenz, G.; Wentrup, C. *RSC Adv.* **2012**, 2, 7743–7746.
3. Smounig, R.; Kappe, C. O.; Wentrup, C.; Kollenz, G. *Monatsh. Chem.* **2003**, 134, 509–518.
4. Smounig, R. Ph.D. Thesis, Karl Franzens Universität Graz, Austria; 1998.
5. Heilmayer, W.; Smounig, R.; Gruber, K.; Fabian, W. M. F.; Reidlinger, C.; Kappe, C. O.; Wentrup, C.; Kollenz, G. *Tetrahedron* **2004**, 60, 2857–2867.
6. *Gaussian 09*, Revision A.02; Gaussian, Inc.: Pittsburgh, 2009.
7. Wong, M. W. *Chem. Phys. Lett.* **1996**, 256, 391.
